# Supplementary material
Source: publisher site journal article supplement (https://vcs.pensoft.net/article/86102/download/suppl/31/)
Supplement: Supplementary file 1

## Sheet: biomes16_climate2
num	domain	ecozone	biome	subbiome	name	location	country	lat	lon	alt	BIO1	BIO2	BIO3	BIO5	BIO6	BIO7	BIO8	BIO9	BIO10	BIO11	BIO12	BIO15	BIO16	BIO17	BIO18	BIO19	nfd	CI	Pp	Tp	Io	dws	dws_log	BIO15_log	BIO17_log	BIO16_log	BIO18_log	BIO19_log	Pp_log	Io_log	thermotype	ombrotype
1	A	AA	1	1a	Tundra Eurasia	Troms og Finnmark county	Norway	71.0246	25.6555	260	13	31	164	116	-75	192	34	18	95	-55	675	22	223	117	153	190	199	568	324	375	8.64	1.61053	0.416728	1.34242	2.07188	2.3483	2.18752	2.28103	2.51055	0.936514	crioro	humid
2	A	AA	1	1a	Tundra Eurasia	Murmansk Oblast	Russia	68.4997	36.906	215	-2	43	174	135	-115	249	98	-73	98	-93	493	31	189	78	189	85	219	754	309	365	8.46575	1.92857	0.466656	1.49136	1.89763	2.27646	2.27875	1.9345	2.48996	0.927666	crioro	humid
3	A	AA	1	1a	Tundra Eurasia	Nenets Autonomous Okrug	Russia	68.654	62.4227	122	-64	62	154	155	-247	402	97	-127	97	-214	432	31	163	65	163	85	256	1481	200	307	6.51466	1.68041	0.428202	1.49136	1.81954	2.21219	2.21484	1.9345	2.30103	0.813892	crioro	humid
4	A	AA	1	1a	Tundra Eurasia	Yamalo-Nenets Autonomous Okrug	Russia	69.8635	77.0373	63	-94	63	139	155	-297	451	101	-229	101	-262	315	41	133	47	133	49	265	1834	160	293	5.46075	1.31683	0.364894	1.61278	1.68124	2.12385	2.1271	1.69897	2.20412	0.737252	crioro	subhumid
5	A	AA	1	1a	Tundra Eurasia	Krasnoyarsk Krai	Russia	73.6318	92.1267	62	-124	54	119	125	-328	452	80	-105	80	-296	284	26	105	45	105	66	277	2151	121	202	5.9901	1.3125	0.364082	1.41497	1.66276	2.02119	2.02531	1.82607	2.08279	0.777434	crioro	subhumid
6	A	AA	1	1a	Tundra Eurasia	Sakha Republic	Russia	71.6381	116.014	111	-131	58	110	154	-373	527	98	-340	102	-340	217	50	99	27	94	27	266	2296	120	285	4.21053	0.921569	0.283656	1.69897	1.44716	1.99564	1.97772	1.44716	2.07918	0.624336	crioro	subhumid
7	A	AA	1	1a	Tundra Eurasia	Sakha Republic	Russia	70.968	142.746	12	-131	60	116	147	-367	514	89	-202	95	-339	188	61	102	18	94	25	265	2283	109	269	4.05204	0.989474	0.298738	1.78533	1.27875	2.0086	1.97772	1.41497	2.03743	0.607674	crioro	subhumid
8	A	AA	1	1a	Tundra Eurasia	Chukotka Autonomous Okrug	Russia	68.8752	174.827	480	-125	61	130	130	-341	471	73	-208	83	-310	276	69	162	27	145	38	278	2161	139	216	6.43519	1.74699	0.438857	1.83885	1.44716	2.20952	2.16435	1.59106	2.14301	0.808561	crioro	humid
9	A	AA	1	1a	Tundra Eurasia	Chukotka Autonomous Okrug	Russia	68.2467	179.149	698	-122	57	134	114	-314	428	58	-263	66	-286	318	60	178	37	147	51	291	2092	149	168	8.86905	2.22727	0.508836	1.77815	1.57978	2.25042	2.17026	1.716	2.17319	0.947877	crioro	humid
10	A	AA	1	1a	Tundra NA	Alaska	USA	69.5912	-154.777	120	-105	66	138	162	-319	481	95	-70	107	-284	168	78	112	14	80	20	266	1991	107	297	3.60269	0.747664	0.242458	1.89209	1.17609	2.04922	1.90849	1.32222	2.02938	0.556627	crioro	subhumid
11	A	AA	1	1a	Tundra NA	Northwest Territories	Canada	68.3025	-122.513	480	-115	70	143	156	-337	493	90	-302	97	-302	225	67	136	25	98	25	273	2098	136	274	4.9635	1.01031	0.303263	1.82607	1.41497	2.13354	1.99564	1.41497	2.13354	0.695788	crioro	subhumid
12	A	AA	1	1a	Tundra NA	Northwest Territories	Canada	70.5813	-110.617	221	-142	63	125	137	-364	501	75	-331	78	-331	123	94	87	6	70	6	288	2369	70	200	3.5	0.897436	0.278167	1.97313	0.845098	1.93952	1.85126	0.845098	1.8451	0.544068	crioro	dry
13	A	AA	1	1a	Tundra NA	Nunavut, Canada	Canada	65.1227	-102.493	211	-112	70	138	166	-342	507	103	-307	103	-307	201	76	124	12	124	12	274	2060	129	290	4.44828	1.20388	0.343189	1.88081	1.11394	2.09342	2.09691	1.11394	2.11059	0.648192	crioro	subhumid
14	A	AA	1	1a	Tundra NA	Nunavut	Canada	67.6547	-84.4345	400	-147	61	122	120	-376	496	61	-345	61	-345	249	70	144	17	144	17	302	2397	112	141	7.94326	2.36066	0.526424	1.8451	1.25527	2.15836	2.16137	1.25527	2.04922	0.899999	crioro	humid
15	A	AA	1	1a	Tundra NA	Nunavut	Canada	65.7833	-69.0379	278	-97	55	126	133	-301	434	79	-239	79	-272	384	44	169	48	169	49	277	1834	189	216	8.75	2.13924	0.496825	1.64345	1.6902	2.22789	2.23045	1.69897	2.27646	0.942008	crioro	humid
16	A	AA	1	1a	Tundra NA	Quebec	Canada	59.3329	-72.2732	228	-69	68	151	156	-292	448	102	-256	102	-256	397	44	175	55	175	55	256	1552	206	314	6.56051	1.71569	0.43388	1.64345	1.74819	2.24304	2.24551	1.74819	2.31387	0.816938	crioro	humid
17	A	AA	1	1a	Tundra NA	Greenland	Denmark	60.5242	-44.9502	0	-10	42	207	96	-109	205	47	-76	68	-84	910	14	273	181	263	198	226	771	402	259	15.5212	3.86765	0.687319	1.14613	2.26007	2.43616	2.4216	2.29885	2.60423	1.19093	crioro	hyperhumid
18	A	AA	1	1a	Tundra NA	Nunavut	Canada	64.2084	-68.8907	339	-98	61	136	136	-311	446	80	-241	80	-278	429	41	189	63	189	64	280	1839	214	217	9.86175	2.3625	0.526662	1.61278	1.80618	2.27646	2.27875	1.81291	2.33041	0.993954	crioro	humid
19	A	AA	1	1a	Tundra NA	Krasnoyarsk Krai	Russia	71.1221	83.3735	29	-102	60	131	150	-307	458	51	-93	101	-272	352	26	121	51	119	88	265	1933	144	286	5.03497	1.17822	0.338101	1.41497	1.716	2.08279	2.07918	1.94939	2.15836	0.701996	crioro	subhumid
20	A	AA	1	1a	Tundra AT	Elephant Island	Antarctica	-61.138	-55.1894	423	-25	23	225	17	-86	103	4	-62	10	-62	671	18	220	128	210	128	304	895	212	22	96.3636	21	1.34242	1.25527	2.11059	2.34242	2.32428	2.11059	2.32634	1.98391	crioro	hyperhumid
21	A	AA	1	1a	Tundra AT	Livingston	Antarctica	-62.6404	-61.0707	0	-17	21	227	22	-70	93	16	-35	16	-52	806	20	261	144	261	156	274	803	327	45	72.6667	16.3125	1.23836	1.30103	2.16137	2.41664	2.4183	2.1959	2.51455	1.86134	crioro	hyperhumid
22	A	AA	1	1a	Tundra AT	King George Island	Antarctica	-62.1811	-58.9393	4	-21	22	223	20	-79	99	7	-43	14	-56	781	18	254	146	246	169	284	850	302	36	83.8889	17.5714	1.26885	1.25527	2.16732	2.40483	2.3927	2.23045	2.48001	1.9237	crioro	hyperhumid
23	A	AA	1	1b	Alp_tund_Pyrenees	Nouvelle-Aquitaine region	France	42.842	-0.4368	2410	7	88	357	146	-101	247	-47	87	87	-61	1806	19	575	321	321	520	258	608	813	337	24.1246	3.68966	0.671141	1.27875	2.50786	2.75967	2.50786	2.71684	2.91009	1.38246	crioro	hyperhumid
24	A	AA	1	1b	Alp_tund_Pyrenees	Aragon	Spain	42.7659	-0.1929	2498	4	89	355	144	-106	250	-50	78	85	-65	1393	21	458	245	245	404	264	637	635	323	19.6594	2.88235	0.589095	1.32222	2.39094	2.66087	2.39094	2.60746	2.80277	1.29357	crioro	hyperhumid
25	A	AA	1	1b	Alp_tund_Pyrenees	Aragon	Spain	42.6787	0.0222	2923	-21	89	356	119	-131	250	-75	60	60	-90	1364	18	418	263	263	362	321	879	395	184	21.4674	4.38333	0.731051	1.25527	2.4216	2.62118	2.4216	2.55991	2.5966	1.33178	crioro	hyperhumid
26	A	AA	1	1b	Alp_tund_Pyrenees	Aragon	Spain	42.6469	0.6545	2818	-13	87	346	127	-125	252	-10	-82	69	-83	1161	16	363	222	287	258	295	800	522	223	23.4081	4.15942	0.712601	1.20412	2.3483	2.55991	2.45939	2.4133	2.71767	1.36937	crioro	hyperhumid
27	A	AA	1	1b	Alp_tund_Pyrenees	Aragon	Spain	42.6954	0.5286	2824	-14	87	348	126	-124	250	-10	-82	68	-84	1266	15	395	260	281	307	297	805	537	218	24.633	4.13235	0.710317	1.17609	2.41664	2.5966	2.45025	2.48855	2.72997	1.39152	crioro	hyperhumid
28	A	AA	1	1b	Alp_tund_Alps	Auvergne-Rhone-Alpes region	France	44.906	6.2286	2796	-17	83	308	128	-140	269	-42	74	74	-99	1279	10	372	278	278	335	283	856	509	244	20.8607	3.75676	0.677311	1	2.4456	2.57054	2.4456	2.52634	2.70672	1.31933	crioro	hyperhumid
29	A	AA	1	1b	Alp_tund_Alps	Auvergne-Rhone-Alpes region	France	45.4388	7.0759	2969	-31	84	306	115	-158	273	26	-112	61	-115	1187	14	366	262	312	277	305	992	405	185	21.8919	5.11475	0.786379	1.14613	2.41996	2.56348	2.49554	2.44404	2.60746	1.34028	crioro	hyperhumid
30	A	AA	1	1b	Alp_tund_Alps	Valais	Switzerland	46.1456	7.9658	2666	-17	80	301	125	-141	266	-2	-100	73	-100	1113	22	366	195	304	195	275	856	521	251	20.757	4.16438	0.713018	1.34242	2.29226	2.56348	2.4843	2.29226	2.71684	1.31716	crioro	hyperhumid
31	A	AA	1	1b	Alp_tund_Alps	Lombardy region	Italy	46.4268	9.4206	2310	1	79	297	142	-124	266	67	-80	92	-84	1382	35	475	158	448	181	243	698	900	356	25.2809	4.86957	0.768606	1.54407	2.2014	2.67669	2.65225	2.26007	2.95424	1.40279	crioro	hyperhumid
32	A	AA	1	1b	Alp_tund_Alps	Lombardy region	Italy	46.4916	11.8224	2177	-12	83	299	129	-147	276	48	-95	79	-101	1114	38	414	140	392	143	263	816	638	286	22.3077	4.96203	0.775394	1.57978	2.14922	2.617	2.59439	2.15836	2.80482	1.34845	crioro	hyperhumid
33	A	AA	1	1b	Alp_tund_Alps	Tyrol	Austria	47.0988	11.752	2229	-1	85	306	141	-135	276	86	-84	90	-89	909	37	352	118	351	135	246	713	597	352	16.9602	3.9	0.690196	1.5682	2.07555	2.54654	2.54654	2.13354	2.77597	1.22943	crioro	hyperhumid
34	A	AA	1	1b	Alp_tund_Carpathians	Presov Region	Slovakia	49.1501	20.1267	1949	-9	74	272	134	-140	274	83	-102	86	-104	1234	32	467	187	420	211	248	806	684	325	21.0462	4.88372	0.769652	1.50515	2.27416	2.66932	2.62428	2.32634	2.83506	1.32317	crioro	hyperhumid
35	A	AA	1	1b	Alp_tund_Carpathians	Presov Region	Slovakia	49.1977	20.1376	1857	-4	74	271	140	-135	274	88	-97	91	-99	1376	41	595	203	522	217	241	756	897	353	25.4108	5.73626	0.828419	1.61278	2.30963	2.77452	2.7185	2.33846	2.95279	1.40502	crioro	hyperhumid
36	A	AA	1	1b	Alp_tund_Carpathians	Hunedoara County	Romania	45.364	22.886	2275	-12	82	281	138	-152	291	59	-109	87	-112	978	36	405	154	303	173	254	842	550	325	16.9231	3.48276	0.651545	1.5563	2.19033	2.60746	2.48287	2.24055	2.74036	1.22848	crioro	hyperhumid
37	A	AA	1	1b	Alp_tund_Carpathians	Arges County	Romaina	45.5898	24.613	2106	-4	81	276	148	-146	294	94	-103	97	-106	954	37	389	143	317	151	241	772	609	378	16.1111	3.26804	0.630229	1.5682	2.15836	2.58995	2.50243	2.18184	2.78462	1.20713	crioro	hyperhumid
38	A	AA	1	1b	Alp_tund_Carpathians	Arges County	Romaina	45.5891	24.9717	2073	-2	82	274	150	-147	297	97	-102	100	-105	1049	45	467	150	386	157	238	765	695	391	17.7749	3.86	0.686636	1.65321	2.17898	2.66932	2.58771	2.19866	2.84198	1.24981	oro	hyperhumid
39	A	AA	1	1b	Alp_tund_Caucasus	Krasnodar Krai	Russia	43.8095	40.7332	2466	-5	74	265	141	-138	279	55	-78	97	-101	1398	15	415	275	410	278	246	779	757	353	21.4448	4.2268	0.718236	1.17609	2.44091	2.61805	2.61384	2.4456	2.8791	1.33132	crioro	hyperhumid
40	A	AA	1	1b	Alp_tund_Caucasus	Karachay-Cherkessia	Russia	43.4516	41.6068	2728	-13	72	259	131	-147	278	81	-110	90	-110	1017	24	345	159	336	159	254	851	603	309	19.5146	3.73333	0.675167	1.38021	2.20412	2.53782	2.52763	2.20412	2.78032	1.29036	crioro	hyperhumid
41	A	AA	1	1b	Alp_tund_Caucasus	Racha-Lechkhumi and Lower Svaneti	Georgia	42.8594	43.2346	2580	-1	82	270	154	-149	303	65	-105	108	-105	1370	16	418	259	403	259	237	770	773	412	18.7621	3.73148	0.674997	1.20412	2.41497	2.62118	2.60638	2.41497	2.88818	1.27328	oro	hyperhumid
42	A	AA	1	1b	Alp_tund_Caucasus	Mtskheta-Mtianeti	Georgia	42.6766	45.0258	2831	-19	90	280	146	-174	320	49	-124	92	-124	1007	36	414	158	270	160	266	928	544	316	17.2152	2.93478	0.594921	1.5563	2.2014	2.617	2.43297	2.20683	2.7356	1.23591	crioro	hyperhumid
43	A	AA	1	1b	Alp_tund_Caucasus	Shida Kartli	Georgia	42.5161	44.2581	2263	19	86	275	180	-133	313	87	-87	129	-87	886	24	327	174	229	174	215	628	582	550	10.5818	1.77519	0.443293	1.38021	2.24304	2.51455	2.36173	2.24304	2.76492	1.02456	oro	humid
44	A	AA	1	1b	Alp_tund_Caucasus	Guria	Georgia	41.8395	42.6422	2546	6	85	278	160	-145	305	-68	115	115	-98	1535	15	461	317	317	388	232	713	751	448	16.7634	2.75652	0.574786	1.17609	2.50243	2.6637	2.50243	2.58995	2.87564	1.22436	oro	hyperhumid
45	A	AA	1	1b	Alp_tund_Altai	Altai Republic	Russia	49.9685	85.7734	2718	-75	103	257	123	-279	402	61	-162	61	-219	646	54	290	52	290	70	317	1521	357	167	21.3772	4.7541	0.759977	1.73239	1.72428	2.4624	2.46389	1.85126	2.55267	1.32995	crioro	hyperhumid
46	A	AA	1	1b	Alp_tund_Altai	Altai Republic	Russia	49.8221	86.4551	2746	-74	102	253	123	-280	404	64	-208	64	-219	676	56	316	51	316	62	312	1508	385	174	22.1264	4.9375	0.773604	1.74819	1.716	2.49969	2.50106	1.79934	2.58546	1.34491	crioro	hyperhumid
47	A	AA	1	1b	Alp_tund_Altai	Altai Republic	Russia	49.786	87.5842	2426	-57	99	243	142	-266	409	79	-147	84	-207	296	68	162	24	159	31	279	1366	210	270	7.77778	1.89286	0.461327	1.83251	1.39794	2.20952	2.20412	1.50515	2.32222	0.890856	crioro	humid
48	A	AA	1	1b	Alp_tund_Altai	Altai Republic	Russia	49.1548	87.6376	2834	-76	98	242	124	-280	403	64	-169	64	-225	304	61	162	28	162	40	309	1541	174	176	9.88636	2.53125	0.547928	1.78533	1.4624	2.20952	2.21219	1.61278	2.24055	0.995037	crioro	humid
49	A	AA	1	1b	Alp_tund_Altai	East Kazakhstan Region	Kazakhstan	49.1059	85.2755	2532	-62	102	255	140	-261	401	76	-155	76	-207	489	50	216	46	216	59	297	1403	310	238	13.0252	2.84211	0.584569	1.69897	1.6721	2.33445	2.33646	1.77815	2.49136	1.11478	crioro	hyperhumid
50	A	AA	1	1b	Alp_tund_Tian_Shan	Xinjiang	China	43.7512	84.4293	3344	-56	104	274	123	-258	381	59	-179	60	-189	222	77	131	15	112	17	317	1294	169	184	9.18478	1.86667	0.457377	1.88649	1.20412	2.11727	2.05308	1.25527	2.22789	0.963069	crioro	humid
51	A	AA	1	1b	Alp_tund_Tian_Shan	Xinjiang	China	43.7537	84.1769	2934	-33	107	275	148	-240	388	83	-158	84	-169	277	70	148	20	140	22	279	1089	205	304	6.74342	1.66667	0.425969	1.8451	1.32222	2.17026	2.14922	1.36173	2.31175	0.82888	crioro	humid
52	A	AA	1	1b	Alp_tund_Tian_Shan	Xinjiang	China	43.3869	85.2924	3360	-54	100	279	114	-245	359	55	-170	56	-180	237	76	135	16	125	18	320	1257	182	171	10.6433	2.23214	0.509491	1.88081	1.23045	2.13033	2.10037	1.27875	2.26007	1.02708	crioro	humid
53	A	AA	1	1b	Alp_tund_Tian_Shan	Xinjiang	China	43.8559	84.0419	3249	-53	108	274	132	-262	393	66	-179	67	-190	280	73	152	17	141	19	308	1269	209	216	9.67593	2.10448	0.491989	1.86332	1.25527	2.18184	2.15229	1.30103	2.32015	0.985693	crioro	humid
54	A	AA	1	1b	Alp_tund_Tian_Shan	Xinjiang	China	42.4601	80.4139	3663	-57	101	287	106	-246	352	47	-181	49	-181	504	55	218	38	209	38	347	1286	329	140	23.5	4.26531	0.721424	1.74036	1.59106	2.33846	2.32222	1.59106	2.5172	1.37107	crioro	hyperhumid
55	A	AA	1	1b	Alp_tund_Tibet	Tibet	China	34.5265	89.2523	4869	-54	119	339	114	-236	351	51	-154	57	-165	277	114	208	7	205	9	326	1263	231	165	14	3.59649	0.662426	2.0569	0.90309	2.31806	2.31387	1	2.36361	1.14613	crioro	hyperhumid
56	A	AA	1	1b	Alp_tund_Tibet	Xinjiang	China	36.3538	89.2973	4722	-69	125	343	103	-261	365	35	-166	43	-186	246	128	209	3	192	5	365	1431	194	101	19.2079	4.46512	0.737599	2.10721	0.60206	2.32015	2.28556	0.778151	2.2878	1.28348	crioro	hyperhumid
57	A	AA	1	1b	Alp_tund_Tibet	Xinjiang	China	36.5218	86.1199	4846	-84	122	345	87	-267	354	19	-131	26	-194	316	126	277	8	250	14	365	1610	178	53	33.5849	9.61538	1.02594	2.10037	0.954243	2.44248	2.39967	1.17609	2.25042	1.52614	crioro	hyperhumid
58	A	AA	1	1b	Alp_tund_Tibet	Ladakh	India	34.1704	77.4173	3420	-6	97	282	164	-180	344	-112	63	114	-122	86	40	32	10	29	26	247	842	35	410	0.853659	0.254386	0.0984312	1.60206	1.04139	1.50515	1.47712	1.43136	1.54407	-0.0687158	oro	arid
59	A	AA	1	1b	Alp_tund_Tibet	Ladakh	India	33.1112	79.1166	4176	-33	106	283	147	-228	376	93	-68	93	-154	87	71	55	8	55	16	273	1098	54	303	1.78218	0.591398	0.201779	1.85126	0.954243	1.74036	1.74819	1.23045	1.73239	0.250951	crioro	subarid
60	A	AA	1	1b	Alp_tund_Tibet	Tibet	China	31.6403	79.5316	4296	-28	101	292	128	-217	345	88	-57	88	-141	580	58	314	62	314	116	264	1018	325	298	10.906	3.56818	0.659743	1.76343	1.79934	2.49693	2.49831	2.06819	2.51188	1.03767	crioro	humid
61	A	AA	1	1b	Alp_tund_Tibet	Tibet	China	32.1881	86.634	4488	-5	119	345	157	-188	345	96	-89	98	-111	147	129	131	2	106	3	256	804	136	385	3.53247	1.08163	0.318404	2.11059	0.477121	2.11727	2.02938	0.60206	2.13354	0.548078	oro	dry
62	A	AA	1	1b	Alp_tund_Tibet	Tibet	China	30.4436	86.6439	4687	-12	113	344	135	-193	327	84	-109	84	-112	161	150	170	0	170	0	261	840	155	326	4.7546	2.02381	0.480554	2.17609	0	2.23045	2.233	0	2.19033	0.677114	crioro	subhumid
63	A	AA	1	1b	Alp_tund_Sa_Nevada	Andalusia	Spain	37.0525	-3.3148	3263	-9	102	365	141	-138	279	-64	76	76	-82	628	54	264	17	17	250	294	763	177	254	6.9685	0.223684	0.0876694	1.73239	1.25527	2.4216	1.25527	2.39967	2.24797	0.84314	crioro	humid
64	A	AA	1	1b	Alp_tund_Sa_Nevada	Andalusia	Spain	37.0862	-3.1957	2849	18	101	359	170	-111	282	-38	106	106	-56	602	51	243	21	21	230	244	546	180	424	4.24528	0.198113	0.0784979	1.70757	1.34242	2.38561	1.34242	2.36361	2.25527	0.627907	oro	subhumid
65	A	AA	1	1b	Alp_tund_Atlas	Marrakesh-Safi	Morocco	31.1816	-7.8313	3262	36	125	411	201	-103	304	-9	111	119	-38	322	54	130	15	15	98	246	378	219	534	4.10112	0.12605	0.0515578	1.73239	1.20412	2.11394	1.20412	1.99564	2.34044	0.612903	oro	subhumid
66	A	AA	1	1b	Alp_tund_Atlas	Marrakesh-Safi	Morocco	31.1545	-7.7952	3666	11	125	416	173	-128	300	-34	84	91	-62	313	53	126	15	15	96	296	579	85	351	2.42165	0.164835	0.0662645	1.72428	1.20412	2.10037	1.20412	1.98677	1.92942	0.384112	crioro	dry
67	A	AA	1	1b	Alp_tund_Armenia-Iran	Igdir Province	Turkey	39.7033	44.3407	3561	-30	102	287	150	-205	355	35	59	89	-143	364	54	183	51	57	51	288	1042	183	279	6.55914	0.640449	0.214963	1.73239	1.716	2.26245	1.76343	1.716	2.26245	0.816847	crioro	humid
68	A	AA	1	1b	Alp_tund_Armenia-Iran	Hakkari Province	Turkey	37.2983	44.2523	2768	28	105	286	231	-138	369	-7	157	157	-88	844	71	427	17	17	280	220	612	303	657	4.61187	0.10828	0.0446496	1.85126	1.25527	2.63043	1.25527	2.44871	2.48144	0.663877	oro	subhumid
69	A	AA	1	1b	Alp_tund_Armenia-Iran	Yazd Province	Iran	31.6877	54.0692	3099	87	132	340	282	-105	388	14	168	203	-33	233	94	138	1	4	119	168	269	119	1112	1.07014	0.0197044	0.00847431	1.97313	0.30103	2.13988	0.69897	2.07918	2.07555	0.0294422	supra	subarid
70	A	AA	1	1b	Alp_tund_Afghanistan	Gilgit-Baltistan	Pakistan	36.5923	73.4623	3573	-16	92	272	163	-176	339	-1	-58	108	-127	67	65	38	5	21	8	260	937	35	364	0.961538	0.194444	0.077166	1.81291	0.778151	1.57978	1.34242	0.954243	1.54407	-0.0170333	crioro	arid
71	A	AA	1	1b	Alp_tund_Afghanistan	Khyber Pakhtunkhwa	Pakistan	35.9126	71.8938	2808	36	94	290	205	-120	325	11	140	149	-70	477	74	296	39	42	116	210	515	229	659	3.47496	0.281879	0.107847	1.86923	1.60206	2.47129	1.63347	2.06819	2.35984	0.54095	oro	dry
72	A	AA	1	1b	Alp_tund_Rocky_Mts	Wyoming	USA	43.8571	-110.808	2415	26	108	303	230	-128	358	-84	150	150	-84	574	25	204	94	94	204	227	597	282	607	4.6458	0.626667	0.211299	1.39794	1.97772	2.30963	1.97772	2.31175	2.45025	0.66706	oro	subhumid
73	A	AA	1	1b	Alp_tund_Rocky_Mts	Wyoming	USA	43.7839	-110.845	2919	-2	108	308	199	-153	352	-109	118	118	-109	711	22	239	122	122	239	269	805	310	414	7.48792	1.0339	0.308329	1.34242	2.08991	2.3784	2.08991	2.38021	2.49136	0.874361	oro	humid
74	A	AA	1	1b	Alp_tund_Rocky_Mts	Montana	USA	45.3244	-110.077	3217	-29	111	324	166	-176	342	32	-120	87	-129	665	38	287	98	166	106	309	1021	363	262	13.855	1.90805	0.463601	1.57978	1.99564	2.45788	2.22272	2.02938	2.55991	1.14161	crioro	hyperhumid
75	A	AA	1	1b	Alp_tund_Rocky_Mts	Wyoming	USA	41.3711	-106.303	3475	-19	116	329	180	-173	353	-5	-114	99	-121	508	21	168	94	145	100	290	944	250	329	7.59878	1.46465	0.391755	1.32222	1.97772	2.22531	2.16435	2.00432	2.39794	0.880744	crioro	humid
76	A	AA	1	1b	Alp_tund_NZ	West Coast	New Zeland	-43.7211	169.964	1513	34	58	347	120	-47	167	24	-17	85	-17	4129	13	1148	825	930	825	181	298	3266	449	72.7394	10.9412	1.07705	1.11394	2.91698	3.05994	2.96895	2.91698	3.51402	1.86177	crioro	hyperhumid
77	A	AA	1	1b	Alp_tund_NZ	West Coast	New Zeland	-44.2099	168.564	1427	33	52	336	112	-43	155	70	-15	81	-15	4785	12	1365	956	1184	956	175	299	3791	423	89.6217	14.6173	1.19361	1.07918	2.98091	3.13513	3.07372	2.98091	3.57875	1.95241	crioro	hyperhumid
78	A	AA	1	1b	Alp_tund_NZ	West Coast	New Zeland	-43.6511	169.946	1780	38	56	344	122	-41	164	66	-13	88	-13	4793	15	1365	913	1114	913	167	268	3828	480	79.75	12.6591	1.13542	1.17609	2.96095	3.13513	3.04727	2.96095	3.58297	1.90173	oro	hyperhumid
79	A	AA	1	1b	Alp_tund_NZ	West Coast	New Zeland	-42.7855	171.775	1536	32	66	370	126	-53	179	41	85	85	-20	4136	16	1275	828	828	907	203	319	3222	434	74.2396	9.74118	1.03105	1.20412	2.91855	3.10551	2.91855	2.95809	3.50813	1.87064	crioro	hyperhumid
80	A	AA	1	1b	SE_Australia	New South Wales	Australia	-36.4404	148.277	1961	44	85	380	168	-55	224	31	112	112	-20	1425	18	460	262	262	345	200	291	1051	579	18.152	2.33929	0.523654	1.25527	2.41996	2.66276	2.41996	2.53908	3.0216	1.25892	oro	hyperhumid
81	A	AA	1	1b	SE_Australia	New South Wales	Australia	-36.4354	148.271	2004	41	85	380	166	-58	224	28	109	109	-23	1469	19	478	266	266	358	205	308	1081	554	19.5126	2.44037	0.536605	1.27875	2.42651	2.67943	2.42651	2.55509	3.03383	1.29032	oro	hyperhumid
82	A	AA	1	1c	Trop_Mts	Tajumulco	Guatemala	15.0427	-91.9037	3988	46	69	609	99	-15	114	51	36	56	31	3043	72	1436	117	745	133	126	65	3043	554	54.9278	13.3036	1.15544	1.85733	2.07188	3.15715	2.87274	2.1271	3.4833	1.73979	oro	hyperhumid
83	A	AA	1	1c	Trop_Mts_VE_CO_EC	Merida	Venezuela	8.8549	-70.9144	4430	21	62	729	61	-25	85	26	17	26	17	1424	42	552	130	552	130	365	342	1424	258	55.1938	21.2308	1.34695	1.62325	2.11727	2.74194	2.74273	2.11727	3.15351	1.74189	crioro	hyperhumid
84	A	AA	1	1c	Trop_Mts_VE_CO_EC	Merida	Venezuela	8.5307	-71.0613	4408	22	62	728	61	-24	85	23	19	27	18	1340	49	513	83	496	97	365	340	1340	260	51.5385	18.3704	1.28714	1.6902	1.92428	2.71012	2.69636	1.99123	3.1271	1.71213	crioro	hyperhumid
85	A	AA	1	1c	Trop_Mts_VE_CO_EC	Magdalena	Colombia	10.7896	-73.6665	4391	18	55	728	54	-22	76	16	15	23	14	1241	64	622	43	424	63	365	388	1241	212	58.5377	18.4348	1.28858	1.80618	1.64345	2.79379	2.62839	1.80618	3.09377	1.76744	crioro	hyperhumid
86	A	AA	1	1c	Trop_Mts	Boyaca	Colombia	6.41911	-72.2968	4564	24	66	769	65	-20	86	28	22	28	19	1918	44	728	140	526	596	365	308	1918	292	65.6849	18.7857	1.29635	1.64345	2.14922	2.86213	2.72181	2.77597	3.28285	1.81747	crioro	hyperhumid
87	A	AA	1	1c	Trop_Mts	Cauca	Colombia	2.93554	-76.03	5135	2	56	755	38	-36	74	2	0	4	-2	1931	35	692	221	666	261	365	577	1856	26	713.846	166.5	2.22401	1.54407	2.34635	2.84011	2.82413	2.4183	3.26858	2.8536	crioro	hyperhumid
88	A	AA	1	1c	Trop_Mts	Cauca	Colombia	2.31088	-76.3926	4546	31	57	749	67	-8	76	32	29	33	27	1932	36	763	237	598	267	123	227	1932	373	51.7962	18.1212	1.28152	1.5563	2.37658	2.88252	2.77743	2.42813	3.28601	1.7143	crioro	hyperhumid
89	A	AA	1	1c	Trop_Mts	Narino	Colombia	0.954611	-77.886	4597	22	50	730	56	-12	68	24	21	24	20	1663	27	536	231	516	500	336	342	1663	258	64.4574	21.5	1.35218	1.43136	2.36549	2.72916	2.71349	2.69984	3.22089	1.80927	crioro	hyperhumid
90	A	AA	1	1c	Trop_Mts_VE_CO_EC	Volcan Cayambe	Ecuador	0.007859	-78.0032	4592	25	56	673	66	-17	83	29	21	29	20	852	38	335	83	335	106	219	295	852	305	27.9344	11.5517	1.0987	1.57978	1.92428	2.52504	2.52634	2.02938	2.93044	1.44614	crioro	hyperhumid
91	A	AA	1	1c	Trop_Mts	Poyor	Peru	-9.37545	-77.671	4488	40	70	707	86	-14	100	43	34	43	34	638	80	378	7	128	7	115	121	638	479	13.3194	2.97674	0.599528	1.90309	0.90309	2.57749	2.11059	0.90309	2.80482	1.12449	oro	hyperhumid
92	A	AA	1	1c	Trop_Mts	Vaqueria	Peru	-9.06419	-77.6071	4431	48	73	696	97	-8	105	50	42	51	42	681	76	381	13	256	13	76	30	681	573	11.8848	5.01961	0.779568	1.88081	1.14613	2.58092	2.40993	1.14613	2.83315	1.07499	oro	humid
93	A	AA	1	1c	Trop_Mts_PE_BO_AR	Ancash region	Peru	-10.0291	-77.3999	4342	44	70	713	87	-11	98	49	36	49	36	688	101	526	4	526	4	95	74	688	526	13.0798	10.7347	1.06947	2.00432	0.69897	2.72099	2.72181	0.69897	2.83759	1.1166	oro	hyperhumid
94	A	AA	1	1c	Trop_Mts_PE_BO_AR	Ayacucho region	Peru	-14.5649	-73.6335	4560	42	96	618	111	-45	156	53	20	56	20	1021	90	632	25	269	25	204	117	1021	507	20.1381	4.80357	0.763695	1.95424	1.41497	2.80072	2.43136	1.41497	3.00903	1.30402	oro	hyperhumid
95	A	AA	1	1c	Trop_Mts_PE_BO_AR	Oruro department	Bolivia	-17.955	-68.3996	4205	55	131	588	157	-65	222	77	20	84	14	316	119	250	6	97	6	209	111	316	662	4.77341	1.15476	0.333399	2.07555	0.845098	2.39794	1.99123	0.845098	2.49969	0.678829	oro	subhumid
96	A	AA	1	1c	Trop_Mts_PE_BO_AR	Potosi department	Bolivia	-22.0401	-67.5953	4457	15	133	627	119	-94	213	48	-20	48	-25	51	171	54	0	54	0	365	425	51	246	2.07317	1.125	0.327359	2.233	0	1.73239	1.74036	0	1.70757	0.316635	crioro	dry
97	A	AA	1	1c	Trop_Mts_PE_BO_AR	Jujuy province	Argentina	-22.9191	-66.3348	4346	27	130	560	135	-97	232	57	-19	62	-23	195	136	168	0	166	0	305	322	195	377	5.17241	2.67742	0.565543	2.13354	0	2.22531	2.22272	0	2.29003	0.713693	crioro	subhumid
98	A	AA	1	1c	Trop_Mts	Puncak Mandala	Indonesia	-4.70185	140.293	4386	29	52	775	62	-5	67	30	24	32	23	5350	19	1785	1035	1357	1145	143	255	5350	345	155.072	42.4062	1.63755	1.27875	3.01536	3.25164	3.1329	3.05918	3.72835	2.19053	crioro	hyperhumid
99	A	AA	1	1c	Trop_Mts	Wilhelm Mountain	Papua New Guinea	-5.77894	145.03	4333	29	48	815	58	-2	59	30	26	31	26	3515	28	1210	491	895	517	103	256	3515	344	102.18	28.871	1.47525	1.44716	2.69197	3.08279	2.95231	2.71433	3.54593	2.00937	crioro	hyperhumid
100	A	AA	1	1c	Trop_Mts	Puncak Jaya	Indonesia	-4.04532	137.151	4526	25	47	754	58	-4	62	21	27	29	19	3923	16	1213	724	1013	1194	251	297	3923	303	129.472	34.931	1.55547	1.20412	2.86034	3.08386	3.00604	3.07737	3.59362	2.11218	crioro	hyperhumid
101	A	AA	1	1c	Trop_Mts	Mt. Cameroon	Cameroon	4.21489	9.1714	3884	33	28	616	59	13	46	24	35	39	24	4072	79	2392	82	686	2392	0	211	4072	389	104.679	17.5897	1.26927	1.89763	1.91908	3.37876	2.83696	3.37894	3.60981	2.01986	crioro	hyperhumid
102	A	AA	1	1c	Trop_Mts_Kilimanjaro	Kilimanjaro retion	Tanzania	-3.0729	37.399	4523	30	92	675	95	-41	136	38	22	40	15	1266	74	718	61	379	108	365	247	1266	353	35.864	9.475	1.02015	1.86923	1.79239	2.85612	2.57978	2.03743	3.10243	1.55466	crioro	hyperhumid
103	A	AA	1	1c	Trop_Mts_Kenia	Meru county	Kenya	-0.1549	37.3431	4415	39	96	746	105	-24	129	46	40	48	28	1604	62	777	181	708	229	365	135	1604	465	34.4946	14.75	1.19728	1.79239	2.26007	2.89042	2.85065	2.36173	3.2052	1.53775	oro	hyperhumid
104	A	AA	1	1c	Trop_Mts_Ruwenzori	Western Region	Uganda	0.3745	29.879	4682	20	70	802	65	-22	88	18	21	25	17	1334	34	494	193	384	450	365	356	1334	244	54.6721	15.36	1.21378	1.53148	2.2878	2.69373	2.58546	2.65418	3.12516	1.73777	crioro	hyperhumid
105	A	AA	1	1c	Trop_Mts_Etiopia	Amhara Region	Ethiopia	13.2323	38.3635	4274	54	107	604	143	-34	177	46	48	80	39	1293	125	1149	13	203	27	187	36	1293	651	19.8618	2.5375	0.548696	2.09691	1.14613	3.06032	2.30963	1.44716	3.1116	1.29802	oro	hyperhumid
106	A	AA	1	1c	Trop_Mts	Sanetti Plateau	Ethiopia	6.84014	39.7349	4174	59	82	603	130	-6	136	55	52	70	52	1282	59	589	71	219	71	69	0	1282	706	18.1586	3.12857	0.6158	1.77085	1.85733	2.77012	2.34242	1.85733	3.10789	1.25908	oro	hyperhumid
107	A	AA	1	1c	Trop_Mts_Etiopia	Amhara Region	Ethiopia	12.1468	39.1813	4116	68	100	599	149	-18	167	70	48	88	48	1029	113	896	31	171	31	113	6	1029	813	12.6568	1.94318	0.468817	2.05308	1.50515	2.95231	2.23553	1.50515	3.01242	1.10232	oro	hyperhumid
108	A	AA	2	2a	Taiga_Eurasia	Vasterbotten County	Sweden	64.0454	17.6856	330	20	65	210	188	-122	311	134	-59	139	-89	654	31	248	107	244	112	202	660	433	575	7.53043	1.7554	0.440184	1.49136	2.03342	2.39445	2.38917	2.05308	2.63649	0.87682	oro	humid
109	A	AA	2	2a	Taiga_Eurasia	Northern Savonia	Finland	63.6454	27.0556	157	26	64	190	207	-129	336	148	-66	156	-99	652	34	265	98	223	101	191	652	443	656	6.75305	1.42949	0.385515	1.53148	1.99564	2.42325	2.35025	2.0086	2.6464	0.8295	oro	humid
110	A	AA	2	2a	Taiga_Eurasia	Komi Republic	Russia	63.0755	47.6745	178	6	66	168	212	-177	390	141	-87	157	-139	592	36	226	76	219	105	207	865	427	597	7.15243	1.3949	0.379288	1.5563	1.88649	2.35411	2.34242	2.02531	2.63043	0.854454	oro	humid
111	A	AA	2	2a	Taiga_Eurasia	Khanty-Mansi Autonomous Okrug	Russia	62.5148	61.7354	39	-5	71	162	223	-217	441	150	-102	168	-177	513	45	218	57	216	82	211	1028	356	618	5.76052	1.28571	0.359022	1.65321	1.76343	2.33846	2.33646	1.91908	2.55145	0.760462	oro	subhumid
112	A	AA	2	2a	Taiga_Eurasia	Yamalo-Nenets Autonomous Okrug	Russia	63.4045	80.7056	136	-42	67	144	209	-260	469	142	-153	154	-222	545	40	218	69	207	89	235	1382	307	509	6.03143	1.34416	0.369986	1.60206	1.8451	2.33846	2.31806	1.95424	2.48714	0.780421	oro	humid
113	A	AA	2	2a	Taiga_Eurasia	Krasnoyarsk Krai	Russia	63.4644	92.2843	335	-61	66	126	207	-312	520	140	-180	152	-274	578	36	220	72	195	112	238	1603	315	496	6.35081	1.28289	0.358486	1.5563	1.86332	2.34242	2.29226	2.05308	2.49831	0.802829	oro	humid
114	A	AA	2	2a	Taiga_Eurasia	Zabaykalsky Krai	Russia	54.3539	116.306	927	-51	100	174	215	-361	576	150	-256	161	-296	459	102	327	12	305	15	231	1542	392	583	6.72384	1.89441	0.46156	2.0086	1.11394	2.51455	2.48572	1.20412	2.59329	0.827618	oro	humid
115	A	AA	2	2a	Taiga_Eurasia	Sakha Republic	Russia	64.1867	119.181	169	-85	76	124	228	-383	610	151	-233	169	-347	240	62	123	20	120	29	238	1937	162	561	2.8877	0.710059	0.233011	1.79239	1.32222	2.08991	2.08279	1.47712	2.20952	0.460552	oro	dry
116	A	AA	2	2a	Taiga_Eurasia	Sakha Republic	Russia	60.6418	136.125	275	-88	78	120	234	-420	653	159	-241	176	-387	298	65	154	22	144	27	229	2036	205	625	3.28	0.818182	0.259637	1.81291	1.36173	2.18752	2.16137	1.44716	2.31175	0.515874	oro	dry
117	A	AA	2	2a	Taiga_Eurasia	Kamchatka Krai	Russia	56.4055	157.685	661	-36	66	165	159	-238	398	111	-141	111	-191	572	61	289	43	289	62	240	1197	346	383	9.03394	2.6036	0.556737	1.78533	1.64345	2.4609	2.4624	1.79934	2.53908	0.955877	oro	humid
118	A	AA	2	2a	Taiga_NAmer	Alaska	USA	64.8349	-150.435	90	-14	70	157	217	-228	445	154	-35	173	-196	348	64	196	35	159	59	212	1184	237	664	3.56928	0.919075	0.283092	1.80618	1.5563	2.29226	2.20412	1.77815	2.37475	0.55258	oro	dry
119	A	AA	2	2a	Taiga_NAmer	Yukon	Canada	63.1354	-133.214	1091	-45	71	176	163	-237	401	116	-67	116	-204	394	39	156	43	156	79	245	1311	221	400	5.525	1.34483	0.370111	1.59106	1.64345	2.19312	2.1959	1.90309	2.34439	0.742332	oro	subhumid
120	A	AA	2	2a	Taiga_NAmer	Northwest Territories	Canada	60.2344	-119.866	442	-18	87	187	215	-250	465	157	-191	157	-212	389	46	172	54	172	61	215	1190	260	621	4.1868	1.09554	0.321296	1.66276	1.74036	2.23553	2.23805	1.79239	2.41497	0.621882	oro	subhumid
121	A	AA	2	2a	Taiga_NAmer	Saskatchewan	Canada	59.5741	-109.591	264	-18	67	149	202	-249	451	154	-197	154	-209	355	41	144	50	144	55	209	1167	239	609	3.92447	0.935065	0.286696	1.61278	1.70757	2.15836	2.16137	1.74819	2.3784	0.593781	oro	subhumid
122	A	AA	2	2a	Taiga_NAmer	Manitoba	Canada	54.3939	-97.1642	224	-7	87	180	234	-252	486	171	-194	171	-205	477	51	219	53	219	63	210	1104	343	689	4.97823	1.2807	0.358068	1.70757	1.73239	2.34044	2.34242	1.80618	2.53529	0.697075	oro	subhumid
123	A	AA	2	2a	Taiga_NAmer	Ontario	Canada	49.0645	-86.7355	323	18	67	184	185	-179	365	124	-81	149	-126	734	21	238	131	217	133	187	733	486	653	7.44257	1.45638	0.390295	1.32222	2.12057	2.37658	2.33846	2.1271	2.68664	0.871723	oro	humid
124	A	AA	2	2a	Taiga_NAmer	Ontario	Canada	47.4153	-80.5042	434	27	88	211	226	-192	418	130	-83	168	-130	885	22	293	161	268	164	189	732	577	768	7.51302	1.59524	0.414177	1.34242	2.20952	2.46687	2.42975	2.21748	2.76118	0.875815	oro	humid
125	A	AA	2	2a	Taiga_NAmer	Quebec	Canada	50.9081	-68.9242	478	0	76	183	199	-219	418	144	-164	146	-164	922	24	318	160	298	185	208	927	547	603	9.07131	2.0411	0.48303	1.38021	2.20683	2.50243	2.47567	2.26951	2.73799	0.95767	oro	humid
126	A	AA	2	2b	Alp_tund_Tibet	Qinghai	China	37.966	99.7824	3883	-45	118	313	123	-252	375	60	-168	64	-168	552	111	396	3	393	3	313	1167	502	198	25.3535	6.14062	0.853736	2.04532	0.60206	2.5977	2.5955	0.60206	2.7007	1.40404	crioro	hyperhumid
127	A	AA	2	2b	Mountain_conifers_N_America	British Columbia	Canada	49.6306	-116.5	1663	24	93	284	207	-120	327	-85	141	141	-85	454	28	171	81	81	171	216	606	225	588	3.82653	0.574468	0.197134	1.44716	1.91381	2.233	1.91381	2.23553	2.35218	0.582805	oro	subhumid
128	A	AA	2	2b	Mountain_conifers_N_America	Montana	USA	47.4467	-115.32	1751	35	101	315	223	-99	322	-64	147	147	-64	937	37	371	113	113	371	216	505	407	631	6.45008	0.768707	0.247656	1.5682	2.0569	2.56937	2.0569	2.57054	2.60959	0.809565	oro	humid
129	A	AA	2	2b	Mountain_conifers_N_America	Montana	USA	47.1189	-113.065	2050	23	106	317	215	-119	335	84	-41	138	-78	582	29	234	103	128	171	234	598	354	555	6.37838	0.927536	0.285003	1.4624	2.01703	2.36922	2.11059	2.23553	2.549	0.80471	oro	humid
130	A	AA	2	2b	Mountain_conifers_N_America	California	USA	39.2726	-120.32	2255	55	123	373	243	-88	331	-34	157	157	-34	1471	76	804	48	48	804	207	345	730	746	9.78552	0.305732	0.115854	1.88081	1.6902	2.90526	1.6902	2.9058	2.86332	0.990584	oro	humid
131	A	AA	2	2b	Mountain_conifers_N_America	Colorado	USA	39.3743	-107.015	2241	58	121	330	256	-112	367	33	130	174	-50	403	9	111	84	98	102	199	386	270	836	3.22967	0.563218	0.19402	0.954243	1.92942	2.04532	1.99564	2.01284	2.43136	0.509157	supra	dry
132	A	AA	2	2b	Alp_tund_Rocky_Mts	Colorado	USA	40.0627	-105.936	2448	43	126	350	238	-121	360	157	3	157	-59	285	14	86	59	86	65	219	463	179	703	2.54623	0.547771	0.189707	1.14613	1.77815	1.9345	1.93952	1.81954	2.25285	0.405898	oro	dry
133	A	AA	2	2b	Mt_Conifers_Europe	Nouvelle-Aquitaine region	France	42.8464	-0.616746	1940	45	88	355	184	-64	248	-10	126	126	-24	1736	17	538	319	319	481	194	323	1272	610	20.8525	2.53175	0.547989	1.23045	2.50515	2.73078	2.50515	2.68305	3.10449	1.31916	oro	hyperhumid
134	A	AA	2	2b	Mt_Conifers_Europe	Aragon	Spain	42.6161	0.5836	2272	20	88	344	162	-93	255	24	-50	104	-52	1241	15	387	251	273	289	232	522	635	426	14.9061	2.625	0.559308	1.17609	2.4014	2.58771	2.43775	2.4624	2.80277	1.17336	oro	hyperhumid
135	A	AA	2	2b	Mt_Conifers_Europe	Catalonia	Spain	42.6586	1.3052	1734	51	87	334	195	-65	261	58	-21	137	-23	978	14	297	200	231	236	183	311	753	676	11.1391	1.68613	0.429127	1.14613	2.3032	2.47276	2.36549	2.37475	2.87679	1.04685	oro	humid
136	A	AA	2	2b	Mt_Conifers_Europe	Piedmont region	Italy	46.1612	8.24287	1844	30	80	294	175	-96	271	54	-56	123	-56	1558	34	572	224	361	224	202	486	1089	550	19.8	2.93496	0.59494	1.53148	2.35218	2.7574	2.55871	2.35218	3.03703	1.29667	oro	hyperhumid
137	A	AA	2	2b	Mt_Conifers_Europe	Tyrol	Austria	47.2714	11.086	1791	23	84	307	164	-109	273	109	-61	114	-64	1179	43	524	184	500	195	214	534	839	503	16.6799	4.38596	0.731264	1.63347	2.26717	2.71933	2.69984	2.29226	2.92376	1.22219	oro	hyperhumid
138	A	AA	2	2b	Mt_Conifers_Europe	Trentino-South Tyrol	Italy	46.6071	11.4606	2002	17	82	297	159	-118	277	110	-67	110	-72	963	38	360	119	360	121	220	580	719	465	15.4624	3.27273	0.630705	1.57978	2.07918	2.5563	2.55751	2.08636	2.85673	1.18928	oro	hyperhumid
139	A	AA	2	2b	Mt_Conifers_Europe	Presov Region	Slovakia	49.1521	20.1176	2067	-17	74	273	125	-147	273	74	-110	77	-112	1288	33	497	196	444	219	262	874	720	282	25.5319	5.76623	0.830347	1.51851	2.29447	2.69636	2.64836	2.34242	2.85733	1.40708	crioro	hyperhumid
140	A	AA	2	2b	Mt_Conifers_Europe	Valcea County	Romania	45.379	23.7265	1830	14	81	274	167	-129	295	89	-85	116	-89	900	37	371	136	295	148	218	644	650	500	13	2.5431	0.549384	1.5682	2.13672	2.56937	2.47129	2.17319	2.81291	1.11394	oro	hyperhumid
141	A	AA	2	2b	Mt_Conifers_Europe	Hunedoara County	Romania	45.28	22.7992	1836	14	82	277	167	-129	296	87	-52	115	-88	927	37	383	147	305	163	219	644	659	498	13.2329	2.65217	0.562551	1.5682	2.17026	2.5832	2.48572	2.21484	2.81889	1.12166	oro	hyperhumid
142	A	AA	2	2b	Mt_Conifers_Medit	Aragon	Spain	40.0953	-0.997195	1860	68	93	345	222	-49	271	91	-2	158	-6	501	29	174	85	102	90	170	211	438	822	5.32847	0.64557	0.216316	1.4624	1.9345	2.24055	2.01284	1.95904	2.64147	0.726602	supra	subhumid
143	A	AA	2	2b	Mt_Conifers_Medit	Andalusia	Spain	37.3715	-2.85451	2097	67	102	351	225	-65	290	6	160	160	-11	640	45	232	32	32	223	177	228	419	823	5.09113	0.2	0.0791812	1.65321	1.51851	2.36549	1.51851	2.35025	2.62221	0.706814	supra	subhumid
144	A	AA	2	2b	Mt_Conifers_Medit	Marrakesh-Safi	Morocco	31.2826	-7.46566	3084	49	123	407	214	-89	303	4	125	133	-25	383	53	157	17	17	114	223	301	264	651	4.0553	0.12782	0.0522396	1.72428	1.25527	2.1959	1.25527	2.0607	2.4216	0.608023	oro	subhumid
145	A	AA	2	2b	Mt_Conifers_Medit	Peloponnese Region	Greece	36.9806	22.3482	1924	60	63	271	189	-45	233	10	139	148	-15	1109	79	630	27	46	416	150	262	601	744	8.07796	0.310811	0.11754	1.89763	1.44716	2.79934	1.6721	2.62014	2.77887	0.907302	oro	humid
146	A	AA	2	2b	Mt_Conifers_Medit	Crete	Greece	35.2855	24.0458	2174	51	12	81	131	-21	152	-2	126	126	-10	898	86	523	5	5	476	104	252	569	632	9.00316	0.0396825	0.0169008	1.9345	0.778151	2.7185	0.778151	2.67852	2.75511	0.954395	oro	humid
147	A	AA	2	2b	Conif_Altai	Altai Republic	Russia	50.1307	86.868	1956	-32	101	246	167	-244	411	109	-170	109	-182	526	68	277	33	277	39	254	1142	376	392	9.59184	2.54128	0.549161	1.83251	1.53148	2.44248	2.44404	1.60206	2.57519	0.981902	oro	humid
148	A	AA	2	2b	Conif_Altai	Altai Republic	Russia	50.2356	87.6005	1474	-7	102	242	196	-224	419	137	-149	137	-161	204	83	126	12	126	14	227	964	178	537	3.31471	0.919708	0.283235	1.91908	1.11394	2.10037	2.1038	1.17609	2.25042	0.520446	oro	dry
149	A	AA	2	2b	Conif_Altai	Xinjiang	China	48.7664	86.9768	1874	-22	102	244	186	-233	419	123	-120	123	-177	378	36	149	47	149	68	242	1085	209	466	4.48498	1.21138	0.344664	1.5563	1.68124	2.17319	2.17609	1.83885	2.32015	0.65176	oro	subhumid
150	A	AA	2	2b	Conif_Altai	East Kazakhstan Region	Kazakhstan	48.9852	86.0289	1904	-25	103	247	182	-233	415	120	-121	120	-176	452	22	143	75	143	100	248	1094	212	447	4.74273	1.19167	0.340775	1.34242	1.88081	2.15534	2.15836	2.00432	2.32634	0.676028	oro	subhumid
151	A	AA	2	2b	Mt_Conif_EastAsia	Jilin	China	42.0188	127.954	1668	-7	88	203	189	-245	434	149	-165	149	-180	1460	93	990	55	990	58	219	999	1314	582	22.5773	6.6443	0.883337	1.96848	1.74819	2.99564	2.99607	1.77085	3.1186	1.35367	oro	hyperhumid
152	A	AA	2	2b	Mt_Conif_EastAsia	Jilin	China	42.0633	128.116	1685	-8	89	204	187	-246	433	147	-165	147	-181	939	95	646	35	646	37	221	1007	846	571	14.8161	4.39456	0.731956	1.97772	1.5563	2.81023	2.8109	1.57978	2.92737	1.17073	oro	hyperhumid
153	A	AA	2	2b	Boreal_Chile	Magallanes and Chilean Antarctica	Chile	-55.1654	-67.6648	241	46	38	347	103	-7	109	79	40	81	11	571	14	165	113	151	133	85	158	571	554	10.3069	1.8642	0.457003	1.14613	2.0569	2.21748	2.18184	2.1271	2.75664	1.01313	oro	humid
154	B	BA	3	3a	Temp_Decid_For_ENA	Minnesota	USA	44.0354	-93.6839	320	77	90	217	280	-134	414	219	-74	219	-83	776	51	328	64	328	70	151	459	707	1141	6.19632	1.49772	0.397543	1.70757	1.81291	2.51587	2.5172	1.85126	2.84942	0.792134	supra	humid
155	B	BA	3	3a	Temp_Decid_For_ENA	Indiana	USA	40.7748	-86.5238	219	109	86	241	288	-70	357	231	-20	231	-23	975	25	338	148	338	174	115	208	811	1355	5.98524	1.4632	0.3915	1.39794	2.17319	2.52892	2.5302	2.24304	2.90902	0.777082	supra	subhumid
156	B	BA	3	3a	Temp_Decid_For_ENA	West Virginia	USA	39.5461	-78.4469	181	125	83	255	289	-37	326	204	11	236	11	818	14	243	159	227	172	89	105	818	1495	5.47157	0.961864	0.292669	1.14613	2.20412	2.38561	2.35793	2.23805	2.91275	0.738112	meso	subhumid
157	B	BA	3	3a	Temp_Decid_For_ENA	Connecticut	USA	41.4156	-72.1844	80	108	56	193	252	-37	289	42	170	220	0	1196	10	337	257	306	269	90	143	1101	1299	8.47575	1.39091	0.378563	1	2.41162	2.52763	2.48714	2.43136	3.04179	0.928178	supra	humid
158	B	BA	3	3a	Temp_Decid_For_ENA	Missouri	USA	37.6555	-91.5344	350	129	88	257	300	-44	344	163	14	245	5	976	19	309	160	254	170	90	113	926	1548	5.98191	1.03673	0.308934	1.27875	2.20683	2.48996	2.40654	2.233	2.96661	0.77684	meso	subhumid
159	B	BA	3	3a	Temp_Decid_For_ENA	Wisconsin	USA	44.0287	-88.9223	236	81	90	228	276	-121	397	182	-62	216	-66	769	39	282	87	279	95	147	395	677	1148	5.89721	1.29167	0.360151	1.59106	1.94448	2.45025	2.44716	1.98227	2.83059	0.770647	supra	subhumid
160	B	BA	3	3a	Temp_Decid_For_ENA	Michigan	USA	43.2121	-84.5992	222	89	85	237	274	-85	359	180	-42	214	-42	774	25	250	109	219	109	135	300	650	1178	5.51783	1.02336	0.306074	1.39794	2.04139	2.39794	2.34242	2.04139	2.81291	0.741768	supra	subhumid
161	B	BA	3	3a	Temp_Decid_For_ENA	Kentucky	USA	37.2614	-83.8155	322	137	83	272	287	-18	305	239	160	240	28	1117	15	331	204	290	286	64	49	1117	1646	6.78615	1.20833	0.344065	1.17609	2.31175	2.51983	2.46389	2.45788	3.04805	0.831623	meso	humid
162	B	BA	3	3a	Temp_Decid_For_ENA	Iowa	USA	41.9048	-91.8275	250	96	90	229	288	-104	392	197	-45	230	-53	882	43	343	87	337	94	133	318	788	1287	6.12277	1.46522	0.391855	1.63347	1.94448	2.53529	2.52892	1.97772	2.89653	0.786948	supra	humid
163	B	BA	3	3a	Temp_Decid_For_ENA	North Carolina	USA	35.1147	-80.2554	154	162	88	297	305	10	294	258	129	258	60	1306	16	412	261	412	324	0	0	1306	1942	6.72503	1.5969	0.414455	1.20412	2.4183	2.6149	2.61595	2.51188	3.11594	0.827694	thermo	humid
164	B	BA	3	3a	Temp_Decid_For_WEA	Galicia	Spain	43.2343	-7.6351	484	123	66	368	222	42	180	75	181	181	75	1467	42	558	134	134	558	0	0	1467	1482	9.89879	0.740331	0.240632	1.62325	2.13033	2.74663	2.13033	2.74741	3.16643	0.995582	meso	humid
165	B	BA	3	3a	Temp_Decid_For_WEA	Cantabria	Spain	43.2952	-3.7543	694	110	72	356	221	19	202	66	168	177	53	1681	29	589	235	257	522	0	0	1681	1326	12.6772	1.45198	0.389516	1.4624	2.37291	2.77012	2.41162	2.7185	3.22557	1.10302	supra	hyperhumid
166	B	BA	3	3a	Temp_Decid_For_WEA	Nouvelle-Aquitaine region	France	43.2932	-1.3967	474	121	77	345	243	19	223	102	187	195	55	1695	17	520	303	334	463	0	0	1695	1453	11.6655	1.71282	0.433421	1.23045	2.48287	2.716	2.52504	2.66652	3.22917	1.0669	meso	humid
167	B	BA	3	3a	Temp_Decid_For_WEA	Brittany	France	48.0943	-3.0754	182	110	48	300	198	37	161	76	161	168	60	993	29	360	165	178	289	0	0	993	1326	7.48869	1.05952	0.313767	1.4624	2.22011	2.5563	2.25285	2.4624	2.99695	0.874406	supra	humid
168	B	BA	3	3a	Temp_Decid_For_WEA	County Longford	Ireland	53.5833	-7.8846	40	99	55	345	190	30	160	54	80	153	54	922	17	281	186	226	281	0	0	922	1188	7.76094	1.47712	0.393948	1.23045	2.27184	2.44871	2.35603	2.45025	2.96473	0.889914	supra	humid
169	B	BA	3	3a	Temp_Decid_For_WEA	Centre-Val de Loire	France	47.5957	1.9937	124	116	74	315	247	13	234	58	95	198	44	706	11	203	152	158	191	0	12	706	1394	5.06456	0.79798	0.254785	1.04139	2.18469	2.3075	2.2014	2.2833	2.8488	0.704542	supra	subhumid
170	B	BA	3	3a	Temp_Decid_For_WEA	England	United Kingdom	52.6861	-1.2065	92	97	63	328	206	13	193	53	54	163	41	595	10	163	124	158	130	0	23	595	1165	5.1073	0.969325	0.294317	1	2.09691	2.21219	2.2014	2.11727	2.77452	0.708191	supra	subhumid
171	B	BA	3	3a	Temp_Decid_For_WEA	Rhineland-Palatinate	Germany	50.1145	6.3757	460	82	70	295	212	-26	238	24	63	165	5	998	14	308	207	241	248	98	144	998	988	10.1012	1.46061	0.391042	1.14613	2.31806	2.48855	2.38382	2.3962	2.99913	1.00437	supra	humid
172	B	BA	3	3a	Temp_Decid_For_WEA	Brandeburg	Germany	51.7633	13.2747	86	96	68	269	236	-19	255	189	9	189	9	543	22	185	99	185	99	86	123	543	1154	4.70537	0.978836	0.29641	1.34242	2	2.26717	2.26951	2	2.7348	0.672594	supra	subhumid
173	B	BA	3	3a	Temp_Decid_For_WEA	Lublin Voivodeship	Poland	51.7038	21.9656	174	81	70	249	233	-49	282	182	-20	183	-20	592	34	236	89	221	89	126	249	492	1025	4.8	1.20765	0.34393	1.53148	1.95424	2.37291	2.34635	1.95424	2.69197	0.681241	supra	subhumid
174	B	BA	3	3a	Temp_Decid_For_WEA	Emilia-Romagna	Italy	44.3847	11.3832	190	140	85	288	296	2	294	112	234	240	44	750	21	249	128	145	187	0	10	750	1676	4.47494	0.604167	0.205249	1.32222	2.11059	2.3962	2.16435	2.27416	2.87506	0.650787	meso	subhumid
175	B	BA	3	3a	Temp_Decid_For_WEA	Osijek-Baranja County	Croatia	45.6146	18.7965	77	119	86	280	280	-29	309	196	16	223	10	641	20	217	117	184	130	87	105	641	1421	4.51091	0.825112	0.26129	1.30103	2.07188	2.33646	2.26717	2.11727	2.80686	0.654264	meso	subhumid
176	B	BA	3	3a	Temp_Decid_For_WEA	Jambol province	Bulgaria	42.3944	26.1947	212	126	88	283	286	-24	310	199	202	233	21	577	20	192	112	122	131	81	76	577	1507	3.8288	0.523605	0.182872	1.30103	2.05308	2.2833	2.08991	2.12057	2.76118	0.583063	meso	subhumid
177	B	BA	3	3a	Temp_Decid_For_WEA	Kastamonu Province	Tturkey	41.8951	33.0244	90	141	61	242	273	23	251	83	228	237	52	1043	36	417	154	183	278	0	0	1043	1696	6.14976	0.772152	0.248501	1.5563	2.19033	2.62014	2.26482	2.4456	3.01828	0.788858	meso	humid
178	B	BA	3	3a	Temp_Decid_For_WEA	Mazandaran Province	Iran	36.3061	52.2545	1419	116	66	237	257	-21	277	99	210	218	15	787	30	289	105	130	203	79	90	787	1389	5.66595	0.59633	0.203123	1.47712	2.02531	2.4609	2.11727	2.30963	2.89597	0.753272	supra	subhumid
179	B	BA	3	3a	Temp_Decid_For_WEA	Kronoberg County	Sweden	56.8238	14.4564	169	67	65	254	208	-49	257	157	-3	159	-18	652	22	209	115	202	120	138	254	512	840	6.09524	1.27044	0.35611	1.34242	2.06446	2.32015	2.3075	2.08279	2.70927	0.784991	supra	humid
180	B	BA	3	3a	Temp_Decid_For_WEA	Masovian Voivodeship	Poland	53.1856	20.7451	166	75	69	250	225	-52	277	173	-24	176	-24	621	33	238	91	222	91	133	270	513	961	5.33819	1.26136	0.35437	1.51851	1.96379	2.37658	2.3483	1.96379	2.71012	0.727394	supra	subhumid
181	B	BA	3	3a	Temp_Decid_For_WEA	Samegrelo-Zemo Svaneti	Georgia	42.5143	42.4362	756	109	78	264	256	-38	295	34	136	215	4	1765	11	514	363	409	450	104	131	1765	1314	13.4323	1.90233	0.462746	1.04139	2.5611	2.71096	2.61278	2.65418	3.24674	1.12815	supra	hyperhumid
182	B	BA	3	3a	Temp_Decid_For_WEA	Utena County	Lithuania	55.4323	25.9547	159	62	66	221	221	-78	299	171	-48	171	-48	633	26	226	102	226	102	149	369	473	877	5.39339	1.32164	0.365794	1.41497	2.01284	2.35411	2.35603	2.01284	2.67486	0.731862	supra	subhumid
183	B	BA	3	3a	Temp_Decid_For_WEA	Vitsebsk Voblasts	Belarus	54.9231	30.323	153	61	68	214	227	-90	317	178	-58	178	-58	636	35	259	95	259	95	154	413	493	893	5.52072	1.45506	0.390061	1.54407	1.98227	2.4133	2.41497	1.98227	2.69285	0.741995	supra	subhumid
184	B	BA	3	3a	Temp_Decid_For_WEA	Moscow Oblast	Russia	55.1901	37.2881	189	53	69	201	232	-111	343	182	-42	182	-78	621	31	237	93	237	101	164	502	425	883	4.81314	1.3022	0.362143	1.49136	1.97313	2.37475	2.37658	2.0086	2.62839	0.682428	supra	subhumid
185	B	BA	3	3a	Temp_Decid_For_WEA	Kostroma Oblast	Russia	58.1695	44.7313	132	36	69	186	232	-137	369	179	-59	179	-104	643	33	248	88	248	101	179	640	449	806	5.57072	1.38547	0.377575	1.51851	1.94939	2.39445	2.3962	2.0086	2.65225	0.745911	supra	subhumid
186	B	BA	3	3a	Temp_Decid_For_WEA	Kirov Oblast	Russia	58.0131	50.9945	199	24	72	186	228	-159	387	173	-76	173	-124	611	32	235	91	235	97	189	752	421	752	5.5984	1.35838	0.372614	1.50515	1.96379	2.37107	2.37291	1.99123	2.62428	0.748064	oro	subhumid
187	B	BA	3	3a	Temp_Decid_For_EA	Primorsky Krai	Russia	43.5307	132.048	68	60	80	188	254	-174	427	182	-100	215	-118	629	69	336	30	305	32	158	583	547	1053	5.19468	1.4186	0.383565	1.83885	1.49136	2.52634	2.48572	1.51851	2.73799	0.715559	supra	subhumid
188	B	BA	3	3a	Temp_Decid_For_EA	South Pyongan Province	North Korea	39.719	126.136	285	89	86	207	272	-144	416	235	-60	235	-77	969	110	778	35	778	37	140	395	931	1260	7.38889	3.31064	0.634542	2.04139	1.5563	2.89098	2.89154	1.57978	2.96895	0.868579	supra	humid
189	B	BA	3	3a	Temp_Decid_For_EA	North Jeolla Province	South Korea	35.9148	127.334	638	103	84	250	266	-70	336	229	-24	229	-24	1666	75	992	133	992	133	127	216	1523	1290	11.8062	4.33188	0.72688	1.87506	2.1271	2.99651	2.99695	2.1271	3.1827	1.07211	supra	humid
190	B	BA	3	3a	Temp_Decid_For_EA	Fukui Prefecture	Japan	35.9169	136.634	439	131	60	204	284	-13	296	227	92	249	20	1776	20	571	356	461	441	65	68	1776	1571	11.3049	1.85141	0.455059	1.30103	2.55267	2.75664	2.66464	2.64542	3.24944	1.05327	meso	humid
191	B	BA	3	3a	Temp_Decid_For_EA	Iwate Prefecture	Japan	38.9981	141.147	74	123	62	207	277	-22	299	222	18	241	12	1443	33	533	202	530	204	78	95	1443	1479	9.75659	2.19917	0.505037	1.51851	2.3075	2.72673	2.72509	2.31175	3.15927	0.989298	meso	humid
192	B	BA	3	3a	Temp_Decid_For_EA	Jiangsu	China	33.2211	119.506	2	150	84	250	306	-31	337	263	23	271	23	1008	74	617	79	555	79	78	58	1008	1807	5.57831	2.04797	0.484011	1.86923	1.90309	2.79029	2.74507	1.90309	3.00346	0.746502	meso	subhumid
193	B	BA	3	3a	Temp_Decid_For_EA	Henan	China	32.8359	114.081	74	158	87	253	312	-32	344	272	28	273	28	964	68	529	66	521	66	72	38	964	1896	5.08439	1.90842	0.463658	1.83251	1.82607	2.72346	2.71767	1.82607	2.98408	0.706239	meso	subhumid
194	B	BA	3	3a	Temp_Decid_For_EA	Shandong	China	36.2072	116.6	77	139	95	256	308	-63	371	262	-6	265	-6	707	107	529	20	521	20	104	136	701	1679	4.1751	1.96604	0.472177	2.02938	1.32222	2.72346	2.71767	1.32222	2.84572	0.620667	meso	subhumid
195	B	BA	3	3a	Temp_Decid_For_EA	North Hamgyong Province	North Korea	41.8728	129.741	20	85	76	189	264	-140	403	229	-64	229	-79	544	91	383	27	383	32	136	410	512	1216	4.21053	1.67249	0.426916	1.95904	1.44716	2.5832	2.58433	1.51851	2.70927	0.624336	supra	subhumid
196	B	BA	3	3a	Temp_Decid_For_EA	Shandong	China	36.4332	119.725	12	132	83	238	295	-52	347	258	-4	258	-4	683	94	475	26	475	26	100	138	675	1599	4.22139	1.84109	0.453484	1.97313	1.43136	2.67669	2.67761	1.43136	2.8293	0.625455	meso	subhumid
197	B	BA	3	3a	Temp_Decid_For_EA	Henan	China	34.4252	113.484	179	148	96	264	312	-50	362	263	11	268	11	647	76	393	30	348	30	92	84	647	1773	3.64918	1.29851	0.361446	1.88081	1.49136	2.59439	2.54283	1.49136	2.8109	0.562196	meso	subhumid
198	B	BA	3	3a	Temp_Decid_For_SAndes	Rio Negro Province	Argentina	-41.683	-71.8014	973	69	66	361	173	-11	184	31	120	123	19	1301	55	637	157	172	583	70	99	1301	829	15.6936	1.39837	0.379917	1.74036	2.19866	2.80414	2.23805	2.76641	3.11428	1.19572	oro	hyperhumid
199	B	BA	3	3a	Temp_Decid_For_SAndes	Los Rios Region	Chile	-40.0719	-71.6894	1031	75	80	380	198	-13	211	20	137	137	20	1810	63	896	150	150	896	91	90	1810	902	20.0665	1.09489	0.321161	1.79934	2.17898	2.95231	2.17898	2.95279	3.25768	1.30247	oro	hyperhumid
200	B	BA	4	4a	Temp_lauroid_forest_N_America	Texas	USA	30.5104	-93.8862	37	202	73	296	318	70	247	135	151	282	114	1465	11	429	310	340	397	0	0	1465	2426	6.03875	1.20567	0.343541	1.04139	2.49276	2.63246	2.53275	2.59988	3.16584	0.780947	infra	humid
201	B	BA	4	4a	Temp_lauroid_forest_N_America	Mississippi	USA	31.2935	-90.302	101	188	89	336	311	46	264	97	210	269	97	1453	16	420	256	354	420	0	0	1453	2261	6.42636	1.31599	0.364736	1.20412	2.40993	2.62325	2.55023	2.62428	3.16227	0.807965	thermo	humid
202	B	BA	4	4a	Temp_lauroid_forest_N_America	Alabama	USA	31.0715	-85.3189	57	188	86	331	305	47	258	266	160	267	99	1327	21	440	220	411	330	0	0	1327	2256	5.88209	1.53933	0.404718	1.32222	2.34439	2.64345	2.6149	2.51983	3.12287	0.769532	thermo	subhumid
203	B	BA	4	4a	Temp_lauroid_forest_N_America	Alabama	USA	33.3683	-85.9539	313	164	89	311	300	15	285	108	185	257	64	1464	23	494	236	338	452	0	0	1464	1969	7.43525	1.31518	0.364584	1.36173	2.37475	2.69373	2.5302	2.6561	3.16554	0.871295	thermo	humid
204	B	BA	4	4a	Temp_lauroid_forest_N_America	Georgia	USA	30.9006	-84.8222	37	190	85	333	306	50	256	267	163	267	102	1315	22	434	208	415	321	0	0	1315	2281	5.76502	1.55431	0.407273	1.34242	2.32015	2.63749	2.61909	2.50786	3.11893	0.7608	thermo	subhumid
205	B	BA	4	4a	Temp_lauroid_forest_N_America	Georgia	USA	32.1424	-82.4506	79	182	87	322	308	38	270	265	152	265	91	1175	23	409	187	409	289	0	0	1175	2179	5.39238	1.5434	0.405414	1.36173	2.27416	2.61172	2.61278	2.4624	3.07004	0.731781	thermo	subhumid
206	B	BA	4	4a	Temp_lauroid_forest_N_America	South Carolina	USA	32.9497	-80.3319	15	186	68	274	301	53	248	268	162	268	99	1275	30	479	199	479	275	0	0	1275	2238	5.69705	1.78731	0.445186	1.47712	2.30103	2.68034	2.68124	2.44091	3.10551	0.75565	thermo	subhumid
207	B	BA	4	4a	Temp_lauroid_forest_N_America	Georgia	USA	30.7334	-83.6307	56	192	82	329	304	55	249	266	167	266	107	1352	25	463	208	452	346	0	0	1352	2299	5.88082	1.69925	0.431243	1.39794	2.32015	2.66558	2.6561	2.54033	3.13098	0.769438	thermo	subhumid
208	B	BA	4	4a	S_America_Pampa	Rio Grande do Sul	Brazil	-31.3906	-53.667	262	175	84	421	272	72	200	116	213	229	116	1312	11	384	275	360	384	0	0	1312	2103	6.23871	1.57205	0.41028	1.04139	2.44091	2.58433	2.55751	2.58546	3.11793	0.795095	meso	humid
209	B	BA	4	4a	S_America_Pampa	Rocha Department	Uruguay	-33.5985	-53.9264	14	174	68	371	264	80	184	117	195	230	117	1146	13	333	233	326	333	0	0	1146	2091	5.48063	1.41739	0.383347	1.11394	2.36922	2.52244	2.51455	2.52375	3.05918	0.738831	meso	subhumid
210	B	BA	4	4a	S_America_Pampa	Buenos Aires Province	Argentina	-35.2576	-59.1357	28	162	89	390	274	46	228	229	101	229	91	1024	27	320	156	320	162	0	0	1024	1941	5.27563	1.39738	0.379737	1.43136	2.1959	2.50515	2.50651	2.21219	3.0103	0.722274	meso	subhumid
211	B	BA	4	4a	S_America_Pampa	Buenos Aires Province	Argentina	-37.4031	-59.5128	222	136	87	388	250	25	225	183	76	203	67	816	34	303	119	266	122	0	0	816	1632	5	1.31034	0.363677	1.53148	2.07918	2.48144	2.42651	2.08991	2.91169	0.69897	supra	subhumid
212	B	BA	4	4a	S_America_Pampa	Santa Fe Province	Argentina	-32.3571	-61.2209	45	179	90	389	290	59	231	222	107	245	107	1038	49	409	92	386	92	0	0	1038	2146	4.83691	1.57551	0.410863	1.6902	1.96848	2.61172	2.58771	1.96848	3.0162	0.684568	meso	subhumid
213	B	BA	4	4a	S_America_S_Chile	Araucania Region	Chile	-38.4742	-73.222	707	90	76	418	193	12	181	57	139	139	47	1395	74	733	83	83	686	0	6	1395	1077	12.9526	0.597122	0.203338	1.86923	1.92428	2.8651	1.92428	2.83696	3.14457	1.11236	supra	hyperhumid
214	B	BA	4	4a	S_America_S_Chile	Los Lagos Region	Chile	-40.8282	-72.9332	123	117	68	391	216	41	175	83	167	167	72	1511	50	664	170	170	649	0	0	1511	1410	10.7163	1.01796	0.304913	1.69897	2.233	2.82217	2.233	2.81291	3.17926	1.03005	supra	humid
215	B	BA	4	4a	S_America_S_Chile	Aysen Province	Chile	-46.4148	-74.357	24	89	38	323	150	33	117	84	118	125	55	2370	16	729	476	477	683	0	0	2370	1071	22.1289	3.816	0.682686	1.20412	2.67852	2.86273	2.67943	2.83506	3.37475	1.34496	supra	hyperhumid
216	B	BA	4	4a	S_America_S_Chile	Aysen Province	Chile	-47.7064	-74.0001	584	54	47	333	124	-16	141	45	95	95	11	1366	15	415	277	277	387	89	138	1366	641	21.3105	2.91579	0.592819	1.17609	2.44404	2.61805	2.44404	2.58883	3.13545	1.32859	oro	hyperhumid
217	B	BA	4	4a	S_America_S_Chile	Hanover Island, Magallanes and Chilean Antarctica	Chile	-50.9322	-74.4981	445	45	27	304	90	0	90	57	74	74	16	2138	6	597	505	505	553	4	141	2138	538	39.7398	6.82432	0.893447	0.778151	2.70415	2.77597	2.70415	2.74351	3.33001	1.59923	oro	hyperhumid
218	B	BA	4	4a	SE_Australia	Tasmania	Australia	-41.4436	147.628	703	94	55	369	176	27	149	55	139	139	52	1044	30	383	145	145	360	0	0	1044	1124	9.28826	1.04317	0.310304	1.47712	2.16435	2.5832	2.16435	2.55751	3.0187	0.967934	supra	humid
219	B	BA	4	4a	SE_Australia	Victoria	Australia	-37.8952	147.166	98	145	65	378	242	70	172	171	97	196	97	714	14	217	145	154	145	0	0	714	1740	4.10345	0.785714	0.251812	1.14613	2.16435	2.33646	2.19033	2.16435	2.8537	0.613149	meso	subhumid
220	B	BA	4	4a	SE_Australia	New South Wales	Australia	-35.9516	149.605	926	111	78	390	215	14	201	124	57	169	51	881	18	268	170	235	171	0	2	881	1326	6.64404	1.39053	0.378495	1.25527	2.233	2.42813	2.37291	2.23553	2.94498	0.822432	supra	humid
221	B	BA	4	4a	SE_Australia	New South Wales	Australia	-31.3113	152.312	278	171	67	385	252	78	174	207	119	219	114	1069	44	430	115	429	136	0	0	1069	2047	5.22228	1.9589	0.471131	1.64345	2.06446	2.63347	2.63347	2.13672	3.02898	0.71786	meso	subhumid
222	B	BA	4	4a	SE_Australia	New South Wales	Australia	-34.0278	150.493	434	148	76	391	245	51	193	204	116	204	88	1010	27	371	166	371	194	0	0	1010	1775	5.69014	1.81863	0.450038	1.43136	2.22272	2.56937	2.57054	2.29003	3.00432	0.755123	meso	subhumid
223	B	BA	4	4a	SE_Australia	New South Wales	Australia	-29.9508	152.709	202	180	80	420	267	77	190	227	153	228	122	1072	45	447	114	431	148	0	0	1072	2159	4.96526	1.89035	0.460951	1.65321	2.0607	2.65031	2.63548	2.17319	3.03019	0.695942	meso	subhumid
224	B	BA	4	4a	NZ	Southland	New Zeland	-46.0597	167.969	70	103	42	348	167	45	122	95	70	140	66	949	13	277	196	225	226	0	0	949	1235	7.68421	1.60714	0.416165	1.11394	2.29447	2.44248	2.35411	2.35603	2.97727	0.885599	supra	humid
225	B	BA	4	4a	NZ	Canterbury	New Zeland	-43.8664	171.498	204	109	57	361	192	33	159	153	73	157	61	817	11	225	173	206	184	0	0	817	1313	6.22239	1.3121	0.364007	1.04139	2.24055	2.35218	2.31597	2.26717	2.91222	0.793957	supra	humid
226	B	BA	4	4a	NZ	Tasman	New Zeland	-40.8972	172.309	770	89	38	307	156	31	125	76	131	131	52	2739	15	816	496	496	737	0	1	2739	1070	25.5981	3.78626	0.679996	1.17609	2.69636	2.91169	2.69636	2.86806	3.43759	1.40821	supra	hyperhumid
227	B	BA	4	4a	NZ	Manawatu-Wanganui	New Zeland	-40.3534	175.786	279	123	55	370	204	55	149	82	169	169	82	1275	16	386	240	240	386	0	0	1275	1478	8.62652	1.42012	0.383837	1.20412	2.38202	2.58659	2.38202	2.58771	3.10551	0.935836	supra	humid
228	B	BA	4	4a	NZ	Manawatu-Wanganui	New Zeland	-38.7208	175.192	271	126	65	389	216	48	167	82	175	175	82	1442	18	448	257	257	448	0	0	1442	1517	9.5056	1.46857	0.392446	1.25527	2.41162	2.65128	2.41162	2.65225	3.15897	0.97798	supra	humid
229	B	BA	4	4a	NZ	Bay of Plenty	New Zeland	-37.5713	175.856	218	138	48	335	214	71	142	98	140	184	98	1534	17	482	303	319	482	0	0	1534	1659	9.24653	1.7337	0.43675	1.23045	2.48287	2.68305	2.50515	2.68395	3.18583	0.965979	supra	humid
230	B	BA	4	4a	Temp_Lauroid_For_EA_CN_JP_KOR	Yunnan	China	28.2691	104.314	1074	145	69	257	276	6	269	235	47	235	47	1124	76	636	60	636	60	0	9	1124	1739	6.46348	2.70638	0.56895	1.88081	1.78533	2.80346	2.80414	1.78533	3.05077	0.810467	meso	humid
231	B	BA	4	4a	Temp_Lauroid_For_EA_CN_JP_KOR	Hunan	China	27.7688	111.277	197	176	68	219	323	14	309	249	96	286	60	1397	52	672	141	418	153	0	0	1397	2117	6.59896	1.46154	0.391207	1.716	2.15229	2.82737	2.62221	2.18752	3.1452	0.819476	thermo	humid
232	B	BA	4	4a	Temp_Lauroid_For_EA_CN_JP_KOR	Jiangxi	China	26.3452	114.819	281	188	69	232	326	29	297	256	108	287	77	1612	50	749	148	444	169	0	0	1612	2253	7.1549	1.54704	0.406035	1.69897	2.17319	2.87448	2.64836	2.23045	3.20737	0.854604	thermo	humid
233	B	BA	4	4a	Temp_Lauroid_For_EA_CN_JP_KOR	Fujian	China	27.2849	119.338	813	161	71	255	296	19	277	217	94	253	66	1982	47	860	183	562	215	0	0	1982	1926	10.2908	2.22134	0.508037	1.6721	2.26482	2.9345	2.75051	2.33445	3.2971	1.01245	meso	humid
234	B	BA	4	4a	Temp_Lauroid_For_EA_CN_JP_KOR	Hanan	China	26.9928	110.174	1057	141	67	234	274	-11	285	171	67	240	35	1809	43	783	212	520	223	44	24	1809	1695	10.6726	2.16667	0.500602	1.63347	2.32838	2.89376	2.71684	2.35025	3.25744	1.02827	meso	humid
235	B	BA	4	4a	Temp_Lauroid_For_EA_CN_JP_KOR	South Jeolla Province	South Korea	34.6667	126.651	306	128	44	161	264	-11	275	242	21	242	21	1615	71	864	102	864	102	49	74	1615	1538	10.5007	3.57025	0.65994	1.85126	2.01284	2.93651	2.93702	2.01284	3.20817	1.02122	meso	humid
236	B	BA	4	4a	Temp_Lauroid_For_EA_CN_JP_KOR	Kagoshima Prefecture	Japan	31.6531	130.445	131	183	39	172	291	66	225	257	127	273	96	2244	62	1157	212	804	265	0	0	2244	2191	10.2419	2.94505	0.596053	1.79239	2.32838	3.06333	2.9058	2.42488	3.35102	1.01038	thermo	humid
237	B	BA	4	4a	Temp_Lauroid_For_EA_CN_JP_KOR	Jeju province	South Korea	33.4376	126.79	282	145	19	82	258	32	226	247	87	247	51	2014	54	946	214	946	266	0	4	2014	1739	11.5814	3.82996	0.683943	1.73239	2.33244	2.97589	2.97635	2.42651	3.30406	1.06376	meso	humid
238	B	BA	4	4b	Coastal_NW_America	California	USA	38.6076	-123.019	497	124	85	426	236	35	200	71	173	177	71	1416	94	917	11	13	917	0	0	1416	1492	9.49062	0.0734463	0.0307803	1.97313	1.07918	2.96237	1.14613	2.96284	3.15106	0.977294	meso	humid
239	B	BA	4	4b	Coastal_NW_America	California	USA	39.0029	-123.63	290	125	56	406	203	64	139	88	160	166	88	1206	86	679	14	25	679	0	0	1206	1506	8.00797	0.150602	0.0609253	1.9345	1.17609	2.83187	1.41497	2.83251	3.08135	0.903522	meso	humid
240	B	BA	4	4b	Coastal_NW_America	California	USA	39.8099	-123.778	455	124	83	410	242	38	204	71	177	184	71	1688	80	907	20	35	907	0	0	1688	1487	11.3517	0.190217	0.0756263	1.90309	1.32222	2.95761	1.5563	2.95809	3.22737	1.05506	meso	humid
241	B	BA	4	4b	Coastal_NW_America	California	USA	41.6045	-123.97	308	122	76	399	234	43	191	72	182	182	72	1882	84	1057	34	34	1057	0	0	1882	1458	12.9081	0.186813	0.0743824	1.92428	1.54407	3.02407	1.54407	3.02449	3.27462	1.11086	meso	hyperhumid
242	B	BA	4	4b	Coastal_NW_America	Oregon	USA	43.4767	-123.915	353	108	76	410	216	30	186	66	165	165	59	1620	69	794	49	49	772	0	0	1620	1292	12.5387	0.29697	0.11293	1.83885	1.69897	2.89982	1.69897	2.88818	3.20952	1.09825	supra	hyperhumid
243	B	BA	4	4b	Coastal_NW_America	Washington	USA	47.1339	-123.537	118	111	76	386	231	34	196	64	174	174	57	2287	63	1088	135	135	1085	0	0	2287	1328	17.2214	0.775862	0.249409	1.79934	2.13354	3.03663	2.13354	3.03583	3.35927	1.23607	supra	hyperhumid
244	B	BA	4	4b	Coastal_NW_America	British Columbia	Canada	50.4567	-127.23	622	62	53	316	161	-8	168	18	114	124	12	2575	59	1170	174	187	1091	102	150	2575	750	34.3333	1.50806	0.399339	1.77085	2.24304	3.06819	2.27416	3.03822	3.41078	1.53572	oro	hyperhumid
245	B	BA	4	4b	Coastal_NW_America	Alaska	USA	55.1123	-131.007	97	73	42	231	172	-11	183	93	137	144	8	3030	35	1265	458	610	817	81	151	3030	869	34.8677	4.23611	0.719009	1.54407	2.66181	3.10209	2.78604	2.91275	3.48144	1.54242	supra	hyperhumid
246	B	BA	4	4b	Coastal_NW_America	Alaska	USA	55.4891	-132.768	358	55	46	264	153	-22	175	35	115	123	-2	2665	43	1099	306	381	861	131	220	2402	669	35.9043	3.09756	0.612525	1.63347	2.48714	3.041	2.58206	2.93551	3.38057	1.55515	oro	hyperhumid
247	B	BA	4	4b	Coastal_NW_America	Alaska	USA	57.6021	-134.285	93	57	46	220	168	-41	209	79	113	140	-19	1660	36	711	254	374	432	144	278	1248	734	17.0027	2.67143	0.564835	1.5563	2.40654	2.85187	2.57403	2.63649	3.09621	1.23052	oro	hyperhumid
248	B	BA	4	4c	Afromontane	Oromia State	Ethiopia	8.1994	36.1844	2284	151	75	620	216	96	120	140	149	166	140	2023	73	1019	83	318	1019	0	0	2023	1814	11.1521	1.91566	0.464737	1.86332	1.92428	3.00817	2.50379	3.0086	3.306	1.04736	meso	humid
249	B	BA	4	4c	Afromontane	Oromia State	Ethiopia	6.1994	38.8429	2262	160	80	552	243	97	146	161	164	180	147	1788	56	773	85	261	537	0	0	1788	1915	9.33681	1.45	0.389166	1.74819	1.9345	2.88818	2.4183	2.73078	3.25237	0.970199	meso	humid
250	B	BA	4	4c	Afromontane	Western Region	Uganda	0.2047	29.9301	2753	109	72	810	156	67	88	106	107	112	104	1467	34	513	209	447	490	0	0	1467	1305	11.2414	3.99107	0.698194	1.53148	2.32222	2.71012	2.65128	2.69108	3.16643	1.05082	supra	humid
251	B	BA	4	4c	Afromontane	Nyeri County	Kenya	-0.209	37.2423	3458	93	97	727	162	29	133	100	97	103	82	1274	58	671	130	528	243	0	0	1274	1121	11.3649	5.12621	0.787192	1.76343	2.11727	2.82672	2.72346	2.38739	3.10517	1.05556	supra	humid
252	B	BA	4	4c	Afromontane	Eastern Cape	South Africa	-30.9879	28.1403	1519	138	114	488	240	7	233	187	74	187	74	637	65	315	34	315	34	0	0	637	1659	3.83966	1.68449	0.428862	1.81291	1.54407	2.49831	2.49969	1.54407	2.80414	0.584293	supra	subhumid
253	B	BA	4	4c	TrAmerMts	Puntarenas Province	Costa Rica	10.3224	-84.7938	1764	164	38	579	204	139	65	158	170	174	158	3397	55	1489	209	238	1105	0	0	3397	1966	17.2787	1.36782	0.374348	1.74036	2.32222	3.17289	2.3784	3.04376	3.5311	1.23751	meso	hyperhumid
254	B	BA	4	4c	TrAmerMts	Bolivar	Venezuela	5.31885	-62.275	2281	146	68	729	195	102	94	139	145	152	139	2951	48	1206	240	493	1206	0	0	2951	1751	16.8532	3.24342	0.627716	1.68124	2.38202	3.08135	2.69373	3.08171	3.46997	1.22668	meso	hyperhumid
255	B	BA	4	4c	TrAmerMts	Valle del Cauca	Colombia	3.5302	-76.1424	2053	166	53	740	203	131	71	165	167	169	164	1606	37	633	185	296	471	0	0	1606	1997	8.04206	1.75148	0.439566	1.5682	2.26951	2.8014	2.47276	2.67394	3.20575	0.905367	meso	humid
256	B	BA	4	4c	TrAmerMts	Cusco Department	Peru	-12.7393	-72.8793	2076	161	61	622	199	101	99	168	145	169	145	1995	58	932	142	678	142	0	0	1995	1931	10.3314	4.01183	0.699997	1.76343	2.15534	2.96942	2.83187	2.15534	3.29994	1.01416	meso	humid
257	B	BA	4	4c	TrAmerMts	Cochabamba Departmetn	Bolivia	-17.4021	-65.1708	1313	199	63	528	248	128	120	213	169	216	169	1816	63	893	134	676	134	0	0	1816	2388	7.60469	3.12963	0.615911	1.79934	2.13033	2.95085	2.83059	2.13033	3.25912	0.881082	thermo	humid
258	B	BA	4	4c	TrAsianMts	Western Development Region	Nepal	28.3801	83.996	2234	108	88	338	206	-55	262	183	47	183	20	2869	101	1996	65	1996	86	116	76	2869	1301	22.0523	10.9071	1.07581	2.00432	1.81954	3.30016	3.30038	1.93952	3.45773	1.34345	supra	hyperhumid
259	B	BA	4	4c	TrAsianMts	Tamil Nadu	India	11.4193	76.6588	2189	156	70	497	230	90	140	151	154	177	145	1492	69	756	41	186	85	0	0	1492	1878	7.94462	1.05085	0.311933	1.83885	1.62325	2.87852	2.27184	1.9345	3.17377	0.900073	meso	humid
260	B	BA	4	4c	TrAsianMts	Central Province	Sri Lanka	6.84255	80.8185	1920	160	53	600	203	114	89	154	160	169	149	2221	32	899	366	544	542	0	0	2221	1921	11.5617	3.21893	0.625203	1.50515	2.56467	2.95376	2.7364	2.7348	3.34655	1.06302	meso	humid
261	B	BA	4	4c	TrAsianMts	East Java	Indonesia	-7.62981	111.218	1986	157	65	654	210	111	99	154	161	165	152	2552	53	996	156	389	913	0	0	2552	1889	13.5098	2.35758	0.526026	1.72428	2.1959	2.99826	2.59106	2.96095	3.40688	1.13065	meso	hyperhumid
262	B	BA	4	4c	TrAsianMts	Papua	Indonesia	-4.1498	139.309	2134	156	51	774	190	124	65	159	151	159	151	2032	18	667	409	455	409	0	0	2032	1873	10.8489	2.86164	0.586771	1.25527	2.61278	2.82413	2.65896	2.61278	3.30792	1.03539	meso	humid
263	B	BA	4	4c	Macaronesia	Azores	Portugal	38.5003	-28.3452	618	142	13	136	195	101	94	145	170	186	111	1021	30	366	135	165	276	0	0	1021	1708	5.97775	0.887097	0.275794	1.47712	2.13354	2.56348	2.22011	2.44248	3.00903	0.776538	meso	subhumid
264	B	BA	4	4c	Macaronesia	Madeira	Portugal	32.7599	-17.045	991	134	10	135	175	98	78	142	167	169	105	2570	58	1088	99	347	998	0	0	2570	1611	15.9528	2.05325	0.484763	1.76343	2	3.03663	2.54158	2.99957	3.40993	1.20284	meso	hyperhumid
265	B	BA	4	4c	Macaronesia	Canary Islands	Spain	28.1239	-17.246	1284	132	9	136	165	98	67	124	150	161	104	392	81	208	4	22	164	0	0	392	1582	2.47788	0.136646	0.0556252	1.90849	0.69897	2.31806	1.36173	2.21748	2.59329	0.39408	meso	dry
266	B	BA	4	4c	TrAmerMts	Chihuahua	Mexico	29.5278	-108.159	2133	129	128	428	282	-17	299	193	152	202	51	599	85	397	32	347	107	87	0	599	1551	3.86202	1.71782	0.434221	1.92942	1.51851	2.59879	2.54158	2.03342	2.77743	0.586815	meso	subhumid
267	B	BA	4	4c	TrAmerMts_Mexico	Chihuahua	Mexico	28.8637	-108.159	1861	147	126	433	295	5	290	206	132	214	72	637	103	485	25	383	101	0	0	637	1759	3.62138	1.78972	0.445561	2.01284	1.41497	2.68574	2.58433	2.0086	2.80414	0.558874	meso	subhumid
268	B	BA	4	4c	TrAmerMts_Mexico	Chihuahua	Mexico	27.5035	-107.539	2246	132	123	452	267	-4	271	184	153	190	64	752	73	435	43	376	164	45	0	752	1583	4.75047	1.97895	0.474063	1.86332	1.64345	2.63849	2.57634	2.21748	2.87622	0.676737	meso	subhumid
269	B	BA	4	4c	TrAmerMts_Mexico	Chihuahua	Mexico	26.8797	-107.028	2424	126	127	470	258	-12	270	174	149	180	60	764	88	507	42	452	129	73	0	764	1506	5.07304	2.51111	0.545445	1.94448	1.63347	2.70501	2.6561	2.11394	2.88309	0.705268	meso	subhumid
270	B	BA	4	4c	TrAmerMts_Mexico	Durango	Mexico	23.6479	-105.772	1991	143	108	518	235	26	209	180	131	181	95	1337	89	864	60	754	210	0	0	1337	1715	7.79592	4.16575	0.713133	1.94939	1.78533	2.93651	2.87795	2.32428	3.12613	0.891867	meso	humid
271	B	BA	4	4c	TrAmerMts_Mexico	Jalisco	Mexico	20.6159	-104.755	1902	157	97	535	241	59	181	178	152	180	125	1085	110	726	14	449	61	0	0	1085	1886	5.75292	2.49444	0.543378	2.04139	1.17609	2.86094	2.65321	1.79239	3.03543	0.759888	meso	subhumid
272	B	BA	4	4c	TrAmerMts_Mexico	Nuevo Leon	Mexico	25.2879	-100.19	1365	182	110	454	291	48	242	219	155	234	115	749	77	469	54	288	63	0	0	749	2181	3.4342	1.23077	0.348455	1.88649	1.74036	2.67117	2.4609	1.80618	2.87448	0.535826	thermo	dry
273	B	BA	4	4c	TrAmerMts_Mexico	Tamaulipas	Mexico	23.0721	-99.5731	1497	176	96	480	263	63	199	211	132	213	122	932	78	494	49	401	68	0	0	932	2109	4.41916	1.88263	0.459789	1.89209	1.69897	2.69373	2.60423	1.83885	2.96942	0.645339	thermo	subhumid
274	B	BA	4	4c	TrAsianMts	Yunnan	China	27.2752	100.083	3523	68	82	361	165	-61	226	133	-5	133	-5	1143	101	787	17	787	17	157	190	1132	827	13.688	5.91729	0.839936	2.00432	1.25527	2.89597	2.89653	1.25527	3.05385	1.13634	oro	hyperhumid
275	B	BA	4	4c	TrAsianMts	Southern Highlands Province	Papua New Guinea	-6.07567	143.979	2853	115	46	765	146	86	60	113	111	118	109	3423	17	1008	608	881	719	0	0	3423	1381	24.7864	7.4661	0.927683	1.23045	2.78462	3.00346	2.94547	2.85733	3.53441	1.39421	supra	hyperhumid
276	B	BA	4	4c	TrAmerMts	State of Mexico	Mexico	19.546	-99.9324	2916	126	106	563	217	29	188	135	101	151	96	872	85	504	43	180	57	0	0	872	1513	5.76338	1.19205	0.340851	1.92942	1.64345	2.70243	2.25768	1.76343	2.94052	0.760678	supra	subhumid
277	B	BA	4	4c	TrAmerMts	Trujillo	Venezuela	9.01248	-70.6433	3006	104	63	707	146	57	89	108	101	108	99	993	45	350	76	265	79	0	0	993	1247	7.96311	2.4537	0.538285	1.65321	1.88649	2.54407	2.42488	1.90309	2.99695	0.901083	supra	humid
278	B	BA	4	4c	TrAmerMts	Alto	Bolivia	-15.5655	-68.4891	2648	134	74	570	187	56	131	149	108	150	108	1272	72	670	44	493	44	0	0	1272	1610	7.90062	3.28667	0.63212	1.85733	1.65321	2.82607	2.69373	1.65321	3.10449	0.897661	supra	humid
279	B	BA	4	4c	Afromontane	Molale	Ethiopia	10.133	39.6669	3049	130	97	590	209	44	165	135	110	153	107	1162	113	1005	32	161	54	0	0	1162	1564	7.42967	1.05229	0.312238	2.05308	1.51851	3.00217	2.20952	1.74036	3.06521	0.870969	supra	humid
280	B	BB	5	5a	Mediterranean_WNA	California	USA	37.5436	-121.114	15	171	122	443	325	50	275	113	236	241	101	311	83	164	4	5	163	0	0	311	2055	1.51338	0.0207469	0.00891806	1.91908	0.69897	2.21484	0.778151	2.21484	2.49276	0.179949	thermo	subarid
281	B	BB	5	5a	Mediterranean_WNA	California	USA	38.3482	-122.451	344	139	101	437	267	36	231	77	197	197	77	877	91	530	7	7	530	0	0	877	1666	5.26411	0.035533	0.0151639	1.95904	0.90309	2.72428	0.90309	2.72509	2.943	0.721325	meso	subhumid
282	B	BB	5	5a	Mediterranean_WNA	California	USA	36.6519	-121.483	345	140	106	474	261	38	223	95	186	191	85	416	93	247	4	5	246	0	0	416	1675	2.48358	0.026178	0.0112227	1.96848	0.69897	2.3927	0.778151	2.3927	2.61909	0.395079	meso	dry
283	B	BB	5	5a	Mediterranean_WNA	California	USA	34.3947	-119.055	392	171	105	435	304	62	242	116	231	240	111	401	97	267	3	3	225	0	0	401	2048	1.95801	0.0125	0.00539503	1.98677	0.60206	2.42651	0.60206	2.35411	2.60314	0.291814	thermo	subarid
284	B	BB	5	5a	Mediterranean_WNA	Baja California	Mexico	32.1124	-116.612	467	170	104	455	296	67	229	130	219	234	117	292	88	167	6	10	150	0	0	292	2035	1.43489	0.042735	0.018174	1.94448	0.845098	2.22272	1.04139	2.17898	2.46538	0.156818	thermo	subarid
285	B	BB	5	5a	Mediterranean_Chile	Santiago Metropolitan Region	Chile	-33.6447	-71.3219	125	165	97	420	284	52	232	102	228	228	102	378	110	295	1	1	295	0	0	378	1980	1.90909	0.00438596	0.00190064	2.04139	0.30103	2.46982	0.30103	2.47129	2.57749	0.280827	meso	subarid
286	B	BB	5	5a	Mediterranean_Chile	Bio Bio Region	Chile	-36.7944	-72.8278	107	138	79	412	246	55	191	91	192	192	91	1009	79	578	48	48	578	0	0	1009	1659	6.08198	0.25	0.09691	1.89763	1.6902	2.76193	1.6902	2.76268	3.00389	0.784045	supra	humid
287	B	BB	5	5a	Mediterranean_Safr	Western Cape	South Africa	-33.9699	18.4369	312	154	45	366	217	94	123	130	188	191	119	879	51	372	95	97	365	0	0	879	1850	4.75135	0.507853	0.178359	1.70757	1.98227	2.57054	1.99123	2.56348	2.94399	0.676817	meso	subhumid
288	B	BB	5	5a	Mediterranean_Safr	Western Cape	South Africa	-32.8568	18.6984	315	169	106	459	287	56	231	114	220	225	112	372	50	155	36	40	151	0	0	372	2026	1.83613	0.177778	0.0710634	1.69897	1.5682	2.19033	1.61278	2.18184	2.57054	0.263903	meso	subarid
289	B	BB	5	5a	Mediterranean_SS	Tanger-Tetouan-Al Hoceima	Morocco	35.0574	-5.748	177	181	80	368	301	83	218	140	248	248	124	820	77	447	5	5	422	0	0	820	2170	3.7788	0.0201613	0.00866884	1.88649	0.778151	2.65031	0.778151	2.62634	2.91381	0.577354	thermo	subhumid
290	B	BB	5	5a	Mediterranean_SS	Casablanca-Settat	Morocco	33.3688	-6.9423	430	175	90	393	297	67	229	117	241	241	117	436	76	217	3	3	217	0	0	436	2105	2.07126	0.0124481	0.00537278	1.88081	0.60206	2.33646	0.60206	2.33846	2.63949	0.316234	thermo	dry
291	B	BB	5	5a	Mediterranean_SS	Relizane Province	Algeria	35.941	1.1773	674	158	93	336	314	36	278	100	254	254	82	415	58	170	12	12	165	0	0	415	1898	2.18651	0.0472441	0.0200479	1.76343	1.11394	2.23045	1.11394	2.22011	2.61805	0.339752	meso	dry
292	B	BB	5	5a	Mediterranean_SS	Beja Governorate	Tunisia	36.728	9.1549	427	165	88	346	310	55	255	97	250	250	94	756	59	327	25	25	289	0	0	756	1983	3.81241	0.1	0.0413927	1.77085	1.41497	2.51455	1.41497	2.4624	2.87852	0.581199	thermo	subhumid
293	B	BB	5	5a	Mediterranean_SS	Andalusia	Spain	38.0193	-5.359	422	167	102	339	335	33	302	99	264	264	83	485	55	209	12	12	192	0	0	485	1999	2.42621	0.0454545	0.0193052	1.74036	1.11394	2.32015	1.11394	2.28556	2.68574	0.384929	thermo	dry
294	B	BB	5	5a	Mediterranean_SS	Valencian Community	Spain	39.7645	-0.468	496	150	72	306	280	44	236	175	226	235	81	496	44	229	53	57	109	0	0	496	1806	2.7464	0.242553	0.094315	1.64345	1.73239	2.35984	1.76343	2.04139	2.69548	0.438764	meso	dry
295	B	BB	5	5a	Mediterranean_SS	Portalegre District	Portugal	39.1468	-8.2326	144	166	91	377	300	58	242	115	238	238	101	661	58	289	17	17	279	0	0	661	1987	3.32662	0.0714286	0.0299632	1.76343	1.25527	2.4609	1.25527	2.44716	2.8202	0.522004	thermo	dry
296	B	BB	5	5a	Mediterranean_SS	Catalonia	Spain	41.7139	2.51703	145	157	60	264	279	54	225	185	233	243	86	662	21	226	113	132	153	0	0	662	1889	3.5045	0.54321	0.188425	1.32222	2.0569	2.35411	2.12385	2.18752	2.82086	0.544626	thermo	dry
297	B	BB	5	5a	Mediterranean_SS	Provence-Alpes-Cote dAzur	France	43.2895	6.11682	216	148	54	249	266	48	219	128	224	233	77	661	46	282	53	62	175	0	0	661	1775	3.72394	0.266094	0.102466	1.66276	1.73239	2.45025	1.79934	2.24551	2.8202	0.571003	meso	subhumid
298	B	BB	5	5a	Mediterranean_SS	Sardinia	Italy	39.4282	9.4506	472	151	33	185	252	72	181	112	216	229	88	559	52	234	26	36	190	0	0	559	1817	3.0765	0.157205	0.0634104	1.716	1.43136	2.36922	1.5682	2.28103	2.74741	0.488057	meso	dry
299	B	BB	5	5a	Mediterranean_SS	Puglia	Italy	40.4917	17.8756	71	172	23	128	269	88	181	160	244	255	101	611	45	249	56	70	185	0	0	611	2059	2.96746	0.27451	0.105343	1.65321	1.75587	2.3962	1.85126	2.26951	2.78604	0.472385	thermo	dry
300	B	BB	5	5a	Mediterranean_SS	Sicily	Italy	37.5981	13.348	647	143	53	259	254	49	205	102	209	221	77	520	59	228	19	32	173	0	0	520	1720	3.02326	0.144796	0.0587282	1.77085	1.30103	2.35793	1.51851	2.24055	2.716	0.480475	meso	dry
301	B	BB	5	5a	Mediterranean_SS	Attica	Greece	38.0568	23.8707	467	148	32	166	251	57	194	99	232	232	74	435	68	220	15	15	167	0	0	435	1774	2.45209	0.0646552	0.027209	1.83251	1.20412	2.34242	1.20412	2.22531	2.63849	0.389536	meso	dry
302	B	BB	5	5a	Mediterranean_SS	Izmir Province	Turkey	38.0249	27.3263	155	173	72	274	318	54	264	90	272	272	87	697	94	468	6	6	347	0	0	697	2073	3.36228	0.0220588	0.00947589	1.97313	0.845098	2.67025	0.845098	2.54158	2.84323	0.526633	thermo	dry
303	B	BB	5	5a	Mediterranean_SS	Latakia Governorate	Syria	35.5924	36.0447	381	178	84	319	314	50	265	91	265	265	91	858	73	437	14	14	437	0	0	858	2134	4.02062	0.0528302	0.0223583	1.86332	1.17609	2.64048	1.17609	2.64147	2.93349	0.604293	thermo	subhumid
304	B	BB	5	5a	Mediterranean_SS	Haifa District	Israel	32.466	35.0082	44	204	70	328	310	98	212	135	262	271	134	566	115	446	0	0	337	0	0	566	2450	2.3102	0	0	2.0607	0	2.64933	0	2.52892	2.75282	0.36365	infra	dry
305	B	BB	5	5a	Mediterranean_SWAustr	Western Australia	Australia	-32.4909	116.598	369	163	93	407	292	64	228	106	220	227	106	603	81	365	32	43	365	0	0	603	1951	3.09072	0.189427	0.0753379	1.90849	1.51851	2.56229	1.64345	2.56348	2.78032	0.49006	meso	dry
306	B	BB	5	5a	Mediterranean_SWAustr	Western Australia	Australia	-34.2736	117.691	245	150	84	443	256	67	188	106	192	198	106	446	56	210	42	44	186	0	0	446	1801	2.4764	0.222222	0.0871502	1.74819	1.63347	2.32222	1.65321	2.27184	2.64933	0.393821	meso	dry
307	B	BB	5	5a	Mediterranean_SWAustr	South Australia	Australia	-34.0404	135.764	77	165	65	395	254	90	164	119	211	211	119	419	58	202	36	36	202	0	0	419	1981	2.11509	0.170616	0.0684145	1.76343	1.5682	2.30535	1.5682	2.3075	2.62221	0.32533	meso	dry
308	B	BB	5	5b	Juniper woodl-EurA_MidEast	Mazandaran Province	Iran	35.9795	53.471	2102	88	103	304	263	-75	339	9	192	199	-21	332	24	107	56	60	83	142	233	246	1110	2.21622	0.301508	0.114447	1.38021	1.75587	2.02938	1.78533	1.92428	2.39094	0.345612	supra	dry
309	B	BB	5	5b	Juniper woodl-EurA_MidEast	Qashqadaryo Region	Uzbekistan	38.9588	67.3024	1845	82	105	315	257	-76	333	68	187	187	-26	470	66	237	18	18	153	151	251	315	1041	3.02594	0.0962567	0.0399123	1.81954	1.27875	2.37475	1.27875	2.18752	2.49831	0.48086	supra	dry
310	B	BB	5	5b	Juniper woodl-EurA_MidEast	Vahdat District	Tajikistan	38.8226	69.5988	2331	59	93	295	219	-97	316	47	132	160	-49	687	68	366	20	31	184	168	357	491	835	5.88024	0.19375	0.0769134	1.83251	1.32222	2.56348	1.50515	2.26717	2.69108	0.769395	supra	subhumid
311	B	BB	5	5b	Juniper woodl-EurA_MidEast	North Khorasan Province	Iran	38.0688	57.3601	1594	94	115	308	291	-82	373	71	179	216	-25	359	60	170	17	24	119	150	247	239	1190	2.0084	0.111111	0.0457575	1.77815	1.25527	2.23045	1.39794	2.07918	2.3784	0.302851	supra	dry
312	B	BB	5	5b	Juniper woodl-EurA_Nafr	Ifrane	Morocco	33.2307	-4.9326	2165	97	114	371	268	-41	309	36	192	192	18	719	48	263	34	34	251	129	81	719	1168	6.15582	0.177083	0.0708072	1.68124	1.54407	2.41996	1.54407	2.4014	2.85673	0.789286	supra	humid
313	B	BB	5	5b	Juniper woodl-EurA_Nafr	Khenifra Province	Morocco	32.5097	-4.99264	2087	119	116	355	297	-31	327	92	221	221	31	374	39	145	28	28	107	95	40	374	1429	2.61721	0.126697	0.0518071	1.59106	1.4624	2.16137	1.4624	2.03342	2.57287	0.417839	meso	dry
314	B	BB	5	5b	Juniper woodl-EurA_Nafr	Fez-Meknes	Morocco	33.2471	-4.8563	2323	88	115	372	258	-50	308	27	182	182	9	739	48	264	34	34	255	150	115	739	1054	7.01139	0.186813	0.0743824	1.68124	1.54407	2.4216	1.54407	2.40824	2.86864	0.845804	supra	humid
315	B	BB	5	5b	Juniper woodl-EurA_Nafr	Fez-Meknes	Morocco	33.437	-4.6175	1959	109	115	369	282	-29	311	36	206	206	29	603	49	222	26	26	208	101	47	603	1313	4.59254	0.126214	0.0516208	1.6902	1.43136	2.34635	1.43136	2.32015	2.78032	0.662053	supra	subhumid
316	B	BB	5	5b	Juniper woodl-EurA_Nafr	Batna Province	Algeria	35.2092	6.5563	1424	126	107	328	308	-17	325	136	227	234	33	293	30	91	31	52	73	80	39	293	1514	1.93527	0.222222	0.0871502	1.47712	1.50515	1.95904	1.72428	1.86923	2.46687	0.286742	meso	subarid
317	B	BB	5	5b	Juniper woodl-EurA_Ib	Aragon	Spain	40.1608	-1.0556	1229	107	94	340	265	-13	277	109	200	200	31	470	31	164	75	75	95	80	48	470	1283	3.66329	0.375	0.138303	1.49136	1.88081	2.21484	1.88081	1.98227	2.6721	0.563871	supra	subhumid
318	B	BB	5	5b	Juniper woodl-EurA_Ib	Castile and Leon	Spain	41.769	-3.062	1064	104	94	351	258	-8	266	44	193	193	30	592	27	191	71	71	177	70	49	592	1253	4.72466	0.367876	0.136047	1.43136	1.85733	2.28103	1.85733	2.25042	2.77232	0.674371	supra	subhumid
319	B	BB	5	5b	Juniper woodl-EurA_Tk	Sivas Province	Turkey	39.098	36.1399	1453	92	99	298	271	-62	333	116	204	204	-19	470	43	183	35	35	118	131	216	336	1150	2.92174	0.171569	0.0687677	1.63347	1.5563	2.26245	1.5563	2.07555	2.52634	0.465641	supra	dry
320	B	BB	5	5b	Juniper woodl-NA	Arizona	USA	34.0692	-109.934	2159	107	122	369	280	-51	331	205	178	208	8	629	45	287	56	189	165	137	108	629	1287	4.88733	0.908654	0.280727	1.65321	1.75587	2.45788	2.27875	2.22011	2.79865	0.689072	supra	subhumid
321	B	BB	5	5b	Juniper woodl-NA	New Mexico	USA	36.4552	-106.011	2243	82	126	338	271	-102	372	193	-13	193	-32	349	49	182	56	133	60	172	273	291	1053	2.76353	0.689119	0.22766	1.6902	1.75587	2.26007	2.1271	1.78533	2.46389	0.441465	supra	dry
322	B	BB	5	5b	Juniper woodl-NA	New Mexico	USA	35.8171	-106.355	2273	89	122	337	274	-88	362	199	-10	200	-25	334	60	193	45	140	52	161	236	285	1120	2.54464	0.7	0.230449	1.77815	1.66276	2.28556	2.14922	1.72428	2.45484	0.405627	supra	dry
323	B	BB	5	5b	Juniper woodl-NA	Nevada	USA	39.1744	-114.158	2158	84	113	297	294	-89	382	177	-38	217	-38	280	21	91	48	87	48	166	298	229	1096	2.08942	0.400922	0.146414	1.32222	1.6902	1.95904	1.94448	1.6902	2.35984	0.320025	supra	dry
324	B	BB	5	5b	Juniper woodl-NA	Utah	USA	39.1214	-111.572	2464	54	117	306	263	-119	383	73	177	183	-66	359	13	103	73	85	83	201	450	214	838	2.5537	0.464481	0.165684	1.11394	1.86923	2.01284	1.9345	1.92428	2.33041	0.40717	supra	dry
325	B	BB	5	5b	Juniper woodl-NA	Nevada	USA	38.1992	-114.812	1634	125	116	304	332	-48	380	55	204	255	3	274	24	92	44	85	67	114	119	274	1494	1.834	0.333333	0.124939	1.38021	1.65321	1.96379	1.9345	1.83251	2.43775	0.2634	meso	subarid
326	B	BB	5	5b	Juniper woodl-NA	Utah	USA	38.294	-113.541	2177	85	114	305	290	-84	373	214	-33	214	-33	210	24	70	38	70	38	167	284	171	1100	1.55455	0.327103	0.122905	1.38021	1.59106	1.8451	1.85126	1.59106	2.233	0.191603	supra	subarid
327	B	BB	5	5b	Juniper woodl-EurA_Tk	Konya Province	Turkey	38.7395	33.0179	922	131	103	300	315	-27	342	156	250	250	19	326	45	133	22	22	109	90	81	326	1574	2.07116	0.088	0.0366289	1.65321	1.36173	2.12385	1.36173	2.04139	2.51322	0.316213	meso	dry
328	B	BB	5	5b	Juniper woodl-EurA_Tk	Siirt Province	Turkey	37.8101	42.1689	764	163	114	284	381	-21	402	71	303	303	32	589	71	263	4	4	238	68	37	589	1954	3.01433	0.0132013	0.00569575	1.85126	0.69897	2.41996	0.69897	2.3784	2.77012	0.479191	thermo	dry
329	B	BB	5	5b	Juniper woodl-EurA_MidEast	Chaharmahal and Bakhtiari Province	Iran	31.4771	50.56	1873	142	124	316	346	-47	393	17	238	266	17	689	99	419	1	3	419	99	84	689	1706	4.03869	0.0112782	0.00487064	1.99564	0.30103	2.62221	0.60206	2.62325	2.83822	0.60624	meso	subhumid
330	B	BB	5	5b	Juniper woodl-EurA_MidEast	Fars Province	Iran	29.711	52.3432	2513	118	134	362	314	-56	370	6	200	229	6	713	106	477	2	5	477	129	113	713	1418	5.02821	0.0218341	0.00938038	2.02531	0.477121	2.67852	0.778151	2.67943	2.85309	0.701413	supra	subhumid
331	B	BB	5	5b	Juniper woodl-EurA_MidEast	Kermanshah Province	Iran	34.0267	46.587	1325	158	131	324	376	-29	405	70	257	289	31	426	88	223	0	1	220	79	39	426	1898	2.24447	0.00346021	0.00150016	1.94448	0	2.3483	0.30103	2.34439	2.62941	0.351113	meso	dry
332	B	BB	5	5b	Juniper woodl-EurA_Tk	Kahramanmaras Province	Turkey	37.9157	36.3572	1791	83	109	312	275	-73	348	2	204	204	-27	732	57	312	25	25	265	152	269	435	1072	4.05784	0.122549	0.0502053	1.75587	1.41497	2.49415	1.41497	2.42488	2.63849	0.608294	supra	subhumid
333	B	BB	5	5b	Juniper woodl-EurA_Tk	Tunceli Province	Turkey	39.2118	39.5338	1719	87	96	260	281	-88	369	-38	221	221	-38	849	66	374	12	12	316	145	307	500	1142	4.37828	0.0542986	0.0229636	1.81954	1.11394	2.57287	1.11394	2.50106	2.69897	0.641304	supra	subhumid
334	B	BB	5	5c	T_Aridiest_Patagonia	Mendoza Province	Argentina	-34.5493	-68.2133	607	157	100	381	284	21	263	233	76	233	76	315	51	141	33	141	33	0	0	315	1887	1.66932	0.60515	0.205516	1.70757	1.53148	2.14922	2.15229	1.53148	2.49831	0.222539	meso	subarid
335	B	BB	5	5c	T_Aridiest_Patagonia	Neuquen Province	Argentina	-37.942	-69.3085	496	155	117	401	305	14	291	162	184	242	70	135	21	43	25	28	36	0	0	135	1857	0.726979	0.115702	0.0475484	1.32222	1.41497	1.63347	1.4624	1.5682	2.13033	-0.138478	meso	arid
336	B	BB	5	5c	T_Aridiest_Patagonia	Rio Negro Province	Argentina	-41.1057	-66.0006	374	139	98	369	275	9	266	191	92	222	55	245	19	75	44	58	58	0	0	245	1661	1.47502	0.261261	0.100805	1.27875	1.65321	1.87506	1.77085	1.77085	2.38917	0.168796	supra	subarid
337	B	BB	5	5c	T_Aridiest_Patagonia	Chubut Province	Argentina	-43.4561	-67.0481	229	142	102	383	280	13	266	108	201	222	60	172	17	53	34	36	48	0	0	172	1699	1.01236	0.162162	0.0652667	1.23045	1.54407	1.72428	1.5682	1.6902	2.23553	0.00533507	supra	subarid
338	B	BB	5	5c	T_Aridiest_Patagonia	Chubut Province	Argentina	-43.8991	-69.0287	443	122	94	377	256	7	249	47	195	195	47	167	38	64	23	23	64	0	6	167	1459	1.14462	0.117949	0.0484219	1.57978	1.38021	1.80618	1.38021	1.81291	2.22272	0.0586612	supra	subarid
339	B	BB	5	5c	T_Aridiest_Patagonia	Santa Cruz Province	Argentina	-47.4561	-67.0481	72	115	80	373	226	14	213	89	137	180	47	185	24	66	35	47	53	0	4	185	1374	1.34643	0.261111	0.100753	1.38021	1.5563	1.81954	1.68124	1.73239	2.26717	0.129185	supra	subarid
340	B	BB	5	5c	T_Aridiest_Patagonia	Rio Negro Province	Argentina	-40.3732	-67.9408	875	111	102	375	256	-17	273	166	38	196	29	237	24	86	42	55	55	79	47	237	1335	1.77528	0.280612	0.107418	1.38021	1.63347	1.9345	1.74819	1.74819	2.37475	0.249267	supra	subarid
341	B	BB	5	5c	T_Aridiest_Patagonia	Chubut Province	Argentina	-45.962	-69.5247	410	100	86	374	223	-6	229	74	166	166	30	140	37	55	22	22	49	44	43	140	1199	1.16764	0.13253	0.0540498	1.5682	1.36173	1.74036	1.36173	1.69897	2.14613	0.0673089	supra	subarid
342	B	BB	5	5c	T_Aridiest_Patagonia	Santa Cruz Province	Argentina	-47.5241	-70.4077	752	65	78	354	183	-38	221	9	113	130	-5	135	27	52	25	30	41	134	182	123	787	1.5629	0.230769	0.0901766	1.43136	1.41497	1.716	1.49136	1.62325	2.08991	0.19393	oro	subarid
343	B	BB	5	5c	T_Aridiest_Patagonia	Santa Cruz Province	Argentina	-50.1199	-70.1676	249	83	75	353	195	-18	214	149	47	149	12	149	21	50	28	50	35	90	103	149	1000	1.49	0.33557	0.125667	1.32222	1.4624	1.69897	1.70757	1.5563	2.17319	0.173186	supra	subarid
344	B	BC	6	6a	Forest-Steppe_C_Europe	Lublin Voivodeship	Poland	50.9869	23.1321	208	81	73	254	234	-53	287	183	-23	183	-23	528	39	221	74	194	74	129	258	447	1030	4.33981	1.06011	0.31389	1.59106	1.87506	2.34439	2.29003	1.87506	2.65031	0.63747	supra	subhumid
345	B	BC	6	6a	Forest-Steppe_C_Europe	Jihomoravsky kraj	Czech Republic	48.8667	16.65	440	86	77	271	236	-47	283	181	-9	185	-13	633	39	262	96	225	100	120	206	533	1058	5.03781	1.21622	0.345612	1.59106	1.98677	2.4183	2.35411	2.00432	2.72673	0.702242	supra	subhumid
346	B	BC	6	6a	Forest-Steppe_C_Europe	Nitra Region	Slovakia	48.0857	17.9885	109	108	80	267	266	-34	300	185	42	212	1	545	24	184	93	169	107	95	132	513	1301	3.94312	0.79717	0.254589	1.38021	1.97313	2.26482	2.23045	2.03342	2.71012	0.59584	supra	subhumid
347	B	BC	6	6a	Forest-Steppe_C_Europe	Hajdu-Bihar	Hungary	47.5884	21.1771	85	109	82	266	271	-39	310	191	41	216	-3	539	29	208	93	165	108	99	144	506	1323	3.82464	0.763889	0.246471	1.4624	1.97313	2.31806	2.22011	2.03743	2.70415	0.582591	supra	subhumid
348	B	BC	6	6a	Forest-Steppe_C_Europe	Vojvodina	Serbia	45.9436	20.0157	86	115	88	279	278	-35	313	194	48	221	4	539	27	205	98	158	116	95	123	504	1382	3.64689	0.714932	0.234247	1.43136	1.99564	2.31175	2.2014	2.06819	2.70243	0.561922	supra	subhumid
349	B	BC	6	6a	Forest-Steppe_C_Europe	Calarasi County	Romania	44.2634	27.4364	16	122	88	269	289	-37	326	204	10	235	8	456	24	167	79	126	89	95	114	456	1461	3.12115	0.53617	0.186439	1.38021	1.90309	2.22272	2.1038	1.95424	2.65896	0.494315	meso	dry
350	B	BC	6	6a	Forest-Steppe_C_Europe	Mures County	Romania	46.6933	24.1413	379	96	79	265	249	-51	300	196	-9	198	-13	568	43	242	70	195	87	115	190	485	1175	4.12766	0.984848	0.297727	1.63347	1.85126	2.38382	2.29226	1.94448	2.68574	0.615704	supra	subhumid
351	B	BC	6	6a	Forest-Steppe_E_Europe	Kyiv Oblast	Ukraine	49.8075	31.1719	145	84	75	233	254	-68	321	201	-3	201	-36	539	31	219	89	219	95	136	309	433	1099	3.93995	1.08955	0.320053	1.49136	1.95424	2.34044	2.34242	1.98227	2.63649	0.59549	supra	subhumid
352	B	BC	6	6a	Forest-Steppe_E_Europe	Sumy Oblast	Ukraine	50.7477	34.1911	178	74	75	226	249	-84	333	196	-18	196	-53	624	27	242	114	242	115	148	385	453	1027	4.41091	1.23469	0.349218	1.43136	2.0607	2.38382	2.38561	2.06446	2.6561	0.644528	supra	subhumid
353	B	BC	6	6a	Forest-Steppe_E_Europe	Voronezh Oblast	Russia	51.7634	38.9526	170	67	76	213	254	-102	356	199	-34	199	-69	595	24	209	102	209	109	155	456	392	1009	3.88503	1.05025	0.311807	1.38021	2.01284	2.32015	2.32222	2.04139	2.59329	0.589395	supra	subhumid
354	B	BC	6	6a	Forest-Steppe_E_Europe	Penza Oblast	Russia	53.2599	44.5493	227	51	76	202	248	-128	376	192	-57	192	-94	569	19	185	101	185	108	168	570	359	932	3.85193	0.963542	0.29304	1.27875	2.0086	2.26717	2.26951	2.03743	2.55509	0.585679	supra	subhumid
355	B	BC	6	6a	Forest-Steppe_E_Europe	Republic of Bashkortostan	Russia	54.6891	55.3883	148	41	80	197	251	-153	404	195	-70	195	-118	509	25	167	76	167	96	177	676	331	914	3.62144	0.85641	0.268674	1.39794	1.88649	2.22272	2.22531	1.98677	2.51983	0.558882	supra	subhumid
356	B	BC	6	6a	Forest-Steppe_C_Asia	Kurgan Oblast	Russia	54.8859	63.6661	174	28	85	197	247	-186	433	192	-90	192	-144	396	47	184	44	184	48	183	804	294	880	3.34091	0.958333	0.291887	1.6721	1.65321	2.26482	2.26717	1.6902	2.46835	0.523865	supra	dry
357	B	BC	6	6a	Forest-Steppe_C_Asia	North Kazakhstan Region	Kazakhstan	55.0311	69.5566	134	22	85	193	244	-197	441	189	-98	189	-152	351	52	169	37	169	55	186	859	264	851	3.10223	0.89418	0.277421	1.716	1.57978	2.22789	2.23045	1.74819	2.4216	0.491674	supra	dry
358	B	BC	6	6a	Forest-Steppe_C_Asia	Novosibirsk Oblast	Russia	55.0396	81.754	161	13	84	187	239	-210	449	171	-103	183	-165	381	47	171	37	165	59	196	928	287	781	3.67478	0.901639	0.279128	1.6721	1.57978	2.233	2.22011	1.77815	2.45788	0.565231	oro	subhumid
359	B	BC	6	6a	Forest-Steppe_C_Asia	Altai Krai	Russia	52.9982	84.8716	286	23	92	206	245	-204	448	177	-90	187	-152	559	29	197	77	196	109	193	839	377	835	4.51497	1.04813	0.311357	1.4624	1.89209	2.29447	2.29447	2.04139	2.57634	0.654655	supra	subhumid
360	B	BC	6	6a	Forest-Steppe_C_Asia	Khovsgol Province	Mongolia	49.9852	98.0621	2390	-63	99	216	158	-303	460	100	-226	100	-238	277	122	240	7	240	11	270	1485	243	330	7.36364	2.4	0.531479	2.08636	0.90309	2.38021	2.38202	1.07918	2.38561	0.867092	crioro	humid
361	B	BC	6	6a	Forest-Steppe_C_Asia	Irkutsk Oblast	Russia	52.9231	103.202	482	9	94	198	238	-240	478	174	-99	183	-181	359	80	225	24	210	41	202	968	299	770	3.88312	1.14754	0.331941	1.90309	1.39794	2.35218	2.32428	1.62325	2.47567	0.58918	oro	subhumid
362	B	BC	6	6a	Forest-Steppe_C_Asia	Khentii Province	Mongolia	48.5644	111.518	1227	-9	104	200	233	-287	520	166	-194	174	-214	424	110	330	9	292	10	217	1140	385	699	5.50787	1.67816	0.427837	2.04139	1	2.51851	2.46687	1.04139	2.58546	0.740984	oro	subhumid
363	B	BC	6	6a	Forest-Steppe_C_Asia	Republic of Buryatia	Russia	52.4775	110.811	852	-15	93	183	230	-281	511	162	-202	172	-218	303	107	225	9	219	12	220	1184	256	650	3.93846	1.27326	0.356648	2.02938	1	2.35218	2.34242	1.11394	2.40824	0.595327	oro	subhumid
364	B	BC	6	6a	Forest-Steppe_C_Asia	Zabaykalsky Krai	Russia	52.5276	116.606	843	-30	98	175	227	-336	563	162	-233	173	-267	385	107	291	12	267	15	217	1368	345	663	5.20362	1.54335	0.405407	2.02938	1.11394	2.46389	2.42813	1.20412	2.53782	0.716306	oro	subhumid
365	B	BC	6	6a	Forest-Steppe_C_Asia	Inner Mongolia	China	50.2193	120.738	779	-19	93	168	234	-318	552	173	-227	181	-252	383	106	287	12	267	15	207	1285	338	723	4.67497	1.47514	0.393599	2.02531	1.11394	2.45788	2.42813	1.20412	2.52892	0.669778	oro	subhumid
366	B	BC	6	6a	Forest-Tallgrass_Steppe_N_America	Nebraska	USA	41.9313	-96.9827	473	97	99	246	299	-102	401	198	-51	235	-51	728	56	345	49	299	49	141	321	673	1294	5.20093	1.27234	0.356473	1.74819	1.69897	2.53782	2.47712	1.69897	2.82802	0.716081	supra	subhumid
367	B	BC	6	6a	Forest-Tallgrass_Steppe_N_America	Kansas	USA	39.2879	-95.8331	352	125	96	253	314	-67	381	216	-4	255	-15	961	49	411	79	328	84	110	170	902	1520	5.93421	1.28627	0.359128	1.6902	1.90309	2.61384	2.5172	1.92942	2.95521	0.773363	meso	subhumid
368	B	BC	6	6a	Forest-Tallgrass_Steppe_N_America	South Dakota	USA	44.6934	-97.277	521	68	96	226	281	-146	427	176	-93	215	-93	584	60	286	42	225	42	165	519	486	1079	4.50417	1.04651	0.311014	1.77815	1.63347	2.45637	2.35411	1.63347	2.68664	0.653615	supra	subhumid
369	B	BC	6	6a	Forest-Tallgrass_Steppe_N_America	North Dakota	USA	47.6878	-97.3353	309	50	94	212	267	-177	444	203	-113	204	-122	503	60	239	42	217	46	174	641	418	996	4.19679	1.06373	0.314652	1.77815	1.63347	2.3784	2.33846	1.6721	2.62118	0.622917	supra	subhumid
370	B	BC	6	6a	Forest-Tallgrass_Steppe_N_America	Manitoba	Canada	49.1005	-97.258	238	39	92	203	258	-193	451	195	-130	197	-139	519	52	234	56	203	66	179	721	408	940	4.34043	1.03046	0.307594	1.716	1.75587	2.36922	2.30963	1.82607	2.61066	0.637532	supra	subhumid
371	B	BC	6	6a	Forest-Tallgrass_Steppe_N_America	Minnesota	USA	44.9655	-94.7937	335	70	92	216	279	-147	426	180	-85	216	-94	701	55	314	58	309	60	159	512	604	1101	5.48592	1.43056	0.385706	1.74036	1.77085	2.49693	2.49136	1.78533	2.78104	0.73925	supra	subhumid
372	B	BC	6	6b	Steppes_E_Europe	Odesa Oblast	Ukraine	46.1925	29.4493	122	104	75	240	269	-45	314	216	22	220	-10	526	30	197	91	159	103	110	183	458	1270	3.6063	0.722727	0.236217	1.47712	1.96379	2.29447	2.20412	2.01703	2.66087	0.557062	supra	subhumid
373	B	BC	6	6b	Steppes_E_Europe	Mykolaiv Oblast	Ukraine	47.9316	32.9592	135	91	82	243	269	-68	337	211	1	213	-32	493	25	179	92	141	104	134	284	381	1170	3.25641	0.661972	0.220624	1.39794	1.96848	2.25285	2.15229	2.02119	2.58092	0.512739	supra	dry
374	B	BC	6	6b	Steppes_E_Europe	Donetsk Oblast	Ukraine	47.2337	38.1589	39	102	77	225	285	-59	344	228	125	231	-24	509	21	164	94	135	117	123	242	374	1284	2.91277	0.584416	0.199869	1.32222	1.97772	2.21484	2.13354	2.07188	2.57287	0.464307	supra	dry
375	B	BC	6	6b	Steppes_E_Europe	Volgograd Oblast	Russia	49.035	43.3276	135	82	85	219	289	-101	390	194	61	225	-64	378	18	120	74	114	79	149	416	258	1164	2.21649	0.506667	0.178017	1.25527	1.87506	2.07918	2.0607	1.90309	2.41162	0.345667	supra	dry
376	B	BC	6	6b	Steppes_E_Europe	Saratov Oblast	Russia	51.2405	43.9284	176	64	80	207	267	-120	386	208	-49	208	-85	481	21	160	81	160	93	161	521	298	1038	2.87091	0.769231	0.247784	1.32222	1.91381	2.20412	2.20683	1.97313	2.47422	0.458019	supra	dry
377	B	BC	6	6b	Steppes_E_Europe	Stavropol Krai	Russia	45.8732	41.7566	89	110	86	243	299	-55	354	201	19	239	-17	507	26	191	86	132	91	118	203	444	1358	3.26951	0.552301	0.190976	1.41497	1.93952	2.28103	2.12385	1.96379	2.64738	0.514483	supra	dry
378	B	BC	6	6b	Steppes_E_Europe	Samara Oblast	Russia	52.7724	50.1988	71	57	82	199	271	-141	413	211	-62	211	-104	385	23	136	65	136	72	166	602	245	1037	2.36258	0.64455	0.216047	1.36173	1.81954	2.13354	2.13672	1.86332	2.38917	0.373387	supra	dry
379	B	BC	6	6b	Steppes_E_Europe	Orenburg Oblast	Russia	52.4661	55.256	175	48	85	201	269	-155	425	80	-74	207	-119	441	20	136	75	132	89	172	671	273	996	2.74096	0.637681	0.214229	1.30103	1.88081	2.13354	2.12385	1.95424	2.43616	0.437903	supra	dry
380	B	BC	6	6b	Steppes_C_Asia	Kostanay Region	Kazakhstan	53.3977	62.6724	198	35	91	205	259	-184	442	201	-89	201	-139	313	44	147	37	147	43	179	774	230	945	2.43386	0.731343	0.238383	1.64345	1.57978	2.16732	2.17026	1.64345	2.36173	0.386296	supra	dry
381	B	BC	6	6b	Steppes_C_Asia	Karaganda Region	Kazakhstan	49.9088	73.4481	610	33	96	222	253	-179	433	192	-88	192	-134	321	35	129	47	129	53	186	760	227	902	2.51663	0.671875	0.223204	1.54407	1.68124	2.11059	2.11394	1.73239	2.35603	0.400819	supra	dry
382	B	BC	6	6b	Steppes_C_Asia	North Kazakhstan Region	Kazakhstan	53.4642	71.9139	145	28	91	200	258	-196	454	188	-100	199	-152	293	51	140	32	136	38	184	838	224	919	2.43743	0.683417	0.226192	1.70757	1.51851	2.14613	2.13672	1.59106	2.35025	0.386933	supra	dry
383	B	BC	6	6b	Steppes_C_Asia	Novosibirsk Oblast	Russia	53.9574	77.797	103	20	90	193	253	-212	465	194	-107	194	-163	297	56	147	28	147	33	190	901	231	868	2.66129	0.757732	0.244953	1.74819	1.4624	2.16732	2.17026	1.53148	2.36361	0.425092	supra	dry
384	B	BC	6	6b	Steppes_C_Asia	Altai Krai	Russia	52.3734	80.4525	212	29	94	205	259	-198	457	199	-95	199	-148	303	40	129	39	129	42	187	818	218	908	2.40088	0.648241	0.217021	1.60206	1.60206	2.11059	2.11394	1.63347	2.33846	0.380371	supra	dry
385	B	BC	6	6b	Steppes_C_Asia	Bulgan Province	Mongolia	47.6728	104.273	1276	11	112	223	245	-256	500	181	-164	181	-180	294	114	226	6	226	7	210	951	278	775	3.5871	1.24862	0.351916	2.0569	0.845098	2.35411	2.35603	0.90309	2.44404	0.554743	oro	dry
386	B	BC	6	6b	Steppes_C_Asia	Inner Mongolia	China	48.2186	116.961	697	9	102	187	266	-277	542	198	-213	205	-213	286	124	248	4	210	4	201	1076	276	885	3.11864	1.02439	0.306294	2.09342	0.69897	2.39445	2.32428	0.69897	2.44091	0.493966	supra	dry
387	B	BC	6	6b	Steppes_N_America	Saskatchewan province	Canada	50.6174	-108.427	641	47	101	249	254	-153	407	148	-93	189	-104	331	58	170	41	120	50	180	593	257	908	2.8304	0.634921	0.213497	1.76343	1.62325	2.23045	2.08279	1.70757	2.40993	0.451847	supra	dry
388	B	BC	6	6b	Steppes_N_America	Saskatchewan province	Canada	49.4623	-103.12	596	38	98	227	255	-176	431	148	-115	190	-126	421	55	202	50	163	55	186	684	331	889	3.72328	0.857895	0.269021	1.74036	1.70757	2.30535	2.21484	1.74819	2.51983	0.570926	supra	subhumid
389	B	BC	6	6b	Steppes_N_America	Montana	USA	47.3081	-108.793	991	77	109	286	287	-94	381	155	-37	211	-46	360	64	199	35	117	43	162	346	322	1049	3.06959	0.554502	0.191591	1.80618	1.5563	2.29885	2.07188	1.64345	2.50786	0.48708	supra	dry
390	B	BC	6	6b	Steppes_N_America	South Dakota	USA	43.2227	-102.681	1007	96	114	293	307	-82	388	179	-28	233	-28	462	60	237	36	129	36	154	264	423	1222	3.46154	0.553648	0.191353	1.77815	1.5682	2.37475	2.11394	1.5682	2.62634	0.539269	supra	dry
391	B	BC	6	6b	Steppes_N_America	North Dakota	USA	47.9377	-101.937	640	50	100	233	268	-159	427	156	-109	200	-109	420	72	241	30	156	30	180	603	363	953	3.80902	0.78	0.25042	1.85733	1.49136	2.38202	2.1959	1.49136	2.55991	0.580814	supra	subhumid
392	B	BC	6	6b	Steppes_N_America	Colorado	USA	39.1857	-102.418	1309	106	123	321	309	-76	385	231	-18	232	-18	388	68	194	22	185	22	147	198	373	1307	2.85386	0.797414	0.254648	1.83251	1.36173	2.2878	2.26951	1.36173	2.57171	0.455433	supra	dry
393	B	BC	6	6b	Steppes_N_America	Texas	USA	32.9871	-100.117	525	183	113	329	349	4	345	260	68	290	68	581	44	229	69	158	69	0	0	581	2194	2.64813	0.544828	0.18888	1.64345	1.8451	2.35984	2.2014	1.8451	2.76418	0.42294	thermo	dry
394	B	BC	6	6b	Steppes_N_America	Oklahoma	USA	36.6897	-100.239	746	142	116	304	335	-49	383	227	13	268	13	522	50	233	44	193	44	105	88	522	1701	3.06878	0.720149	0.235566	1.69897	1.65321	2.36736	2.2878	1.65321	2.71767	0.486966	meso	dry
395	B	BC	6	6b	Steppes_N_America	Kansas	USA	38.688	-98.5414	571	126	107	273	324	-68	392	216	-12	259	-12	641	51	281	47	235	47	117	161	608	1530	3.97386	0.907336	0.280427	1.70757	1.68124	2.44871	2.37291	1.68124	2.7839	0.599212	meso	subhumid
396	B	BC	6	6b	Steppes_N_America	Nebraska	USA	42.244	-102.71	1191	94	115	304	302	-77	379	176	-25	227	-25	403	71	221	23	145	23	157	252	379	1194	3.1742	0.638767	0.214517	1.85126	1.38021	2.34439	2.16435	1.38021	2.57864	0.501635	supra	dry
397	B	BC	6	6b	Desert_steppes_E_Europe	Autonomous Republic of Crimea	Ukraine	46.0656	34.1165	3	114	82	251	291	-36	327	198	138	235	0	386	18	128	81	97	85	101	141	357	1373	2.60015	0.412766	0.15007	1.25527	1.91381	2.10721	1.99123	1.9345	2.55267	0.414998	supra	dry
398	B	BC	6	6b	Desert_steppes_E_Europe	Republic of Kalmykia	Russia	47.3285	44.8621	3	99	90	224	315	-86	400	210	-8	246	-48	299	21	101	55	95	57	138	337	230	1314	1.75038	0.386179	0.141819	1.32222	1.74819	2.00432	1.98227	1.76343	2.36173	0.243132	supra	subarid
399	B	BC	6	6b	Desert_steppes_E_Europe	Stavropol Krai	Russia	45.001	44.3866	141	109	91	244	309	-65	374	205	-24	245	-24	387	37	157	59	136	59	126	233	321	1363	2.3551	0.555102	0.191759	1.5682	1.77815	2.1959	2.13672	1.77815	2.50651	0.372009	supra	dry
400	B	BC	6	6b	Desert_steppes_E_Europe	West Kazakhstan Region	Kazakhstan	50.1054	47.6253	49	75	87	207	298	-124	422	233	-45	233	-87	298	25	101	46	101	54	157	513	191	1166	1.63808	0.433476	0.156391	1.39794	1.6721	2.00432	2.0086	1.74036	2.28103	0.214335	supra	subarid
401	B	BC	6	6b	Desert_steppes_E_Europe	West Kazakhstan Region	Kazakhstan	50.4991	52.4474	44	70	90	202	303	-144	447	14	-58	236	-104	276	18	84	50	80	53	161	585	168	1171	1.43467	0.338983	0.126775	1.25527	1.70757	1.92428	1.90849	1.73239	2.22531	0.156752	supra	subarid
402	B	BC	6	6b	Desert_steppes_C_Asia	Aktobe Region	Kazakhstan	49.8887	57.4999	277	54	90	201	288	-161	449	223	-122	223	-122	298	13	86	60	86	60	172	676	183	1075	1.70233	0.38565	0.141654	1.11394	1.78533	1.9345	1.93952	1.78533	2.26245	0.231043	supra	subarid
403	B	BC	6	6b	Desert_steppes_C_Asia	Karaganda Region	Kazakhstan	49.8944	67.5114	386	39	96	207	274	-187	461	210	-94	210	-142	270	20	82	51	82	58	180	769	170	991	1.71544	0.390476	0.143164	1.30103	1.716	1.91381	1.91908	1.77085	2.23045	0.234375	supra	subarid
404	B	BC	6	6b	Desert_steppes_C_Asia	Karaganda Region	Kazakhstan	48.5114	72.4744	591	43	101	228	270	-174	444	204	-77	204	-126	261	23	91	50	91	51	182	706	169	974	1.73511	0.446078	0.160192	1.36173	1.70757	1.95904	1.96379	1.716	2.22789	0.239328	supra	subarid
405	B	BC	6	6b	Desert_steppes_C_Asia	East Kazakhstan Region	Kazakhstan	48.9946	77.4819	846	22	103	232	244	-199	443	180	-146	180	-146	213	60	112	21	112	21	199	832	172	815	2.11043	0.622222	0.21011	1.77815	1.34242	2.04922	2.05308	1.34242	2.23553	0.324371	supra	dry
406	B	BC	6	6b	Semi-deserts_C_Asia	Uvs Province	Mongolia	49.1466	92.3325	1366	-2	113	217	236	-285	521	177	-195	177	-212	115	120	98	3	98	4	208	1091	106	768	1.38021	0.553672	0.191359	2.07918	0.60206	1.99123	1.99564	0.69897	2.02531	0.139945	oro	subarid
407	B	BC	6	6b	Semi-deserts_C_Asia	Bayankhongor Province	Mongolia	46.4335	99.1816	2251	-22	119	244	209	-278	487	142	-184	142	-198	124	118	99	3	99	3	241	1156	108	538	2.00743	0.697183	0.229729	2.07188	0.60206	1.99564	2	0.60206	2.03342	0.302641	oro	dry
408	B	BC	6	6b	Semi-deserts_C_Asia	DundGobi Province	Mongolia	46.2996	107.17	1317	16	112	219	262	-246	508	186	-162	194	-180	156	126	136	3	123	4	207	945	148	837	1.76822	0.634021	0.213258	2.10037	0.60206	2.13354	2.09342	0.69897	2.17026	0.247536	supra	subarid
409	B	BC	6	6b	Sagebrush steppes_N_America	Idaho	USA	43.0722	-113.959	1368	97	107	277	317	-71	388	-29	237	237	-29	308	39	121	31	31	121	136	245	197	1224	1.60948	0.130802	0.0533864	1.59106	1.50515	2.08279	1.50515	2.08636	2.29447	0.206685	supra	subarid
410	B	BC	6	6b	Sagebrush steppes_N_America	Oregon	USA	43.1068	-119.506	1505	83	109	315	288	-60	348	-6	205	205	-19	260	27	84	40	40	80	159	235	186	1032	1.80233	0.195122	0.0774122	1.43136	1.61278	1.92428	1.61278	1.90849	2.26951	0.255833	supra	subarid
411	B	BC	6	6b	Sagebrush steppes_N_America	Nevada	USA	41.3914	-119.574	1822	79	114	315	288	-72	360	-28	203	203	-28	255	37	93	27	27	93	171	270	170	1012	1.67984	0.133005	0.0542318	1.5682	1.44716	1.96848	1.44716	1.97313	2.23045	0.225268	supra	subarid
412	C	CA	7	7a	Desert_steppes_C_Asia	Kostanay Region	Kazakhstan	50.34	63.7614	134	52	98	205	297	-182	478	198	-86	231	-136	214	23	67	34	67	38	174	734	138	1108	1.24549	0.290043	0.110604	1.36173	1.54407	1.82607	1.83251	1.59106	2.13988	0.0953393	supra	subarid
413	C	CA	7	7a	Cold_Deserts_C_Asia	Karaganda Region	Kazakhstan	47.4638	75.4231	515	54	102	225	284	-171	454	217	163	217	-118	161	22	53	25	53	40	174	656	96	1058	0.907372	0.24424	0.094904	1.34242	1.41497	1.72428	1.73239	1.61278	1.98227	-0.0422144	supra	arid
414	C	CA	7	7a	Cold_Deserts_C_Asia	Xinjiang	China	46.7133	89.0279	832	57	117	235	298	-200	497	-3	-122	228	-133	154	31	55	25	51	33	176	690	92	1117	0.823635	0.223684	0.0876694	1.49136	1.41497	1.74036	1.716	1.53148	1.96379	-0.0842653	supra	arid
415	C	CA	7	7a	Cold_Deserts_C_Asia	Karaganda Region	Kazakhstan	47.5215	69.3649	319	69	107	229	310	-156	467	143	183	240	-110	163	24	56	23	44	36	167	612	98	1194	0.820771	0.183333	0.0731071	1.38021	1.38021	1.74819	1.65321	1.5682	1.99123	-0.0857783	supra	arid
416	C	CA	7	7a	Cold_Deserts_C_Asia	Atyrau Region	Kazakhstan	48.8462	53.1313	13	83	94	206	323	-133	456	-45	-43	254	-93	192	20	65	37	46	42	154	525	108	1271	0.849725	0.181102	0.0722875	1.30103	1.57978	1.81291	1.6721	1.63347	2.03342	-0.0707218	supra	arid
417	C	CA	7	7a	Cold_Deserts_C_Asia	Aktobe Region	Kazakhstan	47.901	62.5919	64	78	102	213	326	-153	479	19	195	256	-109	142	20	45	28	31	29	160	595	84	1281	0.655738	0.121094	0.0496419	1.30103	1.4624	1.65321	1.50515	1.47712	1.92428	-0.18327	supra	arid
418	C	CA	7	7a	Cold_Deserts_C_Asia	Karaganda Region	Kazakhstan	47.2475	68.2908	337	69	107	229	312	-156	468	143	183	240	-110	158	25	56	22	40	37	167	614	92	1196	0.769231	0.166667	0.0669468	1.39794	1.36173	1.74819	1.61278	1.57978	1.96379	-0.113943	supra	arid
419	C	CA	7	7a	Cold_Deserts_C_Asia	Jambyl Region	Kazakhstan	44.9511	73.5914	509	93	108	225	330	-149	478	80	207	261	-91	168	34	62	17	34	40	150	488	127	1365	0.930403	0.130268	0.0531815	1.53148	1.25527	1.79239	1.54407	1.61278	2.1038	-0.0313289	supra	arid
420	C	CA	7	7a	Cold_Deserts_C_Asia	Mangystau Region	Kazakhstan	43.8448	54.9806	192	114	103	237	350	-86	436	95	272	274	-42	132	38	51	14	29	27	135	308	103	1483	0.694538	0.105839	0.0436921	1.57978	1.17609	1.70757	1.47712	1.44716	2.01284	-0.158304	meso	arid
421	C	CA	7	7a	Cold_Deserts_C_Asia	Navoiy Region	Uzbekistan	42.7806	62.8095	152	132	113	253	365	-81	446	121	230	291	-31	106	60	50	6	9	35	124	231	71	1653	0.429522	0.0309278	0.0132283	1.77815	0.845098	1.69897	1	1.5563	1.85126	-0.367015	meso	arid
422	C	CA	7	7a	Cold_Deserts_C_Asia	Kyzylorda Region	Kazakhstan	45.5209	62.821	84	102	106	225	347	-124	471	90	267	275	-77	128	37	51	16	22	36	146	446	94	1440	0.652778	0.08	0.0334238	1.5682	1.23045	1.70757	1.36173	1.5682	1.97313	-0.185235	meso	arid
423	C	CA	7	7a	Cold_Deserts_C_Asia	Turkistan Region	Kazakhstan	44.6254	68.5223	154	115	111	245	350	-104	454	105	218	276	-55	144	48	63	10	22	37	136	336	104	1521	0.683761	0.0797101	0.0333072	1.68124	1.04139	1.79934	1.36173	1.57978	2.01703	-0.165096	meso	arid
424	C	CA	7	7a	Desert_GR_Bas	Nevada	USA	40.1868	-117.966	1233	133	116	297	350	-40	389	150	269	269	9	167	27	53	22	22	50	98	94	167	1591	1.04965	0.0817844	0.0341407	1.43136	1.36173	1.72428	1.36173	1.70757	2.22272	0.0210463	meso	subarid
425	C	CA	7	7a	Desert_GR_Bas	Nevada	USA	38.244	-117.324	1597	129	120	316	336	-44	380	147	28	258	11	160	19	50	29	45	31	108	91	160	1550	1.03226	0.174419	0.0698229	1.27875	1.47712	1.69897	1.66276	1.50515	2.20412	0.0137883	meso	subarid
426	C	CA	7	7a	Taklamakan	Xinjiang	China	38.5222	78.1222	1202	126	121	275	330	-109	439	236	68	260	-47	29	84	18	1	14	1	122	247	28	1604	0.174564	0.0538462	0.0227772	1.92428	0.30103	1.25527	1.17609	0.30103	1.44716	-0.758046	meso	hyperarid
427	C	CA	7	7a	Taklamakan	Xinjiang	China	40.2884	82.4641	999	123	125	259	342	-141	484	248	48	273	-72	37	104	27	1	24	3	132	329	34	1632	0.208333	0.0879121	0.0365938	2.01703	0.30103	1.43136	1.39794	0.60206	1.53148	-0.681241	meso	hyperarid
428	C	CA	7	7a	Taklamakan	Xinjiang	China	39.1991	87.0794	962	132	127	265	357	-123	480	284	-20	284	-56	14	125	13	0	13	1	126	272	13	1695	0.0766962	0.0457746	0.0194381	2.09691	0	1.11394	1.14613	0.30103	1.11394	-1.11523	meso	hyperarid
429	C	CA	7	7a	Gobi	Umnugovi Province	Mongolia	43.208	100.952	1884	31	121	246	271	-220	491	191	-116	199	-153	111	115	91	3	80	3	204	795	102	891	1.14478	0.40201	0.146751	2.0607	0.60206	1.95904	1.90849	0.60206	2.0086	0.0587225	supra	subarid
430	C	CA	7	7a	Gobi	Inner Mongolia	China	40.1324	100.726	1298	92	125	263	322	-153	475	243	-59	250	-83	61	106	45	1	43	3	162	429	58	1313	0.441736	0.172	0.0689276	2.02531	0.30103	1.65321	1.64345	0.60206	1.76343	-0.354837	supra	arid
431	C	CA	7	7a	Gobi	Inner Mongolia	China	40.2621	104.825	1313	83	122	257	312	-163	474	235	-56	242	-93	95	111	77	1	63	2	166	478	92	1243	0.740145	0.260331	0.100484	2.04532	0.30103	1.88649	1.80618	0.477121	1.96379	-0.130683	supra	arid
432	C	CA	7	7a	Gobi	Omnogovi Province	Mongolia	42.4247	106.79	891	89	118	235	333	-171	503	254	-79	263	-103	96	106	79	3	57	3	162	513	91	1341	0.678598	0.21673	0.0851942	2.02531	0.60206	1.89763	1.76343	0.60206	1.95904	-0.168387	supra	arid
433	C	CA	7	7a	Gobi	Dornogovi Province	Mongolia	43.4397	111.343	1151	47	112	222	292	-214	505	217	-127	223	-150	121	115	103	3	81	3	186	742	114	1054	1.08159	0.363229	0.134569	2.0607	0.60206	2.01284	1.91381	0.60206	2.0569	0.0340642	supra	subarid
434	C	CA	7	7a	T_aridiest_cont_Asia	South Khorasan Province	Iran	32.1958	60.2581	1654	160	126	342	346	-24	370	88	271	271	39	146	109	95	0	0	85	70	18	146	1917	0.761607	0	0	2.03743	0	1.97772	0	1.9345	2.16435	-0.118269	thermo	arid
435	C	CA	7	7a	T_aridiest_cont_Asia	Dasoguz Region	Turkmenistan	39.983	60.3087	165	156	116	273	381	-46	427	145	297	305	6	97	78	58	1	4	30	97	107	97	1876	0.517058	0.0131148	0.00565864	1.89209	0.30103	1.76343	0.69897	1.49136	1.98677	-0.286461	meso	arid
436	C	CA	7	7a	T_aridiest_cont_Asia	Hamadan Province	Iran	35.186	48.8339	1683	128	120	294	344	-65	409	95	231	264	-5	345	73	172	3	5	119	114	147	307	1545	1.98706	0.0189394	0.00814835	1.86332	0.60206	2.23553	0.778151	2.07918	2.48714	0.29821	meso	subarid
437	C	CA	7	7b	T_aridiest_cont_Asia	Lebap Region	Turkmenistan	37.708	63.7956	226	183	122	305	395	-6	401	103	308	317	47	169	90	102	0	1	80	40	8	169	2190	0.771689	0.00315457	0.00136786	1.95424	0	2.0086	0.30103	1.90849	2.22789	-0.112557	thermo	arid
438	C	CA	7	7b	Desert_Chihuahua	Texas	USA	30.0988	-103.411	1176	183	124	384	333	11	322	262	136	266	83	351	73	183	23	163	29	0	0	351	2188	1.6042	0.612782	0.207576	1.86332	1.38021	2.26245	2.21484	1.47712	2.54531	0.20526	thermo	subarid
439	C	CA	7	7b	Desert_Chihuahua	Chihuahua	Mexico	30.5189	-106.108	1309	187	123	371	349	18	331	264	181	275	86	250	81	150	17	115	30	0	0	250	2244	1.11408	0.418182	0.151732	1.90849	1.25527	2.17609	2.06446	1.49136	2.39794	0.0469172	thermo	subarid
440	C	CA	7	7b	Desert_Chihuahua	Coahuila	Mexico	26.4829	-103.021	1136	222	122	431	350	68	282	256	193	283	142	178	65	88	10	66	27	0	0	178	2664	0.668168	0.233216	0.091039	1.81291	1.04139	1.94448	1.82607	1.44716	2.25042	-0.175114	infra	arid
441	C	CA	7	7b	Desert_Mohave	Nevada	USA	35.987	-114.912	761	202	124	330	401	23	378	99	281	324	83	166	44	63	12	62	47	0	0	166	2421	0.685667	0.191358	0.0760423	1.64345	1.11394	1.79934	1.79934	1.68124	2.22011	-0.163887	infra	arid
442	C	CA	7	7b	Desert_Mohave	California	USA	35.5488	-116.153	227	236	127	335	437	58	378	135	311	357	118	116	47	49	6	33	43	0	0	116	2828	0.410184	0.092437	0.0383964	1.6721	0.845098	1.6902	1.53148	1.64345	2.06446	-0.387021	infra	arid
443	C	CA	7	7b	Sahara_Arab	El Bayadh Province	Algeria	32.0812	0.7775	732	204	118	316	401	29	372	110	326	326	90	89	51	35	3	3	33	0	0	89	2448	0.363562	0.00920245	0.0039783	1.70757	0.60206	1.54407	0.60206	1.53148	1.94939	-0.439421	infra	hyperarid
444	C	CA	7	7b	Sahara_Arab	Ouargla Province	Algeria	31.9241	7.6834	153	226	116	326	410	55	355	160	337	337	113	49	75	27	0	0	20	0	0	49	2718	0.18028	0	0	1.87506	0	1.43136	0	1.32222	1.6902	-0.744053	infra	hyperarid
445	C	CA	7	7b	Sahara_Arab	Jabal al Gharbi district	Libya	30.1818	14.192	388	214	123	396	371	60	311	250	296	296	119	53	64	24	0	0	21	0	0	53	2573	0.205985	0	0	1.80618	0	1.38021	0	1.34242	1.72428	-0.686164	infra	hyperarid
446	C	CA	7	7b	Sahara_Arab_Tr	Al Wahat District	Libya	30.211	22.6778	59	222	118	404	371	79	292	139	297	300	135	22	111	16	0	0	16	0	0	22	2662	0.0826446	0	0	2.04532	0	1.20412	0	1.23045	1.34242	-1.08279	infra	hyperarid
447	C	CA	7	7b	Sahara_Arab_Tr	Helmand Province	Afghanistan	30.7631	63.8662	717	235	139	342	438	30	408	115	356	356	102	93	117	66	0	0	59	0	0	93	2819	0.329904	0	0	2.06819	0	1.81954	0	1.77815	1.96848	-0.481612	infra	hyperarid
448	C	CA	7	7b	Sahara_Arab	Tabuk Region	Saudi Arabia	29.5804	37.5588	985	200	134	379	374	20	353	90	292	298	90	51	80	27	0	0	27	0	0	51	2403	0.212235	0	0	1.90309	0	1.43136	0	1.44716	1.70757	-0.673184	thermo	hyperarid
449	C	CA	7	7b	Kalahari	Northern Cape province	South Africa	-25.802	20.7061	948	215	130	439	347	52	295	277	144	282	126	226	87	137	3	107	5	0	0	226	2577	0.876989	0.379433	0.1397	1.93952	0.60206	2.13672	2.03342	0.778151	2.35411	-0.057006	thermo	arid
450	C	CA	7	7b	Kalahari	Northern Cape province	South Africa	-27.4972	20.9815	884	206	133	441	345	44	300	258	133	277	117	198	80	112	6	84	7	0	0	198	2473	0.800647	0.303249	0.115027	1.90309	0.845098	2.04922	1.92942	0.90309	2.29667	-0.0965589	thermo	arid
451	C	CA	7	7b	Kalahari	Hardap Region	Namibia	-24.3734	19.5909	1155	213	128	451	339	55	284	266	130	274	130	256	103	177	1	120	1	0	0	256	2562	0.999219	0.437956	0.157746	2.01284	0.30103	2.24797	2.08279	0.30103	2.40824	-0.00033916	thermo	arid
452	C	CA	7	7b	Namib-Tr	Hardap Region	Namibia	-24.8361	15.8878	942	208	139	545	326	71	255	246	160	255	148	102	124	88	3	40	3	0	0	102	2499	0.408163	0.156863	0.0632818	2.09342	0.60206	1.94448	1.61278	0.60206	2.0086	-0.389166	thermo	arid
453	C	CA	7	7b	Namib	Karas Region	Namibia	-25.8269	15.347	642	192	105	545	280	88	193	225	185	230	148	45	89	33	3	23	7	0	0	45	2297	0.195908	0.1	0.0413927	1.94939	0.60206	1.51851	1.38021	0.90309	1.65321	-0.707948	meso	hyperarid
454	C	CA	7	7b	Namib	Karas Region	Namibia	-27.8298	16.1691	351	195	121	572	298	88	211	213	227	232	153	58	43	23	6	12	17	0	0	58	2334	0.2485	0.0517241	0.0219018	1.63347	0.845098	1.36173	1.11394	1.25527	1.76343	-0.604673	thermo	hyperarid
455	C	CA	7	7b	Namib	Northern Cape province	South Africa	-28.6366	16.5881	91	192	99	553	281	102	179	166	222	227	156	41	53	17	3	5	17	0	0	41	2309	0.177566	0.0220264	0.00946213	1.72428	0.60206	1.23045	0.778151	1.25527	1.61278	-0.75064	thermo	hyperarid
456	C	CA	7	7b	Des_Australia	Western Australia	Australia	-28.3765	125.616	360	210	117	421	341	64	277	281	210	283	124	232	30	86	31	70	49	0	0	232	2519	0.921	0.24735	0.0959883	1.47712	1.50515	1.9345	1.85126	1.69897	2.36549	-0.0357402	thermo	arid
457	C	CA	7	7b	Des_Australia	South Australia	Australia	-29.9682	140.951	91	213	107	375	352	66	286	296	171	297	120	170	29	62	29	59	35	0	0	170	2556	0.665102	0.198653	0.0786935	1.4624	1.47712	1.79239	1.77815	1.5563	2.23045	-0.177112	thermo	arid
458	C	CA	7	7b	Des_Australia	South Australia	Australia	-29.7023	129.302	204	186	111	440	313	61	252	230	123	249	115	186	12	52	40	47	42	0	0	186	2231	0.833707	0.188755	0.0750924	1.07918	1.61278	1.716	1.68124	1.63347	2.26951	-0.0789866	meso	arid
459	C	CA	7	7b	Des_Australia	South Australia	Australia	-29.309	136.828	15	219	110	383	359	73	287	301	178	301	127	132	33	54	20	40	28	0	0	132	2632	0.50152	0.13289	0.0541879	1.51851	1.32222	1.73239	1.61278	1.4624	2.12057	-0.299712	thermo	arid
460	C	CA	7	7b	T_aridiest_cont_Asia	Isfahan Province	Iran	34.2169	51.9408	834	209	123	297	418	4	414	123	305	339	70	122	88	76	1	3	56	0	0	122	2512	0.485669	0.00884956	0.00382641	1.94448	0.30103	1.88081	0.60206	1.75587	2.08636	-0.31366	infra	arid
461	C	CA	7	7b	T_aridiest_cont_Asia	Isfahan Province	Iran	34.3752	54.4954	710	218	123	297	426	12	414	87	349	349	76	73	92	41	0	0	40	0	0	73	2618	0.278839	0	0	1.96379	0	1.61278	0	1.61278	1.86332	-0.554647	infra	hyperarid
462	C	CA	7	7b	T_aridiest_cont_Asia	Jowzjan Province	Afghanistan	37.0678	65.8504	278	191	116	299	395	7	389	113	320	320	59	197	102	136	0	0	97	0	0	197	2290	0.860262	0	0	2.0086	0	2.13354	0	1.99123	2.29447	-0.0653693	thermo	arid
463	C	CA	7	7c	Des_Pacific_coast	Islay province	Peru	-16.9636	-71.775	1045	187	73	667	233	124	110	201	187	201	170	16	103	12	0	8	3	0	0	16	2243	0.071333	0.039801	0.0169502	2.01284	0	1.07918	0.954243	0.60206	1.20412	-1.14671	meso	hyperarid
464	C	CA	7	7c	Des_Pacific_coast	Arica and Parinacota region	Chile	-18.9439	-70.2687	958	173	49	526	215	122	94	156	174	193	152	19	111	14	0	6	5	0	0	19	2072	0.0916988	0.0310881	0.0132958	2.04532	0	1.14613	0.845098	0.778151	1.27875	-1.03764	meso	hyperarid
465	C	CA	7	7c	Sahara_Arab_Tr	Khuzestan Province	Iran	31.4327	49.0729	22	260	138	338	475	65	410	127	382	385	127	293	104	196	0	0	196	0	0	293	3119	0.939404	0	0	2.01703	0	2.29226	0	2.29447	2.46687	-0.0271478	infra	arid
466	C	CA	7	7c	Sahara_Arab_Tr	Al Madinah Province	Saudi Arabia	23.2095	39.5338	438	286	111	422	411	148	264	273	346	347	208	63	86	32	0	2	24	0	0	63	3433	0.183513	0.00576369	0.00249595	1.9345	0	1.50515	0.477121	1.39794	1.79934	-0.736333	infra	hyperarid
467	C	CA	7	7c	Sahara_Arab_Tr	Eastern Province	Saudi Arabia	26.9783	49.0448	35	275	124	352	453	100	353	159	376	376	159	94	100	62	0	0	62	0	0	94	3296	0.285194	0	0	2	0	1.79239	0	1.79934	1.97313	-0.544859	infra	hyperarid
468	C	CA	7	7c	Sahara_Arab_Tr	Sistan and Baluchestan Province	Iran	25.6072	60.9307	43	294	119	402	437	141	296	215	343	366	208	121	98	79	3	6	75	0	0	121	3534	0.342388	0.0163934	0.00706185	1.99123	0.60206	1.89763	0.845098	1.88081	2.08279	-0.465481	infra	hyperarid
469	C	CA	7	7c	Sahara_Arab_Tr	Eastern Province	Saudi Arabia	23.6206	50.8604	105	284	137	393	458	111	347	269	355	373	177	60	121	44	0	0	25	0	0	60	3402	0.176367	0	0	2.08279	0	1.64345	0	1.41497	1.77815	-0.753583	infra	hyperarid
470	C	CA	7	7c	Sahara_Arab_Tr	Rajasthan	India	26.9765	70.1471	106	283	129	382	438	101	337	329	260	359	177	153	133	147	4	35	4	0	0	153	3390	0.451327	0.097493	0.0404018	2.12385	0.69897	2.16732	1.5563	0.69897	2.18469	-0.345508	infra	arid
471	C	CA	7	7c	Sahara_Arab_Tr	Rajasthan	India	27.8587	71.9244	133	284	119	350	437	98	339	334	258	368	173	167	140	161	5	39	8	0	0	167	3408	0.490023	0.105978	0.0437466	2.14613	0.778151	2.20683	1.60206	0.954243	2.22272	-0.309783	infra	arid
472	C	CA	7	7c	Sahara_Arab_Tr	Northern state	Sudan	20.5636	27.4871	514	239	142	427	392	61	332	312	149	316	137	3	238	4	0	4	0	0	0	3	2871	0.0104493	0.0126582	0.0054629	2.37658	0	0.60206	0.69897	0	0.477121	-1.98091	infra	hyperarid
473	C	CA	7	7c	Sahara_Arab_Tr	Western Sahara	Western Sahara	24.853	-14.2337	132	231	117	507	354	123	231	200	266	280	183	35	79	17	0	4	15	0	0	35	2768	0.126445	0.0142857	0.00616031	1.89763	0	1.23045	0.69897	1.20412	1.54407	-0.898098	infra	hyperarid
474	C	CA	7	7c	Des_Australia Tr.	Western Australia	Australia	-24.311	115.709	260	245	116	420	377	101	275	319	234	319	162	218	72	116	8	116	71	0	0	218	2943	0.740741	0.363636	0.134699	1.85733	0.954243	2.06446	2.06819	1.85733	2.33846	-0.130334	infra	arid
475	C	CA	7	7c	Des_Australia Tr.	Western Australia	Australia	-25.2041	121.485	546	243	115	387	380	82	298	315	250	325	146	239	66	131	11	80	44	0	0	239	2920	0.818493	0.246154	0.0955717	1.81954	1.07918	2.11727	1.90849	1.65321	2.3784	-0.086985	infra	arid
476	C	CA	7	7c	Des_Australia Tr.	Western Australia	Australia	-23.6914	127.016	505	247	114	396	373	85	288	314	213	321	150	313	58	165	28	133	52	0	0	313	2967	1.05494	0.41433	0.150551	1.76343	1.4624	2.21748	2.1271	1.72428	2.49554	0.0232268	infra	subarid
477	C	CA	7	7c	Des_Australia Tr.	Northern Territory	Australia	-25.6039	137.834	56	243	114	379	381	81	300	323	204	327	143	171	55	78	13	59	38	0	0	171	2918	0.586018	0.180428	0.0720396	1.74036	1.14613	1.89209	1.77815	1.59106	2.233	-0.232089	infra	arid
478	C	CA	7	7c	Des_Australia Tr.	Western Australia	Australia	-22.1101	127.189	423	256	112	404	376	98	278	313	226	322	163	393	69	223	30	191	49	0	0	393	3070	1.28013	0.593168	0.202261	1.83885	1.49136	2.3483	2.2833	1.69897	2.59439	0.107254	infra	subarid
479	C	CA	7	7c	Desert_Sonora	Baja California Sur	Mexico	27.6866	-112.962	525	214	105	423	343	94	248	281	244	288	147	98	78	49	0	40	43	0	0	98	2568	0.38162	0.138889	0.0564814	1.89209	0	1.6902	1.61278	1.64345	1.99123	-0.418369	thermo	hyperarid
480	C	CA	7	7c	Desert_Sonora	Sonora	Mexico	28.7522	-111.719	14	248	69	324	348	135	213	318	288	318	177	164	94	109	4	109	42	0	0	164	2980	0.550336	0.342767	0.128001	1.97313	0.69897	2.03743	2.04139	1.63347	2.21484	-0.259372	infra	arid
481	C	CA	7	7c	Desert_Sonora	Sonora	Mexico	30.1755	-112.452	578	218	106	387	350	76	273	299	228	299	136	174	76	102	4	102	56	0	0	174	2615	0.665392	0.341137	0.127473	1.88081	0.69897	2.0086	2.01284	1.75587	2.24055	-0.176922	infra	arid
482	C	CA	7	7c	Des_Pacific_coast	Lambayeque province	Peru	-6.0526	-80.3043	27	242	71	613	295	180	115	264	229	264	224	98	169	117	1	117	3	0	0	98	2902	0.337698	0.443182	0.159321	2.22789	0.30103	2.06819	2.07188	0.60206	1.99123	-0.471471	infra	hyperarid
483	C	CA	7	7c	Des_Pacific_coast	Trujillo province	Peru	-8.0526	-79.097	60	235	46	612	269	194	75	251	233	251	225	48	98	37	3	37	3	0	0	48	2824	0.169972	0.14741	0.0597188	1.99123	0.60206	1.5682	1.57978	0.60206	1.68124	-0.769623	thermo	hyperarid
484	C	CA	7	7c	Des_Pacific_coast	Lima province	Peru	-12.2131	-76.9429	142	223	38	521	257	184	74	241	224	241	211	35	82	24	3	24	6	0	0	35	2678	0.130695	0.0995851	0.0412288	1.91381	0.60206	1.38021	1.39794	0.845098	1.54407	-0.883743	thermo	hyperarid
485	C	CA	7	7c	Des_Pacific_coast	Antofagasta region	Chile	-23.1748	-70.42	87	213	82	544	283	132	151	194	242	242	184	1	332	2	0	0	1	0	0	1	2561	0.00390472	0	0	2.52114	0	0.30103	0	0.30103	0	-2.40841	thermo	hyperarid
486	C	CA	7	7c	Sahara_Arab_Tr	Tagant region	Mauritania	17.6885	-10.4606	246	299	115	431	420	153	267	332	220	355	220	148	150	152	0	19	0	0	0	148	3587	0.412601	0.0535211	0.0226432	2.17609	0	2.18184	1.30103	0	2.17026	-0.38447	infra	arid
487	C	CA	7	7c	Sahara_Arab_Tr		Mali	21.4987	-4.72609	287	287	139	407	447	107	340	370	315	371	182	29	99	18	1	5	7	0	0	29	3445	0.08418	0.0134771	0.00581394	1.99564	0.30103	1.25527	0.778151	0.90309	1.4624	-1.07479	infra	hyperarid
488	C	CA	7	7c	Sahara_Arab_Tr		Lybia	21.1599	22.4847	591	239	145	434	390	56	334	313	151	313	136	1	332	2	0	2	0	0	0	1	2869	0.00348554	0.00638978	0.00276622	2.52114	0	0.30103	0.477121	0	0	-2.45773	infra	hyperarid
489	C	CA	7	7c	Sahara_Arab_Tr	Tombouctou region	Mali	17.6885	-4.1665	290	292	118	433	414	140	274	331	231	349	209	106	150	110	0	17	2	0	0	106	3499	0.302944	0.0487106	0.0206557	2.17609	0	2.04139	1.25527	0.477121	2.02531	-0.518638	infra	hyperarid
490	C	CA	7	7c	Sahara_Arab_Tr	Najran province	Saudi Arabia	18.0695	47.3205	621	287	127	408	435	124	311	290	212	361	194	55	144	59	0	6	4	0	0	55	3443	0.159744	0.0166205	0.00715886	2.15836	0	1.77085	0.845098	0.69897	1.74036	-0.796574	infra	hyperarid
491	C	CA	7	7c	Sahara_Arab_Tr	Agadez region	Niger	18.4198	12.0629	440	271	133	423	414	101	313	325	191	337	176	16	206	23	0	3	0	0	0	16	3247	0.0492763	0.00890208	0.00384902	2.31387	0	1.36173	0.60206	0	1.20412	-1.30736	infra	hyperarid
492	C	CA	7	7c	Sahara_Arab_Tr	Borkou region	Chad	17.5095	18.4155	244	293	123	433	424	139	285	332	222	352	209	19	178	24	0	5	0	0	0	19	3517	0.0540233	0.0142045	0.00612555	2.25042	0	1.38021	0.778151	0	1.27875	-1.26742	infra	hyperarid
493	C	CA	7	7c	Sahara_Arab_Tr	Kidal region	Mali	18.2432	1.6073	440	296	124	438	420	138	282	335	227	355	212	132	146	135	0	32	0	0	0	132	3549	0.371936	0.0901408	0.0374826	2.16435	0	2.13033	1.51851	0	2.12057	-0.429532	infra	hyperarid
494	C	CA	7	7c	Sahara_Arab_Tr	Dhofar Governorate	Oman	19.8932	54.8187	116	295	134	437	443	137	306	249	357	366	207	49	114	40	2	3	9	0	0	49	3539	0.138457	0.00819672	0.00354528	2.0569	0.477121	1.60206	0.60206	1	1.6902	-0.858684	infra	hyperarid
495	C	CA	7	7c	Sahara_Arab_Tr	Borkou region	Chad	16.687	19.9116	379	286	123	450	410	136	274	314	223	339	210	50	178	63	0	13	0	0	0	50	3436	0.145518	0.0383481	0.016343	2.25042	0	1.79934	1.14613	0	1.69897	-0.837083	infra	hyperarid
496	C	CA	7	7c	Sahara_Arab_Tr	North Darfur	Sudan	18.6406	27.1628	607	248	131	426	387	80	308	317	164	317	152	12	204	16	0	16	0	0	0	12	2978	0.0402955	0.0504732	0.021385	2.30963	0	1.20412	1.23045	0	1.07918	-1.39474	infra	hyperarid
497	C	CA	7	7c	Namib-Tr	Kunene Region	Namibia	-17.985	12.3635	814	216	118	657	295	116	179	236	188	237	188	112	126	102	0	59	0	0	0	112	2585	0.433269	0.248945	0.0965434	2.10037	0	2.0086	1.77815	0	2.04922	-0.363243	thermo	arid
498	C	CA	7	7c	Sahara_Arab_Tr	Somalia	Somalia	12.8536	41.6249	786	272	99	495	374	174	201	301	240	310	230	156	73	93	13	19	16	0	0	156	3269	0.47721	0.0612903	0.0258342	1.86332	1.14613	1.96848	1.30103	1.23045	2.19312	-0.32129	infra	arid
499	C	CA	7	7c	Sahara_Arab_Tr	Somalia	Somalia	10.0357	46.5377	869	254	99	569	330	156	174	268	218	279	218	259	84	169	8	101	8	0	0	259	3042	0.851414	0.362007	0.134179	1.92428	0.954243	2.22789	2.0086	0.954243	2.4133	-0.0698594	infra	arid
500	D	DA	8	8a	Trop_xer	Maharashtra	India	19.5804	77.4009	427	269	96	376	402	147	255	265	239	336	218	992	120	769	13	35	18	0	0	992	3233	3.06836	0.104167	0.0430346	2.07918	1.14613	2.88593	1.5563	1.27875	2.99651	0.486906	infra	dry
501	D	DA	8	8a	Trop_xer	Andhra Pradesh	India	15.2138	78.1473	199	289	92	457	393	191	202	289	269	334	249	542	89	317	2	115	8	0	0	542	3467	1.56331	0.344311	0.1285	1.94939	0.477121	2.50106	2.06446	0.954243	2.734	0.194045	infra	subarid
502	D	DA	8	8a	Trop_xer	Queensland	Australia	-20.2387	142.721	212	260	104	456	357	130	227	295	204	304	192	499	104	359	15	194	30	0	0	499	3116	1.60141	0.638158	0.214356	2.01703	1.20412	2.55509	2.29003	1.49136	2.6981	0.204503	infra	subarid
503	D	DA	8	8a	Trop_xer	Rio Grande do Norte	Brazil	-6.6699	-36.817	252	272	93	704	338	205	133	276	263	282	256	606	113	474	8	121	25	0	0	606	3258	1.86004	0.429078	0.155056	2.05308	0.954243	2.67578	2.08636	1.41497	2.78247	0.269522	infra	subarid
504	D	DA	8	8a	Trop_xer	Mexico	Mexico	29.2666	-110.201	599	212	131	430	366	62	304	281	231	286	131	521	118	440	11	354	78	0	0	521	2539	2.05199	1.23776	0.349814	2.07188	1.07918	2.64345	2.55023	1.89763	2.71684	0.312175	thermo	dry
505	D	DA	8	8a	Trop_xer	Mexico	Mexico	26.4028	-100.786	604	227	111	413	348	78	270	269	194	290	145	301	66	181	26	97	44	0	0	301	2718	1.10743	0.334483	0.125313	1.81954	1.43136	2.25768	1.99123	1.65321	2.47857	0.044317	infra	subarid
506	D	DA	8	8a	Trop_xer	Guajira	Venezuela	11.9723	-71.5702	105	271	27	498	297	243	54	276	261	280	258	321	99	237	12	135	17	0	0	321	3248	0.9883	0.482143	0.17089	1.99564	1.11394	2.37475	2.13354	1.25527	2.50651	-0.00511099	infra	arid
507	D	DA	8	8a	Trop_xer	Guajira	Venezuela	11.2342	-70.0148	73	277	55	610	323	233	90	283	264	288	264	400	67	224	20	141	20	0	0	400	3323	1.20373	0.489583	0.173065	1.82607	1.32222	2.35025	2.15229	1.32222	2.60206	0.0805297	infra	subarid
508	D	DA	8	8a	Trop_xer	Andes	Peru	-8.56569	-78.1999	1790	170	64	689	215	122	93	174	167	175	167	370	77	225	13	157	96	0	0	370	2044	1.81018	0.897143	0.2781	1.88649	1.14613	2.35218	2.19866	1.98677	2.5682	0.257721	meso	subarid
509	D	DA	8	8a	Trop_xer	Andes	Peru	-13.6047	-75.5223	2229	144	83	678	197	75	123	153	133	153	129	97	140	93	0	93	0	0	0	97	1723	0.562972	0.607843	0.206244	2.14613	0	1.96848	1.97313	0	1.98677	-0.249514	meso	arid
510	D	DA	8	8a	Trop_xer	Chaco	Bol-Argent	-30.0219	-66.8004	406	201	82	336	307	64	243	258	117	265	117	342	93	211	9	210	9	0	0	342	2409	1.41968	0.792453	0.253448	1.96848	1	2.32428	2.32428	1	2.53403	0.152189	thermo	subarid
511	D	DA	8	8a	Trop_xer	Chaco	Bol-Argent	-28.0307	-67.1673	1074	179	100	424	275	39	236	225	125	231	109	199	104	142	8	139	8	0	0	199	2143	0.928605	0.601732	0.20459	2.01703	0.954243	2.15229	2.14613	0.954243	2.29885	-0.0321691	meso	arid
512	D	DA	8	8a	Trop_xer	Chaco	Bol-Argent	-30.0219	-66.8004	406	201	82	336	307	64	243	258	117	265	117	342	93	211	9	210	9	0	0	342	2409	1.41968	0.792453	0.253448	1.96848	1	2.32428	2.32428	1	2.53403	0.152189	thermo	subarid
513	D	DA	8	8a	Trop_xer	Sahel	Sahel	15.29	-13.5057	68	289	114	502	398	171	227	296	306	324	241	476	143	435	0	74	1	0	0	476	3465	1.37374	0.228395	0.0893381	2.15534	0	2.63849	1.87506	0.30103	2.67761	0.137904	infra	subarid
514	D	DA	8	8a	Trop_xer	Sahel	Sahel	14.3192	-3.19719	283	289	115	465	405	157	247	286	252	338	233	538	133	497	0	52	0	0	0	538	3472	1.54954	0.153846	0.0621479	2.12385	0	2.69636	1.72428	0	2.73078	0.190203	infra	subarid
515	D	DA	8	8a	Trop_xer	Sahel	Sahel	13.7719	4.74132	279	290	112	465	408	167	240	282	259	337	241	481	137	460	0	64	0	0	0	481	3484	1.3806	0.189911	0.0755145	2.13672	0	2.66276	1.81291	0	2.68215	0.140067	infra	subarid
516	D	DA	8	8a	Trop_xer	Sahel	Sahel	12.5986	15.9975	293	283	110	452	402	159	244	274	251	330	235	427	143	435	0	44	0	0	0	427	3401	1.25551	0.133333	0.0543577	2.15534	0	2.63849	1.65321	0	2.63043	0.0988212	infra	subarid
517	D	DA	8	8a	Trop_xer	Sahel	Sahel	13.6968	20.5754	500	279	115	485	394	157	237	266	253	321	238	521	161	604	0	47	0	0	0	521	3343	1.55848	0.146417	0.0593428	2.20683	0	2.78104	1.68124	0	2.71684	0.192701	infra	subarid
518	D	DA	8	8a	Trop_xer	Sahel	Sahel	13.4684	29.8624	562	273	116	480	385	144	241	275	231	313	221	314	156	339	0	13	0	0	0	314	3276	0.958486	0.0415335	0.0176733	2.19312	0	2.5302	1.14613	0	2.49693	-0.0184142	infra	arid
519	D	DA	8	8a	Trop_xer	Namib-Botsw	Namib-Botsw	-21.7431	18.4245	1611	188	128	485	302	38	264	227	115	236	115	395	106	294	1	118	1	0	0	395	2261	1.74701	0.5	0.176091	2.02531	0.30103	2.46835	2.07555	0.30103	2.5966	0.242297	meso	subarid
520	D	DA	8	8a	Trop_xer	Namib-Botsw	Namib-Botsw	-26.4655	23.3929	1097	198	127	445	322	37	285	240	132	261	111	337	78	172	8	168	9	0	0	337	2376	1.41835	0.643678	0.215817	1.89209	0.954243	2.23553	2.22789	1	2.52763	0.151783	thermo	subarid
521	D	DA	8	8a	Trop_xer	India	India	30.1654	73.7732	169	252	122	349	407	58	349	321	220	339	135	268	115	214	7	54	23	0	0	268	3018	0.888005	0.159292	0.0641929	2.0607	0.90309	2.33041	1.74036	1.38021	2.42813	-0.0515844	infra	arid
522	D	DA	8	8a	Trop_xer	India	India	23.8645	73.9749	224	268	108	384	403	121	282	276	301	330	197	582	149	547	3	4	6	0	0	582	3215	1.81026	0.0121212	0.00523253	2.17319	0.60206	2.73799	0.69897	0.845098	2.76492	0.257742	infra	subarid
523	D	DA	8	8a	Trop_xer	India	India	21.9582	70.7639	148	262	109	437	373	123	250	289	213	304	202	705	152	689	1	197	3	0	0	705	3143	2.24308	0.648026	0.216964	2.18184	0.30103	2.83822	2.29667	0.60206	2.84819	0.350845	infra	dry
524	D	DA	8	8a	Trop_xer	Australia	Australia	-18.2691	127.034	371	273	106	453	375	141	234	297	223	316	207	448	110	340	7	63	18	0	0	448	3280	1.36585	0.199367	0.0789521	2.04139	0.90309	2.53148	1.80618	1.27875	2.65128	0.135404	infra	subarid
525	D	DA	8	8a	Trop_xer	Australia	Australia	-18.6396	135.274	210	265	110	448	368	124	245	303	207	313	190	449	106	342	9	163	15	0	0	449	3179	1.41239	0.520767	0.182063	2.02531	1	2.53403	2.21484	1.20412	2.65225	0.149956	infra	subarid
526	D	DA	8	8a	Trop_xer	Australia	Australia	-18.1757	123.248	93	280	112	489	381	153	228	301	264	316	223	632	126	544	5	188	21	0	0	632	3356	1.88319	0.594937	0.202743	2.10037	0.778151	2.7356	2.27646	1.34242	2.80072	0.274895	infra	subarid
527	D	DA	8	8a	Trop_xer	Australia	Australia	-21.3192	141.712	183	255	107	421	366	112	254	302	229	309	176	394	101	287	14	256	24	0	0	394	3062	1.28674	0.828479	0.26209	2.00432	1.17609	2.45788	2.40993	1.39794	2.5955	0.109491	infra	subarid
528	D	DA	8	8a	Trop_xer	Australia	Australia	-23.2061	143.084	273	242	108	404	362	94	267	299	211	306	157	361	77	231	19	173	37	0	0	361	2900	1.24483	0.565359	0.194614	1.88649	1.30103	2.36361	2.24055	1.57978	2.55751	0.0951092	infra	subarid
529	D	DA	8	8a	Trop_xer	Arabia-Yemen	Arabia-Yemen	13.8544	45.0986	1099	245	107	502	349	136	213	269	206	289	198	200	84	120	4	91	5	0	0	200	2934	0.681663	0.314879	0.118886	1.92428	0.69897	2.07918	1.96379	0.778151	2.30103	-0.16643	infra	arid
530	D	DA	8	8a	Trop_xer	Arabia-Yemen	Arabia-Yemen	17.9688	42.5978	846	265	103	485	369	157	212	263	277	306	214	179	69	93	11	34	26	0	0	179	3180	0.562893	0.111111	0.0457575	1.83885	1.07918	1.96848	1.54407	1.43136	2.25285	-0.249574	infra	arid
531	D	DA	8	8a	Trop_pluviseasonal_Asia	Madhya Pradesh	India	22.2985	75.7871	228	271	105	381	410	136	275	269	312	340	210	839	135	721	4	13	16	0	0	839	3253	2.57916	0.0382353	0.0162958	2.13033	0.69897	2.85794	1.14613	1.23045	2.92376	0.411478	infra	dry
532	D	DA	8	8b	Trop_pluviseasonal_America	Michoacan	Mexico	18.328	-103.102	1036	208	60	557	256	149	107	217	202	221	191	1217	109	854	9	361	70	0	0	1217	2499	4.86995	1.63348	0.420531	2.03743	1	2.93146	2.55871	1.85126	3.08529	0.687524	thermo	subhumid
533	D	DA	8	8b	Trop_pluviseasonal_America	Yucatan	Mexico	20.2431	-89.6415	68	262	77	525	336	190	146	275	236	284	230	1125	67	573	85	408	103	0	0	1125	3143	3.57938	1.43662	0.386788	1.82607	1.9345	2.75815	2.61172	2.01703	3.05115	0.553808	infra	dry
534	D	DA	8	8b	Trop_pluviseasonal_America	Guanacaste Province	Costa Rica	9.7788	-85.1884	36	271	24	486	300	252	48	262	275	283	262	2034	88	1226	17	101	1226	0	0	2034	3252	6.25461	0.35689	0.132545	1.94448	1.25527	3.08849	2.0086	3.08884	3.30835	0.7962	infra	humid
535	D	DA	8	8b	Trop_pluviseasonal_America	Guerrero	Mexico	17.0657	-100.062	364	255	67	575	314	197	117	254	253	269	243	1316	111	915	9	73	33	0	0	1316	3061	4.29925	0.271375	0.104274	2.04532	1	2.96142	1.86923	1.53148	3.11926	0.633393	infra	subhumid
536	D	DA	8	8b	Trop_pluviseasonal_America	Camaguey Province	Cuba	21.0418	-77.4884	92	255	54	518	305	200	105	267	233	275	233	1314	63	590	74	490	74	0	0	1314	3056	4.29974	1.78182	0.444329	1.79934	1.87506	2.77085	2.69108	1.87506	3.1186	0.633442	infra	subhumid
537	D	DA	8	8b	Trop_pluviseasonal_America	Casanare Department	Colombia	4.9074	-71.1731	128	255	48	573	305	221	84	247	263	268	244	2450	61	1167	92	102	1055	0	0	2450	3065	7.99347	0.380597	0.140067	1.78533	1.96848	3.06707	2.01284	3.02366	3.38917	0.902736	infra	humid
538	D	DA	8	8b	Trop_pluviseasonal_America	Apure	Venezuela	7.6764	-68.1348	58	273	57	493	345	230	115	255	281	298	255	1469	90	866	8	28	854	0	0	1469	3273	4.48824	0.0939597	0.0390013	1.95424	0.954243	2.93752	1.4624	2.93197	3.16702	0.652076	infra	subhumid
539	D	DA	8	8b	Trop_pluviseasonal_America	Bahia	Brazil	-12.1943	-44.1863	798	241	82	590	313	174	139	243	226	261	226	1047	84	553	4	201	4	0	0	1047	2895	3.61658	0.770115	0.248001	1.92428	0.69897	2.74273	2.30535	0.69897	3.01995	0.558298	thermo	subhumid
540	D	DA	8	8b	Trop_pluviseasonal_America	Goias	Brazil	-15.8526	-49.4301	695	241	81	567	314	171	142	238	224	258	224	1681	77	850	24	391	24	0	0	1681	2890	5.81661	1.5155	0.400625	1.88649	1.39794	2.92942	2.59329	1.39794	3.22557	0.76467	thermo	subhumid
541	D	DA	8	8b	Trop_pluviseasonal_America	Minas Gerais	Brazil	-18.715	-45.9105	918	214	81	558	277	132	145	225	185	229	185	1731	82	991	37	787	37	0	0	1731	2570	6.73541	3.43668	0.647058	1.91381	1.57978	2.99607	2.89653	1.57978	3.2383	0.828364	thermo	humid
542	D	DA	8	8b	Trop_pluviseasonal_America	Mato Grosso do Sul	Brazil	-19.3774	-53.4883	568	237	83	555	302	152	150	248	207	254	207	1528	64	772	66	438	66	0	0	1528	2847	5.36705	1.72441	0.435272	1.80618	1.82607	2.88762	2.64246	1.82607	3.18412	0.729736	thermo	subhumid
543	D	DA	8	8b	Trop_pluviseasonal_America	Santa Cruz Department	Bolivia	-17.9764	-60.5014	419	241	78	505	309	155	155	257	218	263	204	1082	58	488	73	398	78	0	0	1082	2892	3.74136	1.51331	0.400246	1.76343	1.86923	2.68842	2.60097	1.89763	3.03423	0.573029	thermo	subhumid
544	D	DA	8	8b	Trop_pluviseasonal_America	Boqueron department	Paraguay	-22.1986	-59.6793	127	248	85	456	331	145	186	288	209	288	194	940	55	413	66	413	73	0	0	940	2974	3.16073	1.43403	0.386326	1.74036	1.82607	2.61595	2.617	1.86923	2.97313	0.499787	infra	dry
545	D	DA	8	8b	Trop_pluviseasonal_America	Chaco Province	Argentina	-27.4647	-60.3897	77	211	90	418	311	96	215	251	160	268	146	1076	55	463	73	392	82	0	0	1076	2532	4.24961	1.46269	0.391409	1.74036	1.86923	2.66558	2.59439	1.91908	3.03181	0.628349	thermo	subhumid
546	D	DA	8	8b	Trop_pluviseasonal_America	Mato Grosso	Brazil	-15.1932	-54.5327	695	236	76	552	300	162	137	237	218	248	218	1849	74	952	32	417	32	0	0	1849	2827	6.5405	1.68145	0.42837	1.86923	1.51851	2.97864	2.62118	1.51851	3.26694	0.815611	thermo	humid
547	D	DA	8	8b	Trop_pluviseasonal_Africa	Kankan Region	Guinea	9.0431	-8.9586	662	238	76	456	325	159	166	223	229	262	223	2406	78	1301	27	217	1301	0	0	2406	2853	8.43323	0.828244	0.262034	1.89209	1.44716	3.11428	2.33846	3.11461	3.3813	0.925994	thermo	humid
548	D	DA	8	8b	Trop_pluviseasonal_Africa	Brong-Ahafo region	Ghana	7.9271	-0.74	125	274	71	513	355	216	139	254	277	298	254	1172	68	550	23	149	550	0	0	1172	3288	3.56448	0.5	0.176091	1.83251	1.38021	2.74036	2.17609	2.74115	3.06893	0.551996	infra	dry
549	D	DA	8	8b	Trop_pluviseasonal_Africa	Ouham Prefecture	Central African Republic	6.3701	17.5996	492	256	79	501	342	184	158	241	251	282	241	1466	82	800	3	101	800	0	0	1466	3078	4.76283	0.358156	0.13295	1.91381	0.60206	2.90309	2.0086	2.90363	3.16613	0.677865	infra	subhumid
550	D	DA	8	8b	Trop_pluviseasonal_Africa	Western Equatoria	South Sudan	5.0942	29.9324	682	245	72	527	330	194	137	228	254	271	227	1334	70	607	16	134	595	0	0	1334	2937	4.54205	0.494465	0.174486	1.8451	1.23045	2.78319	2.13033	2.77525	3.12516	0.657252	infra	subhumid
551	D	DA	8	8b	Trop_pluviseasonal_Africa	Oromia State	Ethiopia	5.7162	41.2376	472	272	86	632	345	209	136	268	274	285	254	431	109	290	8	85	179	0	0	431	3267	1.31925	0.298246	0.113357	2.03743	0.954243	2.4624	1.9345	2.25527	2.63448	0.120328	infra	subarid
552	D	DA	8	8b	Trop_pluviseasonal_Africa	Kilifi County	Kenya	-3.5001	39.4885	233	255	59	540	312	203	109	258	268	273	236	695	55	371	62	102	115	0	0	695	3062	2.26976	0.373626	0.137869	1.74036	1.79934	2.56937	2.01284	2.06446	2.84198	0.35598	infra	dry
553	D	DA	8	8b	Trop_pluviseasonal_Africa	Morogoro Region	Tanzania	-7.9807	37.4002	257	248	77	586	309	178	132	249	230	262	226	1145	78	653	30	386	46	0	0	1145	2973	3.85133	1.47328	0.393274	1.89209	1.49136	2.81491	2.58771	1.6721	3.05881	0.585611	infra	subhumid
554	D	DA	8	8b	Trop_pluviseasonal_Africa	Haut-Lomami Province	Democratic Republic of the Congo	-8.3805	26.4572	567	247	84	540	335	180	156	232	245	274	232	1138	85	609	0	58	609	0	0	1138	2960	3.84459	0.211679	0.0833875	1.92942	0	2.78462	1.77085	2.78533	3.05614	0.584851	infra	subhumid
555	D	DA	8	8b	Trop_pluviseasonal_Africa	Cuanza Sul Province	Angola	-10.7988	14.4757	1122	197	86	602	257	114	143	206	180	206	180	985	87	542	0	542	0	0	0	985	2359	4.1755	2.63107	0.560034	1.93952	0	2.734	2.7348	0	2.99344	0.620708	thermo	subhumid
556	D	DA	8	8b	Trop_pluviseasonal_Africa	Nampula Province	Mozambique	-14.8287	37.0896	601	229	85	493	312	140	172	240	200	259	191	974	122	745	3	123	5	0	0	974	2748	3.5444	0.474903	0.168764	2.08636	0.60206	2.87216	2.09342	0.778151	2.98856	0.549542	thermo	dry
557	D	DA	8	8b	Trop_pluviseasonal_Africa	Mahajanga Province	Madagascar	-16.0739	46.8358	28	273	81	597	336	201	135	275	252	287	252	1459	119	1113	3	248	3	0	0	1459	3281	4.44681	0.864111	0.270472	2.07555	0.60206	3.0465	2.3962	0.60206	3.16406	0.648049	infra	subhumid
558	D	DA	8	8b	Trop_pluviseasonal_Africa	Masvingo Province	Zimbabwe	-21.0463	30.5079	616	218	109	500	311	94	217	253	175	253	158	485	93	304	8	304	12	0	0	485	2616	1.85398	1.20158	0.342735	1.96848	0.954243	2.48287	2.4843	1.11394	2.68574	0.268104	thermo	subarid
559	D	DA	8	8b	Trop_pluviseasonal_Africa	Southern Province	Zambia	-16.0424	26.2778	1020	217	102	456	325	101	224	229	167	258	167	717	122	555	0	160	0	0	0	717	2610	2.74713	0.620155	0.209557	2.08636	0	2.74429	2.20683	0	2.85552	0.438879	thermo	dry
560	D	DA	8	8b	Trop_pluviseasonal_Africa	North Region	Cameroon	8.0356	14.2958	666	251	91	489	354	168	185	232	238	286	232	1145	95	732	1	157	732	0	0	1145	3014	3.79894	0.548951	0.190038	1.97772	0.30103	2.86451	2.19866	2.8651	3.05881	0.579662	infra	subhumid
561	D	DA	8	8b	Trop_pluviseasonal_Africa	Federal Capital Territory	Nigeria	8.64	7.0894	181	271	74	485	355	203	152	249	272	297	249	1078	88	612	4	48	612	0	0	1078	3247	3.31999	0.161616	0.0650626	1.94448	0.69897	2.78675	1.6902	2.78746	3.03262	0.521136	infra	dry
562	D	DA	8	8b	Trop_pluviseasonal_Africa	Guera Region	Chad	10.6201	18.0602	381	273	98	464	383	172	211	252	267	316	250	830	113	634	0	49	0	0	0	830	3275	2.53435	0.155063	0.0626058	2.05308	0	2.80209	1.69897	0	2.91908	0.403867	infra	dry
563	D	DA	8	8b	Trop_pluviseasonal_Africa	Mbomou	Central African Republic	6.402	23.8683	734	241	78	534	327	181	146	228	246	263	226	1714	72	805	31	167	775	0	0	1714	2897	5.91647	0.634981	0.213513	1.85733	1.50515	2.9058	2.22531	2.88986	3.23401	0.772062	thermo	subhumid
564	D	DA	8	8b	Trop_pluviseasonal_Africa	Lunda Sul Province	Angola	-9.5837	21.7749	1081	210	79	514	294	141	153	203	206	230	202	1591	79	759	2	124	746	0	0	1591	2523	6.30598	0.53913	0.187275	1.89763	0.477121	2.88024	2.09691	2.87332	3.20167	0.799753	thermo	humid
565	D	DA	8	8b	Trop_pluviseasonal_Asia	Uttar Pradesh	India	25.5965	80.9197	109	258	103	321	410	89	321	292	331	335	161	909	141	902	13	127	47	0	0	909	3095	2.937	0.379104	0.139597	2.14922	1.14613	2.95521	2.10721	1.68124	2.95856	0.467903	infra	dry
566	D	DA	8	8b	Trop_xer	Chhattisgarh	India	23.062	83.0408	552	245	97	341	388	104	284	261	184	313	171	1335	126	1156	20	37	52	0	0	1335	2945	4.53311	0.118211	0.0485237	2.10037	1.32222	3.06296	1.57978	1.72428	3.12548	0.656396	infra	subhumid
567	D	DA	8	8b	Trop_pluviseasonal_Asia	Tamil Nadu	India	11.5604	78.2219	450	269	85	506	352	184	168	266	249	299	236	1134	74	652	28	264	80	0	0	1134	3225	3.51628	0.882943	0.274837	1.86923	1.4624	2.81425	2.42325	1.90849	3.05461	0.546083	infra	dry
568	D	DA	8	8b	Trop_pluviseasonal_Asia	Chin State	Myanmar (Burma)	22.0697	93.936	584	234	77	352	329	111	218	254	177	266	177	1563	82	833	26	388	26	0	0	1563	2808	5.56624	1.45865	0.390696	1.91381	1.43136	2.92065	2.58995	1.43136	3.19396	0.745562	infra	subhumid
569	D	DA	8	8b	Trop_pluviseasonal_Asia	Mandalay Region	Myanmar (Burma)	20.2582	96.4869	739	225	74	337	327	109	218	236	224	258	177	1295	85	742	16	391	30	0	0	1295	2700	4.7963	1.5155	0.400625	1.92942	1.23045	2.8704	2.59329	1.49136	3.11227	0.680906	infra	subhumid
570	D	DA	8	8b	Trop_pluviseasonal_Asia	Khon Kaen Province	Thailand	16.4821	102.935	158	271	67	417	339	177	162	279	231	295	231	1271	84	715	12	435	12	0	0	1271	3250	3.91077	1.47458	0.393501	1.92428	1.11394	2.85431	2.63949	1.11394	3.10415	0.592262	infra	subhumid
571	D	DA	8	8b	Trop_pluviseasonal_Asia	Vientiane Province	Laos	18.3105	102.485	170	263	66	420	321	164	157	280	220	284	220	2037	94	1211	16	1019	16	0	0	2037	3150	6.46667	3.58803	0.661626	1.97313	1.23045	3.08314	3.0086	1.23045	3.30899	0.81068	infra	humid
572	D	DA	8	8b	Trop_pluviseasonal_Asia	Kratie Province	Cambodia	12.6821	105.964	39	274	57	468	335	212	122	270	261	291	261	1795	80	921	15	217	15	0	0	1795	3289	5.45759	0.745704	0.241971	1.90309	1.20412	2.96426	2.33846	1.20412	3.25406	0.737001	infra	subhumid
573	D	DA	8	8b	Trop_pluviseasonal_Asia	Gia Lai Province	Vietnam	13.1461	108.625	404	250	52	460	302	189	113	253	225	270	219	1704	74	974	43	445	151	0	0	1704	2999	5.68189	1.64815	0.422942	1.86923	1.64345	2.98856	2.64933	2.18184	3.23147	0.754493	infra	subhumid
574	D	DA	8	8b	Trop_pluviseasonal_Asia	Vinh Phuc Province	Vietnam	21.3136	105.557	15	241	61	320	323	133	190	289	171	293	171	1790	75	961	71	875	71	0	0	1790	2893	6.18735	2.98635	0.600575	1.87506	1.85733	2.98272	2.9425	1.85733	3.25285	0.791505	infra	humid
575	D	DA	8	8b	Trop_pluviseasonal_Asia	West Bengal	India	21.9653	87.3027	21	265	75	342	353	135	218	287	197	306	197	1536	91	932	32	268	32	0	0	1536	3173	4.84084	0.875817	0.27319	1.95904	1.51851	2.96942	2.42975	1.51851	3.18639	0.684921	infra	subhumid
576	D	DA	8	8b	Trop_pluviseasonal_Australia	Northern Territory	Australia	-13.9515	130.6	28	279	88	525	352	185	167	285	254	300	243	1207	108	865	5	258	8	0	0	1207	3343	3.61053	0.86	0.269513	2.03342	0.778151	2.93702	2.4133	0.954243	3.08171	0.557571	infra	subhumid
577	D	DA	8	8b	Trop_pluviseasonal_Australia	Northern Territory	Australia	-13.0219	135.725	72	266	79	519	342	190	152	274	239	289	236	1243	103	790	5	421	14	0	0	1243	3197	3.88802	1.45675	0.390361	2.01284	0.778151	2.89763	2.62531	1.17609	3.09447	0.589728	infra	subhumid
578	D	DA	8	8b	Trop_pluviseasonal_Australia	Queensland	Australia	-15.7903	142.168	33	269	88	517	349	179	170	280	233	297	233	1147	120	932	5	396	5	0	0	1147	3227	3.55438	1.33333	0.367977	2.07918	0.778151	2.96942	2.59879	0.778151	3.05956	0.550764	infra	dry
579	D	DA	8	8b	Trop_pluviseasonal_Australia	Queensland	Australia	-15.4239	143.474	168	258	86	535	336	174	161	271	229	284	225	1103	118	881	6	423	10	0	0	1103	3092	3.56727	1.48944	0.396101	2.07188	0.845098	2.94498	2.62737	1.04139	3.04258	0.552336	infra	dry
580	D	DA	8	8b	Trop_pluviseasonal_Australia	Queensland	Australia	-20.3178	146.985	325	232	92	461	320	121	199	268	210	271	176	809	79	491	36	431	64	0	0	809	2779	2.91112	1.59041	0.413368	1.89763	1.5682	2.69108	2.63548	1.81291	2.90795	0.46406	thermo	dry
581	D	DA	8	8b	Trop_pluviseasonal_Australia	Western Australia	Australia	-15.7498	126.786	440	263	98	503	353	157	196	272	233	293	220	963	117	738	1	200	6	0	0	963	3152	3.0552	0.682594	0.225979	2.06819	0.30103	2.86806	2.3032	0.845098	2.98363	0.48504	infra	dry
582	D	DB	8	8b	Trop_rainf_Caribbean	La Espanola	La Espanola	18.1886	-71.1635	320	246	50	558	288	199	89	256	229	261	229	1154	54	486	105	323	105	0	0	1154	2955	3.90525	1.23755	0.349772	1.73239	2.02531	2.68664	2.51055	2.02531	3.06221	0.591648	infra	subhumid
583	D	DB	9	9a	Trop_rainf_America	Vichada Department	Colombia	3.5672	-69.7329	121	244	40	627	280	216	64	235	250	250	235	2840	46	1195	290	290	1195	0	0	2840	2927	9.70277	1.16	0.334454	1.66276	2.46389	3.07737	2.46389	3.07773	3.45332	0.986896	infra	humid
584	D	DB	9	9a	Trop_rainf_Africa	Somalia	Somalia	2.25837	29.8624	1062	213	66	637	276	171	104	205	218	225	203	1492	33	506	164	190	476	0	0	1492	2554	5.84182	0.844444	0.265866	1.51851	2.21748	2.70415	2.28103	2.67852	3.17377	0.766548	thermo	subhumid
585	D	DB	9	9a	Trop_rainf_America	State of Amazonas	Brazil	-2.52326	-60.9069	16	262	47	672	301	232	69	259	263	269	258	2343	42	887	252	379	321	0	0	2343	3143	7.45466	1.40892	0.381823	1.62325	2.40312	2.94792	2.57978	2.50786	3.36977	0.872428	infra	humid
586	D	DB	9	9a	Trop_rainf_America	State of Para	Brazil	-3.6217	-54.0197	228	249	44	647	286	218	68	243	246	256	243	1737	63	912	163	197	779	0	0	1737	2983	5.823	0.769531	0.247858	1.79934	2.21484	2.95999	2.29667	2.89209	3.2398	0.765147	infra	subhumid
587	D	DB	9	9a	Trop_rainf_America	State of Amazonas	Brazil	-3.0894	-65.4157	86	254	41	663	286	224	63	254	250	258	247	3295	24	1108	525	752	617	0	0	3295	3043	10.8281	2.91473	0.592702	1.38021	2.72099	3.04454	2.87679	2.79099	3.51786	1.03455	infra	humid
588	D	DB	9	9a	Trop_rainf_America	State of Amazonas	Brazil	-4.7351	-68.8216	158	248	45	660	284	215	69	249	244	253	241	3003	32	1028	355	780	396	0	0	3003	2981	10.0738	3.083	0.61098	1.50515	2.55145	3.01199	2.89265	2.59879	3.47756	1.00319	infra	humid
589	D	DB	9	9a	Trop_rainf_America		Brazil	-7.21328	-69.4674	194	247	48	631	283	206	76	248	239	252	239	2029	49	816	150	432	150	0	0	2029	2963	6.84779	1.71429	0.433656	1.6902	2.17898	2.91169	2.63649	2.17898	3.30728	0.83555	infra	humid
590	D	DB	9	9a	Trop_rainf_America	Loreto Region	Peru	-3.7486	-74.6317	133	249	43	657	281	216	65	252	243	253	241	2846	11	789	570	745	632	0	0	2846	2982	9.54393	2.94466	0.59601	1.04139	2.75664	2.89708	2.87274	2.8014	3.45423	0.979727	infra	humid
591	D	DB	9	9a	Trop_rainf_America	Arauca Department	Colombia	6.182	-72.0563	1052	215	63	751	257	173	83	211	214	219	207	2860	52	1162	142	324	1108	0	0	2860	2578	11.0939	1.47945	0.394356	1.716	2.15534	3.06521	2.51188	3.04493	3.45637	1.04508	thermo	humid
592	D	DB	9	9a	Trop_rainf_America	Cuyuni-Mazaruni Region	Guayana	6.5742	-59.3448	125	246	50	629	287	208	79	246	254	254	237	2449	34	960	368	368	484	0	0	2449	2946	8.31297	1.44882	0.388957	1.53148	2.56703	2.98227	2.56703	2.68574	3.38899	0.919756	infra	humid
593	D	DB	9	9a	Trop_rainf_America	State of San Paulo	Brazil	-24.7915	-47.94	82	220	55	417	282	149	132	255	187	255	184	1832	43	769	211	769	253	0	0	1832	2640	6.93939	3.01569	0.60376	1.63347	2.32634	2.88593	2.88649	2.40483	3.26293	0.841322	thermo	humid
594	D	DB	9	9a	Trop_rainf_America	State of Para	Brazil	-5.333	-57.4711	128	259	51	649	302	224	78	252	262	267	251	2304	52	924	161	418	917	0	0	2304	3101	7.42986	1.56554	0.409179	1.716	2.20952	2.96567	2.62221	2.96284	3.36248	0.870981	infra	humid
595	D	DB	9	9a	Trop_rainf_America	Amazonas Department	Colombia	-1.51825	-70.4318	90	247	41	647	281	218	63	247	247	253	239	3800	23	1281	642	830	937	0	0	3800	2967	12.8075	3.28063	0.631508	1.36173	2.80821	3.10755	2.9196	2.9722	3.57978	1.10747	infra	hyperhumid
596	D	DB	9	9a	Trop_rainf_America	State of Amazonas	Brazil	-6.50682	-61.9777	69	256	47	612	297	220	77	253	253	260	252	2324	47	909	176	476	893	0	0	2324	3065	7.58238	1.83077	0.451904	1.6721	2.24797	2.95856	2.67852	2.95134	3.36624	0.879806	infra	humid
597	D	DB	9	9a	Trop_rain_Africa	Litoral Province	Equatorial Guinea	2.0783	10.0737	169	248	39	598	282	217	65	243	237	257	237	2859	58	1514	243	838	243	0	0	2859	2970	9.62626	3.2607	0.629481	1.76343	2.38739	3.18013	2.92376	2.38739	3.45621	0.983458	infra	humid
598	D	DB	9	9a	Trop_rain_Africa	Equateur Province	Democratic Republic of the Congo	0.7304	19.5669	362	241	44	643	280	211	69	236	247	249	235	1963	27	665	296	419	631	0	0	1963	2888	6.79709	1.68273	0.428577	1.43136	2.47276	2.82282	2.62325	2.80072	3.29292	0.832323	thermo	humid
599	D	DB	9	9a	Trop_rain_Africa	Tshopo Province	Democratic Republic of the Congo	1.1163	25.9483	511	230	45	629	271	200	72	227	232	239	223	1881	32	654	225	433	498	0	0	1881	2765	6.80289	1.81172	0.448971	1.50515	2.35411	2.81558	2.63749	2.6981	3.27439	0.832694	thermo	humid
600	D	DB	9	9a	Trop_rain_Africa		Congo	1.56372	14.8977	559	229	47	632	271	196	75	225	230	239	221	1931	40	798	207	550	340	0	0	1931	2755	7.00907	2.30126	0.518679	1.60206	2.31806	2.902	2.74115	2.53275	3.28578	0.845661	thermo	humid
601	D	DB	9	9a	Trop_rain_Africa	Toamasina Province	Madagascar	-19.6313	48.6571	225	225	49	436	276	165	111	253	200	253	191	2202	52	999	250	999	329	0	0	2202	2701	8.15254	3.94862	0.694484	1.716	2.39967	2.99957	3	2.51851	3.34282	0.911293	thermo	humid
602	D	DB	9	9a	Trop_rain_Australasia	Western Province	Sri Lanka	6.69	80.1583	42	272	39	527	310	235	75	281	269	281	265	2803	44	1071	262	1071	603	0	0	2803	3262	8.59289	3.81139	0.68227	1.64345	2.41996	3.02979	3.03019	2.78104	3.44762	0.934139	infra	humid
603	D	DB	9	9a	Trop_rain_Australasia	Riau	Indonesia	0.7722	101.153	19	264	52	737	303	233	70	262	268	271	258	2707	23	904	427	500	760	0	0	2707	3174	8.52867	1.84502	0.454085	1.36173	2.63144	2.95617	2.69984	2.88138	3.43249	0.930881	infra	humid
604	D	DB	9	9a	Trop_rain_Australasia	Pahang	Malaysia	3.6658	102.738	483	241	58	712	282	200	82	233	240	249	231	2795	27	1023	486	615	837	0	0	2795	2892	9.66459	2.46988	0.540314	1.43136	2.68753	3.00988	2.78958	2.92324	3.44638	0.985184	thermo	humid
605	D	DB	9	9a	Trop_rain_Australasia	West Kalimantan	Indonesia	-0.9569	111.101	313	248	54	762	285	215	70	246	250	252	244	3723	20	1184	655	922	1061	0	0	3723	2978	12.5017	3.65873	0.668268	1.30103	2.8169	3.07335	2.9652	3.02612	3.57089	1.09697	infra	hyperhumid
606	D	DB	9	9a	Trop_rain_Australasia	East Kalimantan	Indonesia	2.2884	116.82	114	260	54	814	295	228	67	261	261	263	256	2673	14	824	531	705	627	0	0	2673	3120	8.56731	2.68061	0.56592	1.14613	2.72591	2.91593	2.8488	2.79796	3.427	0.932844	infra	humid
607	D	DB	9	9a	Trop_rain_Australasia	Davao Region	Philippines	7.5255	125.948	69	271	42	715	301	242	59	275	267	277	263	1915	12	543	409	542	509	0	0	1915	3256	5.88145	1.95668	0.470804	1.07918	2.61278	2.7348	2.7348	2.70757	3.28217	0.769484	infra	subhumid
608	D	DB	9	9a	Trop_rain_Australasia	Maluku	Indonesia	-3.2353	128.529	287	251	25	552	273	227	46	242	255	257	241	2923	40	1199	413	436	1022	0	0	2923	3013	9.70129	1.6965	0.4308	1.60206	2.617	3.07882	2.64048	3.00988	3.46583	0.98683	infra	humid
609	D	DB	9	9a	Trop_rain_Australasia	Papua	Indonesia	-2.8746	138.035	73	263	47	795	293	234	60	264	261	266	260	3284	8	929	768	787	783	0	0	3284	3162	10.3858	2.95865	0.597547	0.90309	2.88593	2.96802	2.89653	2.89432	3.5164	1.01644	infra	humid
610	D	DB	9	9a	Trop_rain_Australasia	Madang Province	Papua New Guinea	-4.7202	145.185	995	208	35	834	229	187	42	209	208	209	206	3711	39	1357	442	1357	543	0	0	3711	2496	14.8678	6.49282	0.874645	1.59106	2.6464	3.13258	3.1329	2.7356	3.56949	1.17225	thermo	hyperhumid
611	D	DA	9	9a	Trop_rainf Caribbean	Cuba	Cuba	22.654	-83.2891	90	249	44	428	296	193	103	267	221	273	221	1411	53	607	130	476	130	0	0	1411	2991	4.71749	1.74359	0.438319	1.72428	2.11727	2.78319	2.67852	2.11727	3.14953	0.673711	infra	subhumid
612	D	DA	9	9a	Trop_rainf Caribbean	Jamaica	Jamaica	18.1576	-77.3178	389	247	28	472	276	217	59	253	233	260	233	1253	47	597	152	278	152	0	0	1253	2966	4.22454	1.06923	0.315809	1.6721	2.18469	2.77597	2.4456	2.18469	3.09795	0.62578	infra	subhumid
613	D	DA	9	9a	Trop_rainf Caribbean	La Espanola	La Espanola	19.5758	-71.3176	245	250	62	566	304	194	110	251	230	268	230	1492	43	600	174	345	174	0	0	1492	2999	4.97499	1.28731	0.359326	1.63347	2.24304	2.77815	2.53908	2.24304	3.17377	0.696792	infra	subhumid
614	D	DA	9	9a	Trop_rainf Caribbean	PuertoRico	PuertoRico	18.2867	-66.3197	475	240	11	265	260	219	41	244	225	253	225	1786	26	570	278	569	278	0	0	1786	2881	6.19924	2.24901	0.511751	1.41497	2.4456	2.75587	2.75587	2.4456	3.25188	0.792338	thermo	humid
615	D	DB	9	9a	Trop_rainf Caribbean	Cuba	Cuba	20.2677	-74.8593	526	234	26	402	265	201	64	244	218	251	216	1122	48	545	142	260	144	0	0	1122	2806	3.99857	1.03586	0.308747	1.68124	2.15534	2.7364	2.41664	2.16137	3.04999	0.601905	infra	subhumid
616	D	DB	9	9a	Trop_rainf Caribbean	La Florida	La Florida	26.52	-81.0309	12	231	77	430	306	127	179	270	198	271	181	1315	56	589	126	556	144	0	0	1315	2773	4.74216	2.05166	0.484536	1.74819	2.1038	2.77012	2.74586	2.16137	3.11893	0.675976	infra	subhumid
